# Supplementary material for: The NUPHAC-EU Framework for Nurses’ Role in Interprofessional Pharmaceutical Care: Cross-Sectional Evaluation in Europe
Source: MDPI journal article supplement (doi:10.3390/ijerph18157862), 2021-07-25
Supplement: s1 [file s1]

# Nurses' roles in interprofessional pharmaceutical care - survey

SURVEY WITH **CODES** AND **VALUES** USED IN SPSS DATABASE

## Response

**Progress** (completeness rate of the survey)

**Q1/** In which country are you currently working?

- Belgium **1**
- Czech Republic **2**
- Germany **3**
- Greece **4**
- Hungary **5**
- Italy **6**
- The Netherlands **7**
- Norway **8**
- Portugal **9**
- Republic of North Macedonia **10**
- Slovakia **11**
- Slovenia **12**
- Spain **13**
- UK (England) **14**
- UK (Wales) **15**
- Other **16: Q1\_16\_TEX**  
**T**

**Qextra/** question only for Belgium (province)

**Q32/** question only for Czech Republic: Uvedte kraj, ve kterém pracujete: Hlavní město Praha (**1**), Středočeský kraj (**4**), Pardubický kraj (**5**), Královéhradecký kraj (**6**), Liberecký kraj (**7**), Ústecký kraj (**8**), Karlovarský kraj (**9**), Plzeňský kraj (**10**), Jihočeský kraj (**11**), Kraj Vysočina (**12**), Jihomoravský kraj (**13**), Zlínský kraj (**14**), Olomoucký kraj (**15**), Moravskoslezský kraj (**16**), Preferuji neuvádět (**17**)

**Q33/** question only for Czech Republic: Uvedte typ poskytovatele péče: Fakultní nemocnice (**1**), Soukromé zařízení (**4**), Státní (krajské, oblastní) zařízení (**5**), Preferuji neuvádět (**6**), Řízený krajem (**8**)

**Q2/** What is your gender?

- Male **1**
- Female **2**
- Other **3**
- Prefer not to say **4**

**Q3/** What is your age? .... Years **Q3\_1**

**Q4/** How many years of work experience do you have in healthcare? .... Years **Q4\_1**

**Q5/** What is your profession? **Q5**

- Physician **1**
- Pharmacist **2**
- Nurse **3**
- Other (by clicking this option the survey will end for you) **4**

**Q35/** question only for Germany: Welches höchste pflegerische Kompetenzniveau haben Sie? Niveau 2 oder 3 (**1**), niveau 4 (**4**), niveau 5 (**5**), niveau 6 (**6**), niveau 7 (**9**), niveau 8 (**10**)

**Q6/** Question only for nurses: What is your highest level of nursing education?

- Level 4 (option not shown in all countries) **1**
- Level 5 (not in the Netherlands) **2**
- Level 6 **3**
- Level **74**
- Level 8 **5**
- Other **6: .... Q\_6\_TEXT**

**Q34/** only for UK: Have you successfully completed an M-level prescribing module to qualify you to prescribe? **Yes=2, no=1**

**Q7/** In which healthcare setting do you have experience? (please tick all that apply)

- **Q7\_1** Community or primary care **yes=1, no=0**
- **Q7\_2** Residential care **yes=1, no=0**
- **Q7\_3** Hospital care **yes=1, no=0**
- **Q7\_5** Mental healthcare **yes=1, no=0**
- **Q7\_4** No experience in clinical practice **yes=1, no=0**
- Only UK: **Q7\_6** Other **=1, no=0: ... Q7\_6\_TEXT**

**Q8/** Which of these best describes your employment at the moment? (please tick all that apply)

- **Q7\_1**Clinical practice **yes=1,no=0**
- **Q8\_2**Research **yes=1,no=0**
- **Q8\_3**Education **yes=1,no=0**
- **Q8\_4**Policy making **yes=1,no=0**

Q9/Can you make a distinction between nurse responsibilities based on their educational level?

- **1**Yes, I can (-> only questions Q10b Q11b Q12 Q13b Q14b Q17b Q18b Q19b will be shown)
- **2**No, I can't (-> only questions Q10a Q11a Q12a Q13a Q14a Q17a Q18a Q19b will be shown)

#### Q10a/ RESPONSIBILITY 1: Management of therapeutic and adverse effects of medicines.

|                                                     | <b>Task NOT RELEVANT</b> within 'management of therapeutic and adverse effects of medicines'. (skip following columns, when this options is ticked) | <b>Task PROHIBITED</b> for nurses within 'management of therapeutic and adverse effects of medicines'. (skip following columns, when this options is ticked) | <b>Task PERMITTED</b> for <b>all levels</b> of nurses within 'management of therapeutic and adverse effects of medicines'. Specify the level of responsibility. (skip following columns, when this options is ticked) | Specify the level of responsibility for <b>level 4</b> nurses performing this task within 'management of therapeutic and adverse effects of medicines'.<br><i>Variable only applicable in Germany and the Netherlands</i> | Specify the level of responsibility for <b>level 5</b> nurses performing this task within 'management of therapeutic and adverse effects of medicines'. | Specify the level of responsibility for <b>level 6</b> nurses performing this task within 'management of therapeutic and adverse effects of medicines'. | Specify the level of responsibility for <b>level 7</b> nurses performing this task within 'management of therapeutic and adverse effects of medicines'. | Specify the level of responsibility for <b>level 8</b> nurses performing this task within 'management of therapeutic and adverse effects of medicines'. |
|-----------------------------------------------------|-----------------------------------------------------------------------------------------------------------------------------------------------------|--------------------------------------------------------------------------------------------------------------------------------------------------------------|-----------------------------------------------------------------------------------------------------------------------------------------------------------------------------------------------------------------------|---------------------------------------------------------------------------------------------------------------------------------------------------------------------------------------------------------------------------|---------------------------------------------------------------------------------------------------------------------------------------------------------|---------------------------------------------------------------------------------------------------------------------------------------------------------|---------------------------------------------------------------------------------------------------------------------------------------------------------|---------------------------------------------------------------------------------------------------------------------------------------------------------|
| observation, documentation, registration, reporting | <b>Q10a_4_1_1</b><br>Ticked = 1<br>Not ticked = 0                                                                                                   | <b>Q10a_2_1_1</b><br>Ticked = 1<br>Not ticked = 0                                                                                                            | <b>Q10a_3_1</b><br>1: under supervision<br>2: shared responsibility<br>3: full autonomy                                                                                                                               | <b>Q36_5_1</b><br>1: not allowed<br>2: under supervision<br>3: shared responsibility<br>4: full autonomy                                                                                                                  | <b>Q10a_5_1</b><br>1: not allowed<br>2: under supervision<br>3: shared responsibility<br>4: full autonomy                                               | <b>Q10a_1_1</b><br>1: not allowed<br>2: under supervision<br>3: shared responsibility<br>4: full autonomy                                               | <b>Q10a_6_1</b><br>1: not allowed<br>2: under supervision<br>3: shared responsibility<br>4: full autonomy                                               | <b>Q10a_7_1</b><br>1: not allowed<br>2: under supervision<br>3: shared responsibility<br>4: full autonomy                                               |
| assessing patients' competences                     | <b>Q10a_4_2_1</b><br>Ticked = 1<br>Not ticked = 0                                                                                                   | <b>Q10a_2_2_1</b><br>Ticked = 1<br>Not ticked = 0                                                                                                            | <b>Q10a_3_2</b><br>1: under supervision<br>2: shared responsibility<br>3: full autonomy                                                                                                                               | <b>Q36_5_2</b><br>1: not allowed<br>2: under supervision<br>3: shared responsibility<br>4: full autonomy                                                                                                                  | <b>Q10a_5_2</b><br>1: not allowed<br>2: under supervision<br>3: shared responsibility<br>4: full autonomy                                               | <b>Q10a_1_2</b><br>1: not allowed<br>2: under supervision<br>3: shared responsibility<br>4: full autonomy                                               | <b>Q10a_6_2</b><br>1: not allowed<br>2: under supervision<br>3: shared responsibility<br>4: full autonomy                                               | <b>Q10a_7_2</b><br>1: not allowed<br>2: under supervision<br>3: shared responsibility<br>4: full autonomy                                               |
| assessment and addressing patient/family needs      | <b>Q10a_4_3_1</b><br>Ticked = 1<br>Not ticked = 0                                                                                                   | <b>Q10a_2_3_1</b><br>Ticked = 1<br>Not ticked = 0                                                                                                            | <b>Q10a_3_3</b><br>1: under supervision<br>2: shared responsibility<br>3: full autonomy                                                                                                                               | <b>Q36_5_3</b><br>1: not allowed<br>2: under supervision<br>3: shared responsibility                                                                                                                                      | <b>Q10a_5_3</b><br>1: not allowed<br>2: under supervision<br>3: shared responsibility                                                                   | <b>Q10a_1_3</b><br>1: not allowed<br>2: under supervision<br>3: shared responsibility                                                                   | <b>Q10a_6_3</b><br>1: not allowed<br>2: under supervision<br>3: shared responsibility                                                                   | <b>Q10a_7_3</b><br>1: not allowed<br>2: under supervision<br>3: shared responsibility                                                                   |

|                                                                                                                        |                                                    |                                                    |                                                                                          |                                                                                                           |                                                                                                            |                                                                                                            |                                                                                                            |                                                                                                            |
|------------------------------------------------------------------------------------------------------------------------|----------------------------------------------------|----------------------------------------------------|------------------------------------------------------------------------------------------|-----------------------------------------------------------------------------------------------------------|------------------------------------------------------------------------------------------------------------|------------------------------------------------------------------------------------------------------------|------------------------------------------------------------------------------------------------------------|------------------------------------------------------------------------------------------------------------|
|                                                                                                                        |                                                    |                                                    |                                                                                          | 4: full autonomy                                                                                          | 4: full autonomy                                                                                           | 4: full autonomy                                                                                           | 4: full autonomy                                                                                           | 4: full autonomy                                                                                           |
| recognising & preventing risks / complications / medication errors                                                     | <b>Q10a_4_4_1</b><br>Ticked = 1<br>Not ticked = 0  | <b>Q10a_2_4_1</b><br>Ticked = 1<br>Not ticked = 0  | <b>Q10a_3_4</b><br>1: under supervision<br>2: shared responsibility<br>3: full autonomy  | <b>Q36_5_4</b><br>1: not allowed<br>2: under supervision<br>3: shared responsibility<br>4: full autonomy  | <b>Q10a_5_4</b><br>1: not allowed<br>2: under supervision<br>3: shared responsibility<br>4: full autonomy  | <b>Q10a_1_4</b><br>1: not allowed<br>2: under supervision<br>3: shared responsibility<br>4: full autonomy  | <b>Q10a_6_4</b><br>1: not allowed<br>2: under supervision<br>3: shared responsibility<br>4: full autonomy  | <b>Q10a_7_4</b><br>1: not allowed<br>2: under supervision<br>3: shared responsibility<br>4: full autonomy  |
| identification, reporting and addressing contra-indications to administration, identification of drug related problems | <b>Q10a_4_5_1</b><br>Ticked = 1<br>Not ticked = 0  | <b>Q10a_2_5_1</b><br>Ticked = 1<br>Not ticked = 0  | <b>Q10a_3_5</b><br>1: under supervision<br>2: shared responsibility<br>3: full autonomy  | <b>Q36_5_5</b><br>1: not allowed<br>2: under supervision<br>3: shared responsibility<br>4: full autonomy  | <b>Q10a_5_5</b><br>1: not allowed<br>2: under supervision<br>3: shared responsibility<br>4: full autonomy  | <b>Q10a_1_5</b><br>1: not allowed<br>2: under supervision<br>3: shared responsibility<br>4: full autonomy  | <b>Q10a_6_5</b><br>1: not allowed<br>2: under supervision<br>3: shared responsibility<br>4: full autonomy  | <b>Q10a_7_5</b><br>1: not allowed<br>2: under supervision<br>3: shared responsibility<br>4: full autonomy  |
| follow-up                                                                                                              | <b>Q10a_4_6_1</b><br>Ticked = 1<br>Not ticked = 0  | <b>Q10a_2_6_1</b><br>Ticked = 1<br>Not ticked = 0  | <b>Q10a_3_6</b><br>1: under supervision<br>2: shared responsibility<br>3: full autonomy  | <b>Q36_5_6</b><br>1: not allowed<br>2: under supervision<br>3: shared responsibility<br>4: full autonomy  | <b>Q10a_5_6</b><br>1: not allowed<br>2: under supervision<br>3: shared responsibility<br>4: full autonomy  | <b>Q10a_1_6</b><br>1: not allowed<br>2: under supervision<br>3: shared responsibility<br>4: full autonomy  | <b>Q10a_6_6</b><br>1: not allowed<br>2: under supervision<br>3: shared responsibility<br>4: full autonomy  | <b>Q10a_7_6</b><br>1: not allowed<br>2: under supervision<br>3: shared responsibility<br>4: full autonomy  |
| Adhering to evidence based practice as described in clinical guidelines                                                | <b>Q10a_4_7_1</b><br>Ticked = 1<br>Not ticked = 0  | <b>Q10a_2_7_1</b><br>Ticked = 1<br>Not ticked = 0  | <b>Q10a_3_7</b><br>1: under supervision<br>2: shared responsibility<br>3: full autonomy  | <b>Q36_5_7</b><br>1: not allowed<br>2: under supervision<br>3: shared responsibility<br>4: full autonomy  | <b>Q10a_5_7</b><br>1: not allowed<br>2: under supervision<br>3: shared responsibility<br>4: full autonomy  | <b>Q10a_1_7</b><br>1: not allowed<br>2: under supervision<br>3: shared responsibility<br>4: full autonomy  | <b>Q10a_6_7</b><br>1: not allowed<br>2: under supervision<br>3: shared responsibility<br>4: full autonomy  | <b>Q10a_7_7</b><br>1: not allowed<br>2: under supervision<br>3: shared responsibility<br>4: full autonomy  |
| decision making                                                                                                        | <b>Q10a_4_8_1</b><br>Ticked = 1<br>Not ticked = 0  | <b>Q10a_2_8_1</b><br>Ticked = 1<br>Not ticked = 0  | <b>Q10a_3_8</b><br>1: under supervision<br>2: shared responsibility<br>3: full autonomy  | <b>Q36_5_8</b><br>1: not allowed<br>2: under supervision<br>3: shared responsibility<br>4: full autonomy  | <b>Q10a_5_8</b><br>1: not allowed<br>2: under supervision<br>3: shared responsibility<br>4: full autonomy  | <b>Q10a_1_8</b><br>1: not allowed<br>2: under supervision<br>3: shared responsibility<br>4: full autonomy  | <b>Q10a_6_8</b><br>1: not allowed<br>2: under supervision<br>3: shared responsibility<br>4: full autonomy  | <b>Q10a_7_8</b><br>1: not allowed<br>2: under supervision<br>3: shared responsibility<br>4: full autonomy  |
| communication /discussion with patient/family                                                                          | <b>Q10a_4_9_1</b><br>Ticked = 1<br>Not ticked = 0  | <b>Q10a_2_9_1</b><br>Ticked = 1<br>Not ticked = 0  | <b>Q10a_3_9</b><br>1: under supervision<br>2: shared responsibility<br>3: full autonomy  | <b>Q36_5_9</b><br>1: not allowed<br>2: under supervision<br>3: shared responsibility<br>4: full autonomy  | <b>Q10a_5_9</b><br>1: not allowed<br>2: under supervision<br>3: shared responsibility<br>4: full autonomy  | <b>Q10a_1_9</b><br>1: not allowed<br>2: under supervision<br>3: shared responsibility<br>4: full autonomy  | <b>Q10a_6_9</b><br>1: not allowed<br>2: under supervision<br>3: shared responsibility<br>4: full autonomy  | <b>Q10a_7_9</b><br>1: not allowed<br>2: under supervision<br>3: shared responsibility<br>4: full autonomy  |
| Inter / intraprofessional referrals                                                                                    | <b>Q10a_4_10_1</b><br>Ticked = 1<br>Not ticked = 0 | <b>Q10a_2_10_1</b><br>Ticked = 1<br>Not ticked = 0 | <b>Q10a_3_10</b><br>1: under supervision<br>2: shared responsibility<br>3: full autonomy | <b>Q36_5_10</b><br>1: not allowed<br>2: under supervision<br>3: shared responsibility<br>4: full autonomy | <b>Q10a_5_10</b><br>1: not allowed<br>2: under supervision<br>3: shared responsibility<br>4: full autonomy | <b>Q10a_1_10</b><br>1: not allowed<br>2: under supervision<br>3: shared responsibility<br>4: full autonomy | <b>Q10a_6_10</b><br>1: not allowed<br>2: under supervision<br>3: shared responsibility<br>4: full autonomy | <b>Q10a_7_10</b><br>1: not allowed<br>2: under supervision<br>3: shared responsibility<br>4: full autonomy |
| facilitation of medication management                                                                                  | <b>Q10a_4_12_1</b><br>Ticked = 1<br>Not ticked = 0 | <b>Q10a_2_12_1</b><br>Ticked = 1<br>Not ticked = 0 | <b>Q10a_3_12</b><br>1: under supervision<br>2: shared responsibility<br>3: full autonomy | <b>Q36_5_12</b><br>1: not allowed<br>2: under supervision<br>3: shared responsibility<br>4: full autonomy | <b>Q10a_5_12</b><br>1: not allowed<br>2: under supervision<br>3: shared responsibility<br>4: full autonomy | <b>Q10a_1_12</b><br>1: not allowed<br>2: under supervision<br>3: shared responsibility<br>4: full autonomy | <b>Q10a_6_12</b><br>1: not allowed<br>2: under supervision<br>3: shared responsibility<br>4: full autonomy | <b>Q10a_7_12</b><br>1: not allowed<br>2: under supervision<br>3: shared responsibility<br>4: full autonomy |
| self-care support and education of patients                                                                            | <b>Q10a_4_15_1</b><br>Ticked = 1<br>Not ticked = 0 | <b>Q10a_2_15_1</b><br>Ticked = 1<br>Not ticked = 0 | <b>Q10a_3_15</b><br>1: under supervision<br>2: shared responsibility<br>3: full autonomy | <b>Q36_5_15</b><br>1: not allowed<br>2: under supervision<br>3: shared responsibility<br>4: full autonomy | <b>Q10a_5_15</b><br>1: not allowed<br>2: under supervision<br>3: shared responsibility<br>4: full autonomy | <b>Q10a_1_15</b><br>1: not allowed<br>2: under supervision<br>3: shared responsibility<br>4: full autonomy | <b>Q10a_6_15</b><br>1: not allowed<br>2: under supervision<br>3: shared responsibility<br>4: full autonomy | <b>Q10a_7_15</b><br>1: not allowed<br>2: under supervision<br>3: shared responsibility<br>4: full autonomy |

|                                                                                                                                                            |                                                                                        |                                                                                        |                                                                                                                              |                                                                                                                                              |                                                                                                                                                |                                                                                                                                                |                                                                                                                                                |                                                                                                                                                |
|------------------------------------------------------------------------------------------------------------------------------------------------------------|----------------------------------------------------------------------------------------|----------------------------------------------------------------------------------------|------------------------------------------------------------------------------------------------------------------------------|----------------------------------------------------------------------------------------------------------------------------------------------|------------------------------------------------------------------------------------------------------------------------------------------------|------------------------------------------------------------------------------------------------------------------------------------------------|------------------------------------------------------------------------------------------------------------------------------------------------|------------------------------------------------------------------------------------------------------------------------------------------------|
| advice (to patient or other healthcare professional)                                                                                                       | <b>Q10a_4_16_1</b><br>Ticked = 1<br>Not ticked = 0                                     | <b>Q10a_2_16_1</b><br>Ticked = 1<br>Not ticked = 0                                     | <b>Q10a_3_16</b><br>1: under supervision<br>2: shared responsibility<br>3: full autonomy                                     | <b>Q36_5_16</b><br>1: not allowed<br>2: under supervision<br>3: shared responsibility<br>4: full autonomy                                    | <b>Q10a_5_16</b><br>1: not allowed<br>2: under supervision<br>3: shared responsibility<br>4: full autonomy                                     | <b>Q10a_1_16</b><br>1: not allowed<br>2: under supervision<br>3: shared responsibility<br>4: full autonomy                                     | <b>Q10a_6_16</b><br>1: not allowed<br>2: under supervision<br>3: shared responsibility<br>4: full autonomy                                     | <b>Q10a_7_16</b><br>1: not allowed<br>2: under supervision<br>3: shared responsibility<br>4: full autonomy                                     |
| transitional care communication, inter / intraprofessional collaboration / communication including reporting, advising, informing, alerting and discussing | <b>Q10a_4_17_1</b><br>Ticked = 1<br>Not ticked = 0                                     | <b>Q10a_2_17_1</b><br>Ticked = 1<br>Not ticked = 0                                     | <b>Q10a_3_17</b><br>1: under supervision<br>2: shared responsibility<br>3: full autonomy                                     | <b>Q36_5_17</b><br>1: not allowed<br>2: under supervision<br>3: shared responsibility<br>4: full autonomy                                    | <b>Q10a_5_17</b><br>1: not allowed<br>2: under supervision<br>3: shared responsibility<br>4: full autonomy                                     | <b>Q10a_1_17</b><br>1: not allowed<br>2: under supervision<br>3: shared responsibility<br>4: full autonomy                                     | <b>Q10a_6_17</b><br>1: not allowed<br>2: under supervision<br>3: shared responsibility<br>4: full autonomy                                     | <b>Q10a_7_17</b><br>1: not allowed<br>2: under supervision<br>3: shared responsibility<br>4: full autonomy                                     |
| mentoring colleagues                                                                                                                                       | <b>Q10a_4_18_1</b><br>Ticked = 1<br>Not ticked = 0                                     | <b>Q10a_2_18_1</b><br>Ticked = 1<br>Not ticked = 0                                     | <b>Q10a_3_18</b><br>1: under supervision<br>2: shared responsibility<br>3: full autonomy                                     | <b>Q36_5_18</b><br>1: not allowed<br>2: under supervision<br>3: shared responsibility<br>4: full autonomy                                    | <b>Q10a_5_18</b><br>1: not allowed<br>2: under supervision<br>3: shared responsibility<br>4: full autonomy                                     | <b>Q10a_1_18</b><br>1: not allowed<br>2: under supervision<br>3: shared responsibility<br>4: full autonomy                                     | <b>Q10a_6_18</b><br>1: not allowed<br>2: under supervision<br>3: shared responsibility<br>4: full autonomy                                     | <b>Q10a_7_18</b><br>1: not allowed<br>2: under supervision<br>3: shared responsibility<br>4: full autonomy                                     |
| other task within management of therapeutic and adverse effects of medicines: PLEASE SPECIFY                                                               | <b>Q10a_4_19_1</b><br>Ticked = 1<br>Not ticked = 0<br><b>Q10a_4_19_T</b><br><b>EXT</b> | <b>Q10a_2_19_1</b><br>Ticked = 1<br>Not ticked = 0<br><b>Q10a_2_19_T</b><br><b>EXT</b> | <b>Q10a_3_19</b><br>1: under supervision<br>2: shared responsibility<br>3: full autonomy<br><b>Q10a_3_19_</b><br><b>TEXT</b> | <b>Q36_5_19</b><br>1: not allowed<br>2: under supervision<br>3: shared responsibility<br>4: full autonomy<br><b>Q36_5_19_T</b><br><b>EXT</b> | <b>Q10a_5_19</b><br>1: not allowed<br>2: under supervision<br>3: shared responsibility<br>4: full autonomy<br><b>Q10a_5_19_</b><br><b>TEXT</b> | <b>Q10a_1_19</b><br>1: not allowed<br>2: under supervision<br>3: shared responsibility<br>4: full autonomy<br><b>Q10a_1_19_</b><br><b>TEXT</b> | <b>Q10a_6_19</b><br>1: not allowed<br>2: under supervision<br>3: shared responsibility<br>4: full autonomy<br><b>Q10a_6_19_</b><br><b>TEXT</b> | <b>Q10a_7_19</b><br>1: not allowed<br>2: under supervision<br>3: shared responsibility<br>4: full autonomy<br><b>Q10a_7_19_</b><br><b>TEXT</b> |

#### Q11a/ RESPONSIBILITY 2: management of medicines adherence.

|                                                  | <b>Task <u>not</u> relevant</b><br>within management of medicines adherence.<br>(skip following columns, when this options is ticked) | <b>Task <u>not</u> allowed</b><br>for nurses within management of medicines adherence.<br>(skip following columns, when this options is ticked) | Task allowed for <b>all levels</b> of nurses within management of medicines adherence.<br>Specify the level of responsibility.<br>(skip following columns, when this options is ticked) | Specify the level of responsibility for <b>level 4</b> nurses performing this task within management of medicines adherence<br><b>Variable only applicable in Germany and the Netherlands</b> | Specify the level of responsibility for <b>level 5</b> nurses performing this task within management of medicines adherence | Specify the level of responsibility for <b>level 6</b> nurses performing this task within management of medicines adherence | Specify the level of responsibility for <b>level 7</b> nurses performing this task within management of medicines adherence | Specify the level of responsibility for <b>level 8</b> nurses performing this task within management of medicines adherence |
|--------------------------------------------------|---------------------------------------------------------------------------------------------------------------------------------------|-------------------------------------------------------------------------------------------------------------------------------------------------|-----------------------------------------------------------------------------------------------------------------------------------------------------------------------------------------|-----------------------------------------------------------------------------------------------------------------------------------------------------------------------------------------------|-----------------------------------------------------------------------------------------------------------------------------|-----------------------------------------------------------------------------------------------------------------------------|-----------------------------------------------------------------------------------------------------------------------------|-----------------------------------------------------------------------------------------------------------------------------|
| observation, documentation, registration, report | <b>Q11a_4_1_1</b><br>Ticked = 1<br>Not ticked = 0                                                                                     | <b>Q11a_2_1_1</b><br>Ticked = 1<br>Not ticked = 0                                                                                               | <b>Q11a_3_1</b><br>1: under supervision<br>2: shared responsibility<br>3: full autonomy                                                                                                 | <b>Q42_5_1</b><br>1: not allowed<br>2: under supervision<br>3: shared responsibility                                                                                                          | <b>Q11a_5_1</b><br>1: not allowed<br>2: under supervision<br>3: shared responsibility                                       | <b>Q11a_1_1</b><br>1: not allowed<br>2: under supervision<br>3: shared responsibility                                       | <b>Q11a_6_1</b><br>1: not allowed<br>2: under supervision<br>3: shared responsibility                                       | <b>Q11a_7_1</b><br>1: not allowed<br>2: under supervision<br>3: shared responsibility                                       |



|                                                                                                                                                                                    |                                                                                        |                                                                                        |                                                                                                                              |                                                                                                                                              |                                                                                                                                                |                                                                                                                                                |                                                                                                                                                |                                                                                                                                                |
|------------------------------------------------------------------------------------------------------------------------------------------------------------------------------------|----------------------------------------------------------------------------------------|----------------------------------------------------------------------------------------|------------------------------------------------------------------------------------------------------------------------------|----------------------------------------------------------------------------------------------------------------------------------------------|------------------------------------------------------------------------------------------------------------------------------------------------|------------------------------------------------------------------------------------------------------------------------------------------------|------------------------------------------------------------------------------------------------------------------------------------------------|------------------------------------------------------------------------------------------------------------------------------------------------|
|                                                                                                                                                                                    |                                                                                        |                                                                                        |                                                                                                                              | 4: full autonomy                                                                                                                             | 4: full autonomy                                                                                                                               | 4: full autonomy                                                                                                                               | 4: full autonomy                                                                                                                               | 4: full autonomy                                                                                                                               |
| Inter /<br>intraprofessional<br>referrals                                                                                                                                          | <b>Q11a_4_12_1</b><br>Ticked = 1<br>Not ticked = 0                                     | <b>Q11a_2_12_1</b><br>Ticked = 1<br>Not ticked = 0                                     | <b>Q11a_3_12</b><br>1: under supervision<br>2: shared responsibility<br>3: full autonomy                                     | <b>Q42_5_12</b><br>1: not allowed<br>2: under supervision<br>3: shared responsibility<br>4: full autonomy                                    | <b>Q11a_5_12</b><br>1: not allowed<br>2: under supervision<br>3: shared responsibility<br>4: full autonomy                                     | <b>Q11a_1_12</b><br>1: not allowed<br>2: under supervision<br>3: shared responsibility<br>4: full autonomy                                     | <b>Q11a_6_12</b><br>1: not allowed<br>2: under supervision<br>3: shared responsibility<br>4: full autonomy                                     | <b>Q11a_7_12</b><br>1: not allowed<br>2: under supervision<br>3: shared responsibility<br>4: full autonomy                                     |
| facilitation of<br>medication<br>management                                                                                                                                        | <b>Q11a_4_14_1</b><br>Ticked = 1<br>Not ticked = 0                                     | <b>Q11a_2_14_1</b><br>Ticked = 1<br>Not ticked = 0                                     | <b>Q11a_3_14</b><br>1: under supervision<br>2: shared responsibility<br>3: full autonomy                                     | <b>Q42_5_14</b><br>1: not allowed<br>2: under supervision<br>3: shared responsibility<br>4: full autonomy                                    | <b>Q11a_5_14</b><br>1: not allowed<br>2: under supervision<br>3: shared responsibility<br>4: full autonomy                                     | <b>Q11a_1_14</b><br>1: not allowed<br>2: under supervision<br>3: shared responsibility<br>4: full autonomy                                     | <b>Q11a_6_14</b><br>1: not allowed<br>2: under supervision<br>3: shared responsibility<br>4: full autonomy                                     | <b>Q11a_7_14</b><br>1: not allowed<br>2: under supervision<br>3: shared responsibility<br>4: full autonomy                                     |
| selfcare support and<br>therapeutic<br>education                                                                                                                                   | <b>Q11a_4_17_1</b><br>Ticked = 1<br>Not ticked = 0                                     | <b>Q11a_2_17_1</b><br>Ticked = 1<br>Not ticked = 0                                     | <b>Q11a_3_17</b><br>1: under supervision<br>2: shared responsibility<br>3: full autonomy                                     | <b>Q42_5_17</b><br>1: not allowed<br>2: under supervision<br>3: shared responsibility<br>4: full autonomy                                    | <b>Q11a_5_17</b><br>1: not allowed<br>2: under supervision<br>3: shared responsibility<br>4: full autonomy                                     | <b>Q11a_1_17</b><br>1: not allowed<br>2: under supervision<br>3: shared responsibility<br>4: full autonomy                                     | <b>Q11a_6_17</b><br>1: not allowed<br>2: under supervision<br>3: shared responsibility<br>4: full autonomy                                     | <b>Q11a_7_17</b><br>1: not allowed<br>2: under supervision<br>3: shared responsibility<br>4: full autonomy                                     |
| advice (patient or<br>other healthcare<br>professional)                                                                                                                            | <b>Q11a_4_18_1</b><br>Ticked = 1<br>Not ticked = 0                                     | <b>Q11a_2_18_1</b><br>Ticked = 1<br>Not ticked = 0                                     | <b>Q11a_3_18</b><br>1: under supervision<br>2: shared responsibility<br>3: full autonomy                                     | <b>Q42_5_18</b><br>1: not allowed<br>2: under supervision<br>3: shared responsibility<br>4: full autonomy                                    | <b>Q11a_5_18</b><br>1: not allowed<br>2: under supervision<br>3: shared responsibility<br>4: full autonomy                                     | <b>Q11a_1_18</b><br>1: not allowed<br>2: under supervision<br>3: shared responsibility<br>4: full autonomy                                     | <b>Q11a_6_18</b><br>1: not allowed<br>2: under supervision<br>3: shared responsibility<br>4: full autonomy                                     | <b>Q11a_7_18</b><br>1: not allowed<br>2: under supervision<br>3: shared responsibility<br>4: full autonomy                                     |
| transitional care<br>communication, inter<br>/ intraprofessional<br>collaboration /<br>communication<br>including reporting,<br>advising, informing,<br>alerting and<br>discussing | <b>Q11a_4_19_1</b><br>Ticked = 1<br>Not ticked = 0                                     | <b>Q11a_2_19_1</b><br>Ticked = 1<br>Not ticked = 0                                     | <b>Q11a_3_19</b><br>1: under supervision<br>2: shared responsibility<br>3: full autonomy                                     | <b>Q42_5_19</b><br>1: not allowed<br>2: under supervision<br>3: shared responsibility<br>4: full autonomy                                    | <b>Q11a_5_19</b><br>1: not allowed<br>2: under supervision<br>3: shared responsibility<br>4: full autonomy                                     | <b>Q11a_1_19</b><br>1: not allowed<br>2: under supervision<br>3: shared responsibility<br>4: full autonomy                                     | <b>Q11a_6_19</b><br>1: not allowed<br>2: under supervision<br>3: shared responsibility<br>4: full autonomy                                     | <b>Q11a_7_19</b><br>1: not allowed<br>2: under supervision<br>3: shared responsibility<br>4: full autonomy                                     |
| collegial mentoring                                                                                                                                                                | <b>Q11a_4_20_1</b><br>Ticked = 1<br>Not ticked = 0                                     | <b>Q11a_2_20_1</b><br>Ticked = 1<br>Not ticked = 0                                     | <b>Q11a_3_20</b><br>1: under supervision<br>2: shared responsibility<br>3: full autonomy                                     | <b>Q42_5_20</b><br>1: not allowed<br>2: under supervision<br>3: shared responsibility<br>4: full autonomy                                    | <b>Q11a_5_20</b><br>1: not allowed<br>2: under supervision<br>3: shared responsibility<br>4: full autonomy                                     | <b>Q11a_1_20</b><br>1: not allowed<br>2: under supervision<br>3: shared responsibility<br>4: full autonomy                                     | <b>Q11a_6_20</b><br>1: not allowed<br>2: under supervision<br>3: shared responsibility<br>4: full autonomy                                     | <b>Q11a_7_20</b><br>1: not allowed<br>2: under supervision<br>3: shared responsibility<br>4: full autonomy                                     |
| other task within<br>management of<br>medicines adherence:                                                                                                                         | <b>Q11a_4_21_1</b><br>Ticked = 1<br>Not ticked = 0<br><b>Q11a_4_21_T</b><br><b>EXT</b> | <b>Q11a_2_21_1</b><br>Ticked = 1<br>Not ticked = 0<br><b>Q11a_2_21_T</b><br><b>EXT</b> | <b>Q11a_3_21</b><br>1: under supervision<br>2: shared responsibility<br>3: full autonomy<br><b>Q11a_3_21_T</b><br><b>EXT</b> | <b>Q42_5_21</b><br>1: not allowed<br>2: under supervision<br>3: shared responsibility<br>4: full autonomy<br><b>Q42_5_21_T</b><br><b>EXT</b> | <b>Q11a_5_21</b><br>1: not allowed<br>2: under supervision<br>3: shared responsibility<br>4: full autonomy<br><b>Q11a_5_21_</b><br><b>TEXT</b> | <b>Q11a_1_21</b><br>1: not allowed<br>2: under supervision<br>3: shared responsibility<br>4: full autonomy<br><b>Q11a_1_21_</b><br><b>TEXT</b> | <b>Q11a_6_21</b><br>1: not allowed<br>2: under supervision<br>3: shared responsibility<br>4: full autonomy<br><b>Q11a_6_21_</b><br><b>TEXT</b> | <b>Q11a_7_21</b><br>1: not allowed<br>2: under supervision<br>3: shared responsibility<br>4: full autonomy<br><b>Q11a_7_21_</b><br><b>TEXT</b> |

**Q12a/ RESPONSIBILITY 3: management of patient medication self-management.**

|                                                                                              | <b>Task <u>not</u> relevant</b><br>within<br>management of<br>patient<br>medication self-<br>management. | <b>Task <u>not</u> allowed</b><br>for nurses within<br>management of<br>patient<br>medication self-<br>management.<br>(skip following<br>columns, when<br>this options is<br>ticked) | Task allowed for<br><b>all levels</b> of<br>nurses within<br>management of<br>patient<br>medication self-<br>management.<br>Specify the level<br>of<br>responsibility.<br>(skip following<br>columns, when<br>this options is<br>ticked) | Specify the level<br>of responsibility<br>for <b>level 4</b><br>nurses<br>performing this<br>task within<br>patient<br>medication self-<br>management<br><b>Variable only</b><br>applicable in<br>Germany and<br>the Netherlands | Specify the level<br>of responsibility<br>for <b>level 5</b><br>nurses<br>performing this<br>task within<br>patient<br>medication self-<br>management | Specify the level<br>of responsibility<br>for <b>level 6</b><br>nurses<br>performing this<br>task within<br>patient<br>medication self-<br>management | Specify the level<br>of responsibility<br>for <b>level 7</b><br>nurses<br>performing this<br>task within<br>patient<br>medication self-<br>management | Specify the level<br>of responsibility<br>for <b>level 8</b><br>nurses<br>performing this<br>task within<br>patient<br>medication self-<br>management |
|----------------------------------------------------------------------------------------------|----------------------------------------------------------------------------------------------------------|--------------------------------------------------------------------------------------------------------------------------------------------------------------------------------------|------------------------------------------------------------------------------------------------------------------------------------------------------------------------------------------------------------------------------------------|----------------------------------------------------------------------------------------------------------------------------------------------------------------------------------------------------------------------------------|-------------------------------------------------------------------------------------------------------------------------------------------------------|-------------------------------------------------------------------------------------------------------------------------------------------------------|-------------------------------------------------------------------------------------------------------------------------------------------------------|-------------------------------------------------------------------------------------------------------------------------------------------------------|
| observation,<br>documentation,<br>registration, report                                       | <b>Q12a_4_1_1</b><br>Ticked = 1<br>Not ticked = 0                                                        | <b>Q12a_2_1_1</b><br>Ticked = 1<br>Not ticked = 0                                                                                                                                    | <b>Q12a_3_1</b><br>1: under supervision<br>2: shared responsibility<br>3: full autonomy                                                                                                                                                  | <b>Q41_5_1</b><br>1: not allowed<br>2: under supervision<br>3: shared responsibility<br>4: full autonomy                                                                                                                         | <b>Q12a_5_1</b><br>1: not allowed<br>2: under supervision<br>3: shared responsibility<br>4: full autonomy                                             | <b>Q12a_1_1</b><br>1: not allowed<br>2: under supervision<br>3: shared responsibility<br>4: full autonomy                                             | <b>Q12a_6_1</b><br>1: not allowed<br>2: under supervision<br>3: shared responsibility<br>4: full autonomy                                             | <b>Q12a_7_1</b><br>1: not allowed<br>2: under supervision<br>3: shared responsibility<br>4: full autonomy                                             |
| assessing patients<br>competences                                                            | <b>Q12a_4_2_1</b><br>Ticked = 1<br>Not ticked = 0                                                        | <b>Q12a_2_2_1</b><br>Ticked = 1<br>Not ticked = 0                                                                                                                                    | <b>Q12a_3_2</b><br>1: under supervision<br>2: shared responsibility<br>3: full autonomy                                                                                                                                                  | <b>Q41_5_2</b><br>1: not allowed<br>2: under supervision<br>3: shared responsibility<br>4: full autonomy                                                                                                                         | <b>Q12a_5_2</b><br>1: not allowed<br>2: under supervision<br>3: shared responsibility<br>4: full autonomy                                             | <b>Q12a_1_2</b><br>1: not allowed<br>2: under supervision<br>3: shared responsibility<br>4: full autonomy                                             | <b>Q12a_6_2</b><br>1: not allowed<br>2: under supervision<br>3: shared responsibility<br>4: full autonomy                                             | <b>Q12a_7_2</b><br>1: not allowed<br>2: under supervision<br>3: shared responsibility<br>4: full autonomy                                             |
| assessment and<br>addressing<br>patient/family needs                                         | <b>Q12a_4_3_1</b><br>Ticked = 1<br>Not ticked = 0                                                        | <b>Q12a_2_3_1</b><br>Ticked = 1<br>Not ticked = 0                                                                                                                                    | <b>Q12a_3_3</b><br>1: under supervision<br>2: shared responsibility<br>3: full autonomy                                                                                                                                                  | <b>Q41_5_3</b><br>1: not allowed<br>2: under supervision<br>3: shared responsibility<br>4: full autonomy                                                                                                                         | <b>Q12a_5_3</b><br>1: not allowed<br>2: under supervision<br>3: shared responsibility<br>4: full autonomy                                             | <b>Q12a_1_3</b><br>1: not allowed<br>2: under supervision<br>3: shared responsibility<br>4: full autonomy                                             | <b>Q12a_6_3</b><br>1: not allowed<br>2: under supervision<br>3: shared responsibility<br>4: full autonomy                                             | <b>Q12a_7_3</b><br>1: not allowed<br>2: under supervision<br>3: shared responsibility<br>4: full autonomy                                             |
| recognising &<br>preventing risks /<br>complications /<br>medication errors                  | <b>Q12a_4_4_1</b><br>Ticked = 1<br>Not ticked = 0                                                        | <b>Q12a_2_4_1</b><br>Ticked = 1<br>Not ticked = 0                                                                                                                                    | <b>Q12a_3_4</b><br>1: under supervision<br>2: shared responsibility<br>3: full autonomy                                                                                                                                                  | <b>Q41_5_4</b><br>1: not allowed<br>2: under supervision<br>3: shared responsibility<br>4: full autonomy                                                                                                                         | <b>Q12a_5_4</b><br>1: not allowed<br>2: under supervision<br>3: shared responsibility<br>4: full autonomy                                             | <b>Q12a_1_4</b><br>1: not allowed<br>2: under supervision<br>3: shared responsibility<br>4: full autonomy                                             | <b>Q12a_6_4</b><br>1: not allowed<br>2: under supervision<br>3: shared responsibility<br>4: full autonomy                                             | <b>Q12a_7_4</b><br>1: not allowed<br>2: under supervision<br>3: shared responsibility<br>4: full autonomy                                             |
| identification, reporting<br>and addressing contra-<br>indications, drug<br>related problems | <b>Q12a_4_5_1</b><br>Ticked = 1<br>Not ticked = 0                                                        | <b>Q12a_2_5_1</b><br>Ticked = 1<br>Not ticked = 0                                                                                                                                    | <b>Q12a_3_5</b><br>1: under supervision<br>2: shared responsibility<br>3: full autonomy                                                                                                                                                  | <b>Q41_5_5</b><br>1: not allowed<br>2: under supervision<br>3: shared responsibility<br>4: full autonomy                                                                                                                         | <b>Q12a_5_5</b><br>1: not allowed<br>2: under supervision<br>3: shared responsibility<br>4: full autonomy                                             | <b>Q12a_1_5</b><br>1: not allowed<br>2: under supervision<br>3: shared responsibility<br>4: full autonomy                                             | <b>Q12a_6_5</b><br>1: not allowed<br>2: under supervision<br>3: shared responsibility<br>4: full autonomy                                             | <b>Q12a_7_5</b><br>1: not allowed<br>2: under supervision<br>3: shared responsibility<br>4: full autonomy                                             |
| follow-up                                                                                    | <b>Q12a_4_6_1</b><br>Ticked = 1<br>Not ticked = 0                                                        | <b>Q12a_2_6_1</b><br>Ticked = 1<br>Not ticked = 0                                                                                                                                    | <b>Q12a_3_6</b><br>1: under supervision<br>2: shared responsibility<br>3: full autonomy                                                                                                                                                  | <b>Q41_5_6</b><br>1: not allowed<br>2: under supervision<br>3: shared responsibility<br>4: full autonomy                                                                                                                         | <b>Q12a_5_6</b><br>1: not allowed<br>2: under supervision<br>3: shared responsibility<br>4: full autonomy                                             | <b>Q12a_1_6</b><br>1: not allowed<br>2: under supervision<br>3: shared responsibility<br>4: full autonomy                                             | <b>Q12a_6_6</b><br>1: not allowed<br>2: under supervision<br>3: shared responsibility<br>4: full autonomy                                             | <b>Q12a_7_6</b><br>1: not allowed<br>2: under supervision<br>3: shared responsibility<br>4: full autonomy                                             |
| evidence based practice                                                                      | <b>Q12a_4_7_1</b><br>Ticked = 1<br>Not ticked = 0                                                        | <b>Q12a_2_7_1</b><br>Ticked = 1<br>Not ticked = 0                                                                                                                                    | <b>Q12a_3_7</b><br>1: under supervision<br>2: shared responsibility<br>3: full autonomy                                                                                                                                                  | <b>Q41_5_7</b><br>1: not allowed<br>2: under supervision<br>3: shared responsibility                                                                                                                                             | <b>Q12a_5_7</b><br>1: not allowed<br>2: under supervision<br>3: shared responsibility                                                                 | <b>Q12a_1_7</b><br>1: not allowed<br>2: under supervision<br>3: shared responsibility                                                                 | <b>Q12a_6_7</b><br>1: not allowed<br>2: under supervision<br>3: shared responsibility                                                                 | <b>Q12a_7_7</b><br>1: not allowed<br>2: under supervision<br>3: shared responsibility                                                                 |

|                                                                                                                                                            |                                                    |                                                    |                                                                                          |                                                                                                           |                                                                                                            |                                                                                                            |                                                                                                            |                                                                                                            |
|------------------------------------------------------------------------------------------------------------------------------------------------------------|----------------------------------------------------|----------------------------------------------------|------------------------------------------------------------------------------------------|-----------------------------------------------------------------------------------------------------------|------------------------------------------------------------------------------------------------------------|------------------------------------------------------------------------------------------------------------|------------------------------------------------------------------------------------------------------------|------------------------------------------------------------------------------------------------------------|
|                                                                                                                                                            |                                                    |                                                    |                                                                                          | 4: full autonomy                                                                                          | 4: full autonomy                                                                                           | 4: full autonomy                                                                                           | 4: full autonomy                                                                                           | 4: full autonomy                                                                                           |
| decision making                                                                                                                                            | <b>Q12a_4_8_1</b><br>Ticked = 1<br>Not ticked = 0  | <b>Q12a_2_8_1</b><br>Ticked = 1<br>Not ticked = 0  | <b>Q12a_3_8</b><br>1: under supervision<br>2: shared responsibility<br>3: full autonomy  | <b>Q41_5_8</b><br>1: not allowed<br>2: under supervision<br>3: shared responsibility<br>4: full autonomy  | <b>Q12a_5_8</b><br>1: not allowed<br>2: under supervision<br>3: shared responsibility<br>4: full autonomy  | <b>Q12a_1_8</b><br>1: not allowed<br>2: under supervision<br>3: shared responsibility<br>4: full autonomy  | <b>Q12a_6_8</b><br>1: not allowed<br>2: under supervision<br>3: shared responsibility<br>4: full autonomy  | <b>Q12a_7_8</b><br>1: not allowed<br>2: under supervision<br>3: shared responsibility<br>4: full autonomy  |
| communication /discussion with patient/family                                                                                                              | <b>Q12a_4_9_1</b><br>Ticked = 1<br>Not ticked = 0  | <b>Q12a_2_9_1</b><br>Ticked = 1<br>Not ticked = 0  | <b>Q12a_3_9</b><br>1: under supervision<br>2: shared responsibility<br>3: full autonomy  | <b>Q41_5_9</b><br>1: not allowed<br>2: under supervision<br>3: shared responsibility<br>4: full autonomy  | <b>Q12a_5_9</b><br>1: not allowed<br>2: under supervision<br>3: shared responsibility<br>4: full autonomy  | <b>Q12a_1_9</b><br>1: not allowed<br>2: under supervision<br>3: shared responsibility<br>4: full autonomy  | <b>Q12a_6_9</b><br>1: not allowed<br>2: under supervision<br>3: shared responsibility<br>4: full autonomy  | <b>Q12a_7_9</b><br>1: not allowed<br>2: under supervision<br>3: shared responsibility<br>4: full autonomy  |
| motivational interviewing                                                                                                                                  | <b>Q12a_4_10_1</b><br>Ticked = 1<br>Not ticked = 0 | <b>Q12a_2_10_1</b><br>Ticked = 1<br>Not ticked = 0 | <b>Q12a_3_10</b><br>1: under supervision<br>2: shared responsibility<br>3: full autonomy | <b>Q41_5_10</b><br>1: not allowed<br>2: under supervision<br>3: shared responsibility<br>4: full autonomy | <b>Q12a_5_10</b><br>1: not allowed<br>2: under supervision<br>3: shared responsibility<br>4: full autonomy | <b>Q12a_1_10</b><br>1: not allowed<br>2: under supervision<br>3: shared responsibility<br>4: full autonomy | <b>Q12a_6_10</b><br>1: not allowed<br>2: under supervision<br>3: shared responsibility<br>4: full autonomy | <b>Q12a_7_10</b><br>1: not allowed<br>2: under supervision<br>3: shared responsibility<br>4: full autonomy |
| Inter / intraprofessional referrals                                                                                                                        | <b>Q12a_4_11_1</b><br>Ticked = 1<br>Not ticked = 0 | <b>Q12a_2_11_1</b><br>Ticked = 1<br>Not ticked = 0 | <b>Q12a_3_11</b><br>1: under supervision<br>2: shared responsibility<br>3: full autonomy | <b>Q41_5_11</b><br>1: not allowed<br>2: under supervision<br>3: shared responsibility<br>4: full autonomy | <b>Q12a_5_11</b><br>1: not allowed<br>2: under supervision<br>3: shared responsibility<br>4: full autonomy | <b>Q12a_1_11</b><br>1: not allowed<br>2: under supervision<br>3: shared responsibility<br>4: full autonomy | <b>Q12a_6_11</b><br>1: not allowed<br>2: under supervision<br>3: shared responsibility<br>4: full autonomy | <b>Q12a_7_11</b><br>1: not allowed<br>2: under supervision<br>3: shared responsibility<br>4: full autonomy |
| facilitation of medication management                                                                                                                      | <b>Q12a_4_13_1</b><br>Ticked = 1<br>Not ticked = 0 | <b>Q12a_2_13_1</b><br>Ticked = 1<br>Not ticked = 0 | <b>Q12a_3_13</b><br>1: under supervision<br>2: shared responsibility<br>3: full autonomy | <b>Q41_5_13</b><br>1: not allowed<br>2: under supervision<br>3: shared responsibility<br>4: full autonomy | <b>Q12a_5_13</b><br>1: not allowed<br>2: under supervision<br>3: shared responsibility<br>4: full autonomy | <b>Q12a_1_13</b><br>1: not allowed<br>2: under supervision<br>3: shared responsibility<br>4: full autonomy | <b>Q12a_6_13</b><br>1: not allowed<br>2: under supervision<br>3: shared responsibility<br>4: full autonomy | <b>Q12a_7_13</b><br>1: not allowed<br>2: under supervision<br>3: shared responsibility<br>4: full autonomy |
| selfcare support and therapeutic education                                                                                                                 | <b>Q12a_4_16_1</b><br>Ticked = 1<br>Not ticked = 0 | <b>Q12a_2_16_1</b><br>Ticked = 1<br>Not ticked = 0 | <b>Q12a_3_16</b><br>1: under supervision<br>2: shared responsibility<br>3: full autonomy | <b>Q41_5_16</b><br>1: not allowed<br>2: under supervision<br>3: shared responsibility<br>4: full autonomy | <b>Q12a_5_16</b><br>1: not allowed<br>2: under supervision<br>3: shared responsibility<br>4: full autonomy | <b>Q12a_1_16</b><br>1: not allowed<br>2: under supervision<br>3: shared responsibility<br>4: full autonomy | <b>Q12a_6_16</b><br>1: not allowed<br>2: under supervision<br>3: shared responsibility<br>4: full autonomy | <b>Q12a_7_16</b><br>1: not allowed<br>2: under supervision<br>3: shared responsibility<br>4: full autonomy |
| advice (patient or other healthcare professional)                                                                                                          | <b>Q12a_4_17_1</b><br>Ticked = 1<br>Not ticked = 0 | <b>Q12a_2_17_1</b><br>Ticked = 1<br>Not ticked = 0 | <b>Q12a_3_17</b><br>1: under supervision<br>2: shared responsibility<br>3: full autonomy | <b>Q41_5_17</b><br>1: not allowed<br>2: under supervision<br>3: shared responsibility<br>4: full autonomy | <b>Q12a_5_17</b><br>1: not allowed<br>2: under supervision<br>3: shared responsibility<br>4: full autonomy | <b>Q12a_1_17</b><br>1: not allowed<br>2: under supervision<br>3: shared responsibility<br>4: full autonomy | <b>Q12a_6_17</b><br>1: not allowed<br>2: under supervision<br>3: shared responsibility<br>4: full autonomy | <b>Q12a_7_17</b><br>1: not allowed<br>2: under supervision<br>3: shared responsibility<br>4: full autonomy |
| transitional care communication, inter / intraprofessional collaboration / communication including reporting, advising, informing, alerting and discussing | <b>Q12a_4_18_1</b><br>Ticked = 1<br>Not ticked = 0 | <b>Q12a_2_18_1</b><br>Ticked = 1<br>Not ticked = 0 | <b>Q12a_3_18</b><br>1: under supervision<br>2: shared responsibility<br>3: full autonomy | <b>Q41_5_18</b><br>1: not allowed<br>2: under supervision<br>3: shared responsibility<br>4: full autonomy | <b>Q12a_5_18</b><br>1: not allowed<br>2: under supervision<br>3: shared responsibility<br>4: full autonomy | <b>Q12a_1_18</b><br>1: not allowed<br>2: under supervision<br>3: shared responsibility<br>4: full autonomy | <b>Q12a_6_18</b><br>1: not allowed<br>2: under supervision<br>3: shared responsibility<br>4: full autonomy | <b>Q12a_7_18</b><br>1: not allowed<br>2: under supervision<br>3: shared responsibility<br>4: full autonomy |
| collegial mentoring                                                                                                                                        | <b>Q12a_4_19_1</b><br>Ticked = 1<br>Not ticked = 0 | <b>Q12a_2_19_1</b><br>Ticked = 1<br>Not ticked = 0 | <b>Q12a_3_19</b><br>1: under supervision<br>2: shared responsibility<br>3: full autonomy | <b>Q41_5_19</b><br>1: not allowed<br>2: under supervision<br>3: shared responsibility<br>4: full autonomy | <b>Q12a_5_19</b><br>1: not allowed<br>2: under supervision<br>3: shared responsibility<br>4: full autonomy | <b>Q12a_1_19</b><br>1: not allowed<br>2: under supervision<br>3: shared responsibility<br>4: full autonomy | <b>Q12a_6_19</b><br>1: not allowed<br>2: under supervision<br>3: shared responsibility<br>4: full autonomy | <b>Q12a_7_19</b><br>1: not allowed<br>2: under supervision<br>3: shared responsibility<br>4: full autonomy |



|                                                                     |                                                                                        |                                                                                        |                                                                                                                              |                                                                                                                                              |                                                                                                                                                |                                                                                                                                                |                                                                                                                                                |                                                                                                                                                |
|---------------------------------------------------------------------|----------------------------------------------------------------------------------------|----------------------------------------------------------------------------------------|------------------------------------------------------------------------------------------------------------------------------|----------------------------------------------------------------------------------------------------------------------------------------------|------------------------------------------------------------------------------------------------------------------------------------------------|------------------------------------------------------------------------------------------------------------------------------------------------|------------------------------------------------------------------------------------------------------------------------------------------------|------------------------------------------------------------------------------------------------------------------------------------------------|
| other task within management of patient medication self-management: | <b>Q12a_4_20_1</b><br>Ticked = 1<br>Not ticked = 0<br><b>Q12a_4_20_T</b><br><b>EXT</b> | <b>Q12a_2_20_1</b><br>Ticked = 1<br>Not ticked = 0<br><b>Q12a_2_20_T</b><br><b>EXT</b> | <b>Q12a_3_20</b><br>1: under supervision<br>2: shared responsibility<br>3: full autonomy<br><b>Q12a_3_20_</b><br><b>TEXT</b> | <b>Q41_5_20</b><br>1: not allowed<br>2: under supervision<br>3: shared responsibility<br>4: full autonomy<br><b>Q41_5_20_T</b><br><b>EXT</b> | <b>Q12a_5_20</b><br>1: not allowed<br>2: under supervision<br>3: shared responsibility<br>4: full autonomy<br><b>Q12a_5_20_</b><br><b>TEXT</b> | <b>Q12a_1_20</b><br>1: not allowed<br>2: under supervision<br>3: shared responsibility<br>4: full autonomy<br><b>Q12a_1_20_</b><br><b>TEXT</b> | <b>Q12a_6_20</b><br>1: not allowed<br>2: under supervision<br>3: shared responsibility<br>4: full autonomy<br><b>Q12a_6_20_</b><br><b>TEXT</b> | <b>Q12a_7_20</b><br>1: not allowed<br>2: under supervision<br>3: shared responsibility<br>4: full autonomy<br><b>Q12a_7_20_</b><br><b>TEXT</b> |
|---------------------------------------------------------------------|----------------------------------------------------------------------------------------|----------------------------------------------------------------------------------------|------------------------------------------------------------------------------------------------------------------------------|----------------------------------------------------------------------------------------------------------------------------------------------|------------------------------------------------------------------------------------------------------------------------------------------------|------------------------------------------------------------------------------------------------------------------------------------------------|------------------------------------------------------------------------------------------------------------------------------------------------|------------------------------------------------------------------------------------------------------------------------------------------------|

#### Q13a/ RESPONSIBILITY 4: management of patient education and information.

|                                                  | <b>Task <u>not</u> relevant</b><br>within management of patient education and information. (skip following columns, when this options is ticked) | <b>Task <u>not</u> allowed</b><br>for nurses within management of patient education and information. (skip following columns, when this options is ticked) | Task allowed for <b>all levels</b> of nurses within management of patient education and information. Specify the level of responsibility. (skip following columns, when this options is ticked) | Specify the level of responsibility for <b>level 4</b> nurses performing this task within management of patient education and information<br><b>Variable only applicable in Germany and the Netherlands</b> | Specify the level of responsibility for <b>level 5</b> nurses performing this task within management of patient education and information | Specify the level of responsibility for <b>level 6</b> nurses performing this task within management of patient education and information | Specify the level of responsibility for <b>level 7</b> nurses performing this task within management of patient education and information | Specify the level of responsibility for <b>level 8</b> nurses performing this task within management of patient education and information |
|--------------------------------------------------|--------------------------------------------------------------------------------------------------------------------------------------------------|------------------------------------------------------------------------------------------------------------------------------------------------------------|-------------------------------------------------------------------------------------------------------------------------------------------------------------------------------------------------|-------------------------------------------------------------------------------------------------------------------------------------------------------------------------------------------------------------|-------------------------------------------------------------------------------------------------------------------------------------------|-------------------------------------------------------------------------------------------------------------------------------------------|-------------------------------------------------------------------------------------------------------------------------------------------|-------------------------------------------------------------------------------------------------------------------------------------------|
| observation, documentation, registration, report | <b>Q13a_4_1_1</b><br>Ticked = 1<br>Not ticked = 0                                                                                                | <b>Q13a_2_1_1</b><br>Ticked = 1<br>Not ticked = 0                                                                                                          | <b>Q13a_3_1</b><br>1: under supervision<br>2: shared responsibility<br>3: full autonomy                                                                                                         | <b>Q40_5_1</b><br>1: not allowed<br>2: under supervision<br>3: shared responsibility<br>4: full autonomy                                                                                                    | <b>Q13a_5_1</b><br>1: not allowed<br>2: under supervision<br>3: shared responsibility<br>4: full autonomy                                 | <b>Q13a_1_1</b><br>1: not allowed<br>2: under supervision<br>3: shared responsibility<br>4: full autonomy                                 | <b>Q12a_6_1</b><br>1: not allowed<br>2: under supervision<br>3: shared responsibility<br>4: full autonomy                                 | <b>Q12a_7_1</b><br>1: not allowed<br>2: under supervision<br>3: shared responsibility<br>4: full autonomy                                 |
| assessing patients competences                   | <b>Q13a_4_2_1</b><br>Ticked = 1<br>Not ticked = 0                                                                                                | <b>Q13a_2_2_1</b><br>Ticked = 1<br>Not ticked = 0                                                                                                          | <b>Q13a_3_2</b><br>1: under supervision<br>2: shared responsibility<br>3: full autonomy                                                                                                         | <b>Q40_5_2</b><br>1: not allowed<br>2: under supervision<br>3: shared responsibility<br>4: full autonomy                                                                                                    | <b>Q13a_5_2</b><br>1: not allowed<br>2: under supervision<br>3: shared responsibility<br>4: full autonomy                                 | <b>Q13a_1_2</b><br>1: not allowed<br>2: under supervision<br>3: shared responsibility<br>4: full autonomy                                 | <b>Q13a_6_2</b><br>1: not allowed<br>2: under supervision<br>3: shared responsibility<br>4: full autonomy                                 | <b>Q12a_7_2</b><br>1: not allowed<br>2: under supervision<br>3: shared responsibility<br>4: full autonomy                                 |
| assessment and addressing patient/family needs   | <b>Q13a_4_3_1</b><br>Ticked = 1<br>Not ticked = 0                                                                                                | <b>Q13a_2_3_1</b><br>Ticked = 1<br>Not ticked = 0                                                                                                          | <b>Q13a_3_3</b><br>1: under supervision<br>2: shared responsibility<br>3: full autonomy                                                                                                         | <b>Q40_5_3</b><br>1: not allowed<br>2: under supervision<br>3: shared responsibility<br>4: full autonomy                                                                                                    | <b>Q13a_5_3</b><br>1: not allowed<br>2: under supervision<br>3: shared responsibility<br>4: full autonomy                                 | <b>Q13a_1_3</b><br>1: not allowed<br>2: under supervision<br>3: shared responsibility<br>4: full autonomy                                 | <b>Q12a_6_3</b><br>1: not allowed<br>2: under supervision<br>3: shared responsibility<br>4: full autonomy                                 | <b>Q12a_7_3</b><br>1: not allowed<br>2: under supervision<br>3: shared responsibility<br>4: full autonomy                                 |
| follow-up                                        | <b>Q13a_4_4_1</b><br>Ticked = 1<br>Not ticked = 0                                                                                                | <b>Q13a_2_4_1</b><br>Ticked = 1<br>Not ticked = 0                                                                                                          | <b>Q13a_3_4</b><br>1: under supervision<br>2: shared responsibility<br>3: full autonomy                                                                                                         | <b>Q40_5_4</b><br>1: not allowed<br>2: under supervision<br>3: shared responsibility<br>4: full autonomy                                                                                                    | <b>Q13a_5_4</b><br>1: not allowed<br>2: under supervision<br>3: shared responsibility<br>4: full autonomy                                 | <b>Q13a_1_4</b><br>1: not allowed<br>2: under supervision<br>3: shared responsibility<br>4: full autonomy                                 | <b>Q12a_6_4</b><br>1: not allowed<br>2: under supervision<br>3: shared responsibility<br>4: full autonomy                                 | <b>Q12a_7_4</b><br>1: not allowed<br>2: under supervision<br>3: shared responsibility<br>4: full autonomy                                 |
| evidence based practice                          | <b>Q13a_4_5_1</b>                                                                                                                                | <b>Q13a_2_5_1</b>                                                                                                                                          | <b>Q13a_3_5</b>                                                                                                                                                                                 | <b>Q40_5_5</b>                                                                                                                                                                                              | <b>Q13a_5_5</b>                                                                                                                           | <b>Q13a_1_5</b>                                                                                                                           | <b>Q13a_6_5</b>                                                                                                                           | <b>Q13a_7_5</b>                                                                                                                           |

|                                                                                                                                                                                 |                                                    |                                                    |                                                                                          |                                                                                                           |                                                                                                            |                                                                                                            |                                                                                                            |                                                                                                            |
|---------------------------------------------------------------------------------------------------------------------------------------------------------------------------------|----------------------------------------------------|----------------------------------------------------|------------------------------------------------------------------------------------------|-----------------------------------------------------------------------------------------------------------|------------------------------------------------------------------------------------------------------------|------------------------------------------------------------------------------------------------------------|------------------------------------------------------------------------------------------------------------|------------------------------------------------------------------------------------------------------------|
|                                                                                                                                                                                 | Ticked = 1<br>Not ticked = 0                       | Ticked = 1<br>Not ticked = 0                       | 1: under supervision<br>2: shared responsibility<br>3: full autonomy                     | 1: not allowed<br>2: under supervision<br>3: shared responsibility<br>4: full autonomy                    | 1: not allowed<br>2: under supervision<br>3: shared responsibility<br>4: full autonomy                     | 1: not allowed<br>2: under supervision<br>3: shared responsibility<br>4: full autonomy                     | 1: not allowed<br>2: under supervision<br>3: shared responsibility<br>4: full autonomy                     | 1: not allowed<br>2: under supervision<br>3: shared responsibility<br>4: full autonomy                     |
| decision making                                                                                                                                                                 | <b>Q13a_4_6_1</b><br>Ticked = 1<br>Not ticked = 0  | <b>Q13a_2_6_1</b><br>Ticked = 1<br>Not ticked = 0  | <b>Q13a_3_6</b><br>1: under supervision<br>2: shared responsibility<br>3: full autonomy  | <b>Q40_5_6</b><br>1: not allowed<br>2: under supervision<br>3: shared responsibility<br>4: full autonomy  | <b>Q13a_5_6</b><br>1: not allowed<br>2: under supervision<br>3: shared responsibility<br>4: full autonomy  | <b>Q13a_1_6</b><br>1: not allowed<br>2: under supervision<br>3: shared responsibility<br>4: full autonomy  | <b>Q13a_6_6</b><br>1: not allowed<br>2: under supervision<br>3: shared responsibility<br>4: full autonomy  | <b>Q13a_7_6</b><br>1: not allowed<br>2: under supervision<br>3: shared responsibility<br>4: full autonomy  |
| communication<br>/discussion with<br>patient/family                                                                                                                             | <b>Q13a_4_7_1</b><br>Ticked = 1<br>Not ticked = 0  | <b>Q13a_2_7_1</b><br>Ticked = 1<br>Not ticked = 0  | <b>Q13a_3_7</b><br>1: under supervision<br>2: shared responsibility<br>3: full autonomy  | <b>Q40_5_7</b><br>1: not allowed<br>2: under supervision<br>3: shared responsibility<br>4: full autonomy  | <b>Q13a_5_7</b><br>1: not allowed<br>2: under supervision<br>3: shared responsibility<br>4: full autonomy  | <b>Q13a_1_7</b><br>1: not allowed<br>2: under supervision<br>3: shared responsibility<br>4: full autonomy  | <b>Q13a_6_7</b><br>1: not allowed<br>2: under supervision<br>3: shared responsibility<br>4: full autonomy  | <b>Q13a_7_7</b><br>1: not allowed<br>2: under supervision<br>3: shared responsibility<br>4: full autonomy  |
| motivational interviewing                                                                                                                                                       | <b>Q13a_4_8_1</b><br>Ticked = 1<br>Not ticked = 0  | <b>Q13a_2_8_1</b><br>Ticked = 1<br>Not ticked = 0  | <b>Q13a_3_8</b><br>1: under supervision<br>2: shared responsibility<br>3: full autonomy  | <b>Q40_5_8</b><br>1: not allowed<br>2: under supervision<br>3: shared responsibility<br>4: full autonomy  | <b>Q13a_5_8</b><br>1: not allowed<br>2: under supervision<br>3: shared responsibility<br>4: full autonomy  | <b>Q13a_1_8</b><br>1: not allowed<br>2: under supervision<br>3: shared responsibility<br>4: full autonomy  | <b>Q13a_6_8</b><br>1: not allowed<br>2: under supervision<br>3: shared responsibility<br>4: full autonomy  | <b>Q13a_7_8</b><br>1: not allowed<br>2: under supervision<br>3: shared responsibility<br>4: full autonomy  |
| Inter / intraprofessional<br>referrals                                                                                                                                          | <b>Q13a_4_9_1</b><br>Ticked = 1<br>Not ticked = 0  | <b>Q13a_2_9_1</b><br>Ticked = 1<br>Not ticked = 0  | <b>Q13a_3_9</b><br>1: under supervision<br>2: shared responsibility<br>3: full autonomy  | <b>Q40_5_9</b><br>1: not allowed<br>2: under supervision<br>3: shared responsibility<br>4: full autonomy  | <b>Q13a_5_9</b><br>1: not allowed<br>2: under supervision<br>3: shared responsibility<br>4: full autonomy  | <b>Q13a_1_9</b><br>1: not allowed<br>2: under supervision<br>3: shared responsibility<br>4: full autonomy  | <b>Q13a_6_9</b><br>1: not allowed<br>2: under supervision<br>3: shared responsibility<br>4: full autonomy  | <b>Q13a_7_9</b><br>1: not allowed<br>2: under supervision<br>3: shared responsibility<br>4: full autonomy  |
| facilitation of medication<br>management                                                                                                                                        | <b>Q13a_4_11_1</b><br>Ticked = 1<br>Not ticked = 0 | <b>Q13a_2_11_1</b><br>Ticked = 1<br>Not ticked = 0 | <b>Q13a_3_11</b><br>1: under supervision<br>2: shared responsibility<br>3: full autonomy | <b>Q40_5_11</b><br>1: not allowed<br>2: under supervision<br>3: shared responsibility<br>4: full autonomy | <b>Q13a_5_11</b><br>1: not allowed<br>2: under supervision<br>3: shared responsibility<br>4: full autonomy | <b>Q13a_1_11</b><br>1: not allowed<br>2: under supervision<br>3: shared responsibility<br>4: full autonomy | <b>Q13a_6_11</b><br>1: not allowed<br>2: under supervision<br>3: shared responsibility<br>4: full autonomy | <b>Q13a_7_11</b><br>1: not allowed<br>2: under supervision<br>3: shared responsibility<br>4: full autonomy |
| selfcare support and<br>therapeutic education                                                                                                                                   | <b>Q13a_4_14_1</b><br>Ticked = 1<br>Not ticked = 0 | <b>Q13a_2_14_1</b><br>Ticked = 1<br>Not ticked = 0 | <b>Q13a_3_14</b><br>1: under supervision<br>2: shared responsibility<br>3: full autonomy | <b>Q40_5_14</b><br>1: not allowed<br>2: under supervision<br>3: shared responsibility<br>4: full autonomy | <b>Q13a_5_14</b><br>1: not allowed<br>2: under supervision<br>3: shared responsibility<br>4: full autonomy | <b>Q13a_1_14</b><br>1: not allowed<br>2: under supervision<br>3: shared responsibility<br>4: full autonomy | <b>Q13a_6_14</b><br>1: not allowed<br>2: under supervision<br>3: shared responsibility<br>4: full autonomy | <b>Q13a_7_14</b><br>1: not allowed<br>2: under supervision<br>3: shared responsibility<br>4: full autonomy |
| advice (patient or other<br>healthcare professional)                                                                                                                            | <b>Q13a_4_15_1</b><br>Ticked = 1<br>Not ticked = 0 | <b>Q13a_2_15_1</b><br>Ticked = 1<br>Not ticked = 0 | <b>Q13a_3_15</b><br>1: under supervision<br>2: shared responsibility<br>3: full autonomy | <b>Q40_5_15</b><br>1: not allowed<br>2: under supervision<br>3: shared responsibility<br>4: full autonomy | <b>Q13a_5_15</b><br>1: not allowed<br>2: under supervision<br>3: shared responsibility<br>4: full autonomy | <b>Q13a_1_15</b><br>1: not allowed<br>2: under supervision<br>3: shared responsibility<br>4: full autonomy | <b>Q13a_6_15</b><br>1: not allowed<br>2: under supervision<br>3: shared responsibility<br>4: full autonomy | <b>Q13a_7_15</b><br>1: not allowed<br>2: under supervision<br>3: shared responsibility<br>4: full autonomy |
| transitional care<br>communication, inter /<br>intraprofessional<br>collaboration /<br>communication including<br>reporting, advising,<br>informing, alerting and<br>discussing | <b>Q13a_4_16_1</b><br>Ticked = 1<br>Not ticked = 0 | <b>Q13a_2_16_1</b><br>Ticked = 1<br>Not ticked = 0 | <b>Q13a_3_16</b><br>1: under supervision<br>2: shared responsibility<br>3: full autonomy | <b>Q40_5_16</b><br>1: not allowed<br>2: under supervision<br>3: shared responsibility<br>4: full autonomy | <b>Q13a_5_16</b><br>1: not allowed<br>2: under supervision<br>3: shared responsibility<br>4: full autonomy | <b>Q13a_1_16</b><br>1: not allowed<br>2: under supervision<br>3: shared responsibility<br>4: full autonomy | <b>Q13a_6_16</b><br>1: not allowed<br>2: under supervision<br>3: shared responsibility<br>4: full autonomy | <b>Q13a_7_16</b><br>1: not allowed<br>2: under supervision<br>3: shared responsibility<br>4: full autonomy |
| collegial mentoring                                                                                                                                                             | <b>Q13a_4_17_1</b><br>Ticked = 1                   | <b>Q13a_2_17_1</b><br>Ticked = 1                   | <b>Q13a_3_17</b><br>1: under supervision<br>2: shared responsibility                     | <b>Q40_5_17</b><br>1: not allowed<br>2: under supervision                                                 | <b>Q13a_5_17</b><br>1: not allowed<br>2: under supervision                                                 | <b>Q13a_1_17</b><br>1: not allowed<br>2: under supervision                                                 | <b>Q13a_6_17</b><br>1: not allowed<br>2: under supervision                                                 | <b>Q13a_7_17</b><br>1: not allowed<br>2: under supervision                                                 |

|                                                                    | Not ticked = 0                                                                  | Ticked = 1<br>Not ticked = 0                                                | 3: full autonomy                                                                                                  | 3: shared responsibility<br>4: full autonomy                                                                                          | 3: shared responsibility<br>4: full autonomy                                                                                        | 3: shared responsibility<br>4: full autonomy                                                                                        | 3: shared responsibility<br>4: full autonomy                                                                                        | 3: shared responsibility<br>4: full autonomy                                                                                        |
|--------------------------------------------------------------------|---------------------------------------------------------------------------------|-----------------------------------------------------------------------------|-------------------------------------------------------------------------------------------------------------------|---------------------------------------------------------------------------------------------------------------------------------------|-------------------------------------------------------------------------------------------------------------------------------------|-------------------------------------------------------------------------------------------------------------------------------------|-------------------------------------------------------------------------------------------------------------------------------------|-------------------------------------------------------------------------------------------------------------------------------------|
| other task within management of patient education and information: | <b>Q13a_4_18_1</b><br>Ticked = 1<br>Not ticked = 0<br><b>Q13a_4_18_T</b><br>EXT | <b>Q13a_2_18_1</b><br>Ticked = 1<br>Not ticked = 0<br><b>Q13a_2_18_TEXT</b> | <b>Q13a_3_18</b><br>1: under supervision<br>2: shared responsibility<br>3: full autonomy<br><b>Q13a_2_18_TEXT</b> | <b>Q40_5_18</b><br>1: not allowed<br>2: under supervision<br>3: shared responsibility<br>4: full autonomy<br><b>Q40_5_18_T</b><br>EXT | <b>Q13a_5_18</b><br>1: not allowed<br>2: under supervision<br>3: shared responsibility<br>4: full autonomy<br><b>Q13a_5_18_TEXT</b> | <b>Q13a_1_18</b><br>1: not allowed<br>2: under supervision<br>3: shared responsibility<br>4: full autonomy<br><b>Q13a_1_18_TEXT</b> | <b>Q13a_6_18</b><br>1: not allowed<br>2: under supervision<br>3: shared responsibility<br>4: full autonomy<br><b>Q13a_6_18_TEXT</b> | <b>Q13a_7_18</b><br>1: not allowed<br>2: under supervision<br>3: shared responsibility<br>4: full autonomy<br><b>Q13a_7_18_TEXT</b> |

#### Q14a/ RESPONSIBILITY 5: prescription management.

|                                                                    | Task <b>not</b> relevant within prescription management. (skip following columns, when this options is ticked) | Task <b>not</b> allowed for nurses within prescription management. (skip following columns, when this options is ticked) | Task allowed for <b>all levels</b> of nurses within prescription management. Specify the level of responsibility. (skip following columns, when this options is ticked) | Specify the level of responsibility for <b>level 4</b> nurses performing this task within prescription management<br>Variable only applicable in Germany and the Netherlands | Specify the level of responsibility for <b>level 5</b> nurses performing this task within prescription management | Specify the level of responsibility for <b>level 6</b> nurses performing this task within prescription management | Specify the level of responsibility for <b>level 7</b> nurses performing this task within prescription management | Specify the level of responsibility for <b>level 8</b> nurses performing this task within prescription management |
|--------------------------------------------------------------------|----------------------------------------------------------------------------------------------------------------|--------------------------------------------------------------------------------------------------------------------------|-------------------------------------------------------------------------------------------------------------------------------------------------------------------------|------------------------------------------------------------------------------------------------------------------------------------------------------------------------------|-------------------------------------------------------------------------------------------------------------------|-------------------------------------------------------------------------------------------------------------------|-------------------------------------------------------------------------------------------------------------------|-------------------------------------------------------------------------------------------------------------------|
| observation, documentation, registration, report                   | <b>Q14a_4_1_1</b><br>Ticked = 1<br>Not ticked = 0                                                              | <b>Q14a_2_1_1</b><br>Ticked = 1<br>Not ticked = 0                                                                        | <b>Q14a_3_1</b><br>1: under supervision<br>2: shared responsibility<br>3: full autonomy                                                                                 | <b>Q39_5_1</b><br>1: not allowed<br>2: under supervision<br>3: shared responsibility<br>4: full autonomy                                                                     | <b>Q14a_5_1</b><br>1: not allowed<br>2: under supervision<br>3: shared responsibility<br>4: full autonomy         | <b>Q14a_1_1</b><br>1: not allowed<br>2: under supervision<br>3: shared responsibility<br>4: full autonomy         | <b>Q14a_6_1</b><br>1: not allowed<br>2: under supervision<br>3: shared responsibility<br>4: full autonomy         | <b>Q14a_7_1</b><br>1: not allowed<br>2: under supervision<br>3: shared responsibility<br>4: full autonomy         |
| assessing patients competences                                     | <b>Q14a_4_2_1</b><br>Ticked = 1<br>Not ticked = 0                                                              | <b>Q14a_2_2_1</b><br>Ticked = 1<br>Not ticked = 0                                                                        | <b>Q14a_3_2</b><br>1: under supervision<br>2: shared responsibility<br>3: full autonomy                                                                                 | <b>Q39_5_2</b><br>1: not allowed<br>2: under supervision<br>3: shared responsibility<br>4: full autonomy                                                                     | <b>Q14a_5_2</b><br>1: not allowed<br>2: under supervision<br>3: shared responsibility<br>4: full autonomy         | <b>Q14a_1_2</b><br>1: not allowed<br>2: under supervision<br>3: shared responsibility<br>4: full autonomy         | <b>Q14a_6_2</b><br>1: not allowed<br>2: under supervision<br>3: shared responsibility<br>4: full autonomy         | <b>Q14a_7_2</b><br>1: not allowed<br>2: under supervision<br>3: shared responsibility<br>4: full autonomy         |
| assessment and addressing patient/family needs                     | <b>Q14a_4_4_1</b><br>Ticked = 1<br>Not ticked = 0                                                              | <b>Q14a_2_4_1</b><br>Ticked = 1<br>Not ticked = 0                                                                        | <b>Q14a_3_4</b><br>1: under supervision<br>2: shared responsibility<br>3: full autonomy                                                                                 | <b>Q39_5_4</b><br>1: not allowed<br>2: under supervision<br>3: shared responsibility<br>4: full autonomy                                                                     | <b>Q14a_5_4</b><br>1: not allowed<br>2: under supervision<br>3: shared responsibility<br>4: full autonomy         | <b>Q14a_1_4</b><br>1: not allowed<br>2: under supervision<br>3: shared responsibility<br>4: full autonomy         | <b>Q14a_6_4</b><br>1: not allowed<br>2: under supervision<br>3: shared responsibility<br>4: full autonomy         | <b>Q14a_7_4</b><br>1: not allowed<br>2: under supervision<br>3: shared responsibility<br>4: full autonomy         |
| recognising & preventing risks / complications / medication errors | <b>Q14a_4_5_1</b><br>Ticked = 1<br>Not ticked = 0                                                              | <b>Q14a_2_5_1</b><br>Ticked = 1<br>Not ticked = 0                                                                        | <b>Q14a_3_5</b><br>1: under supervision<br>2: shared responsibility<br>3: full autonomy                                                                                 | <b>Q39_5_5</b><br>1: not allowed<br>2: under supervision<br>3: shared responsibility<br>4: full autonomy                                                                     | <b>Q14a_5_5</b><br>1: not allowed<br>2: under supervision<br>3: shared responsibility<br>4: full autonomy         | <b>Q14a_1_5</b><br>1: not allowed<br>2: under supervision<br>3: shared responsibility<br>4: full autonomy         | <b>Q14a_6_5</b><br>1: not allowed<br>2: under supervision<br>3: shared responsibility<br>4: full autonomy         | <b>Q14a_7_5</b><br>1: not allowed<br>2: under supervision<br>3: shared responsibility<br>4: full autonomy         |

|                                                                                    |                                                    |                                                    |                                                                                          |                                                                                                           |                                                                                                            |                                                                                                            |                                                                                                            |                                                                                                            |
|------------------------------------------------------------------------------------|----------------------------------------------------|----------------------------------------------------|------------------------------------------------------------------------------------------|-----------------------------------------------------------------------------------------------------------|------------------------------------------------------------------------------------------------------------|------------------------------------------------------------------------------------------------------------|------------------------------------------------------------------------------------------------------------|------------------------------------------------------------------------------------------------------------|
| identification, reporting and addressing contra-indications, drug related problems | <b>Q14a_4_6_1</b><br>Ticked = 1<br>Not ticked = 0  | <b>Q14a_2_6_1</b><br>Ticked = 1<br>Not ticked = 0  | <b>Q14a_3_6</b><br>1: under supervision<br>2: shared responsibility<br>3: full autonomy  | <b>Q39_5_6</b><br>1: not allowed<br>2: under supervision<br>3: shared responsibility<br>4: full autonomy  | <b>Q14a_5_6</b><br>1: not allowed<br>2: under supervision<br>3: shared responsibility<br>4: full autonomy  | <b>Q14a_1_6</b><br>1: not allowed<br>2: under supervision<br>3: shared responsibility<br>4: full autonomy  | <b>Q14a_6_6</b><br>1: not allowed<br>2: under supervision<br>3: shared responsibility<br>4: full autonomy  | <b>Q14a_7_6</b><br>1: not allowed<br>2: under supervision<br>3: shared responsibility<br>4: full autonomy  |
| follow-up                                                                          | <b>Q14a_4_7_1</b><br>Ticked = 1<br>Not ticked = 0  | <b>Q14a_2_7_1</b><br>Ticked = 1<br>Not ticked = 0  | <b>Q14a_3_7</b><br>1: under supervision<br>2: shared responsibility<br>3: full autonomy  | <b>Q39_5_7</b><br>1: not allowed<br>2: under supervision<br>3: shared responsibility<br>4: full autonomy  | <b>Q14a_5_7</b><br>1: not allowed<br>2: under supervision<br>3: shared responsibility<br>4: full autonomy  | <b>Q14a_1_7</b><br>1: not allowed<br>2: under supervision<br>3: shared responsibility<br>4: full autonomy  | <b>Q14a_6_7</b><br>1: not allowed<br>2: under supervision<br>3: shared responsibility<br>4: full autonomy  | <b>Q14a_7_7</b><br>1: not allowed<br>2: under supervision<br>3: shared responsibility<br>4: full autonomy  |
| evidence based practice                                                            | <b>Q14a_4_8_1</b><br>Ticked = 1<br>Not ticked = 0  | <b>Q14a_2_8_1</b><br>Ticked = 1<br>Not ticked = 0  | <b>Q14a_3_8</b><br>1: under supervision<br>2: shared responsibility<br>3: full autonomy  | <b>Q39_5_8</b><br>1: not allowed<br>2: under supervision<br>3: shared responsibility<br>4: full autonomy  | <b>Q14a_5_8</b><br>1: not allowed<br>2: under supervision<br>3: shared responsibility<br>4: full autonomy  | <b>Q14a_1_8</b><br>1: not allowed<br>2: under supervision<br>3: shared responsibility<br>4: full autonomy  | <b>Q14a_6_8</b><br>1: not allowed<br>2: under supervision<br>3: shared responsibility<br>4: full autonomy  | <b>Q14a_7_8</b><br>1: not allowed<br>2: under supervision<br>3: shared responsibility<br>4: full autonomy  |
| decision making                                                                    | <b>Q14a_4_9_1</b><br>Ticked = 1<br>Not ticked = 0  | <b>Q14a_2_9_1</b><br>Ticked = 1<br>Not ticked = 0  | <b>Q14a_3_9</b><br>1: under supervision<br>2: shared responsibility<br>3: full autonomy  | <b>Q39_5_9</b><br>1: not allowed<br>2: under supervision<br>3: shared responsibility<br>4: full autonomy  | <b>Q14a_5_9</b><br>1: not allowed<br>2: under supervision<br>3: shared responsibility<br>4: full autonomy  | <b>Q14a_1_9</b><br>1: not allowed<br>2: under supervision<br>3: shared responsibility<br>4: full autonomy  | <b>Q14a_6_9</b><br>1: not allowed<br>2: under supervision<br>3: shared responsibility<br>4: full autonomy  | <b>Q14a_7_9</b><br>1: not allowed<br>2: under supervision<br>3: shared responsibility<br>4: full autonomy  |
| communication /discussion with patient/family                                      | <b>Q14a_4_10_1</b><br>Ticked = 1<br>Not ticked = 0 | <b>Q14a_2_10_1</b><br>Ticked = 1<br>Not ticked = 0 | <b>Q14a_3_10</b><br>1: under supervision<br>2: shared responsibility<br>3: full autonomy | <b>Q39_5_10</b><br>1: not allowed<br>2: under supervision<br>3: shared responsibility<br>4: full autonomy | <b>Q14a_5_10</b><br>1: not allowed<br>2: under supervision<br>3: shared responsibility<br>4: full autonomy | <b>Q14a_1_10</b><br>1: not allowed<br>2: under supervision<br>3: shared responsibility<br>4: full autonomy | <b>Q14a_6_10</b><br>1: not allowed<br>2: under supervision<br>3: shared responsibility<br>4: full autonomy | <b>Q14a_7_10</b><br>1: not allowed<br>2: under supervision<br>3: shared responsibility<br>4: full autonomy |
| Inter / intraprofessional referrals                                                | <b>Q14a_4_11_1</b><br>Ticked = 1<br>Not ticked = 0 | <b>Q14a_2_11_1</b><br>Ticked = 1<br>Not ticked = 0 | <b>Q14a_3_11</b><br>1: under supervision<br>2: shared responsibility<br>3: full autonomy | <b>Q39_5_11</b><br>1: not allowed<br>2: under supervision<br>3: shared responsibility<br>4: full autonomy | <b>Q14a_5_11</b><br>1: not allowed<br>2: under supervision<br>3: shared responsibility<br>4: full autonomy | <b>Q14a_1_11</b><br>1: not allowed<br>2: under supervision<br>3: shared responsibility<br>4: full autonomy | <b>Q14a_6_11</b><br>1: not allowed<br>2: under supervision<br>3: shared responsibility<br>4: full autonomy | <b>Q14a_7_11</b><br>1: not allowed<br>2: under supervision<br>3: shared responsibility<br>4: full autonomy |
| facilitation of medication management                                              | <b>Q14a_4_13_1</b><br>Ticked = 1<br>Not ticked = 0 | <b>Q14a_2_13_1</b><br>Ticked = 1<br>Not ticked = 0 | <b>Q14a_3_13</b><br>1: under supervision<br>2: shared responsibility<br>3: full autonomy | <b>Q39_5_13</b><br>1: not allowed<br>2: under supervision<br>3: shared responsibility<br>4: full autonomy | <b>Q14a_5_13</b><br>1: not allowed<br>2: under supervision<br>3: shared responsibility<br>4: full autonomy | <b>Q14a_1_13</b><br>1: not allowed<br>2: under supervision<br>3: shared responsibility<br>4: full autonomy | <b>Q14a_6_13</b><br>1: not allowed<br>2: under supervision<br>3: shared responsibility<br>4: full autonomy | <b>Q14a_7_13</b><br>1: not allowed<br>2: under supervision<br>3: shared responsibility<br>4: full autonomy |
| advice (patient or other healthcare professional)                                  | <b>Q14a_4_15_1</b><br>Ticked = 1<br>Not ticked = 0 | <b>Q14a_2_15_1</b><br>Ticked = 1<br>Not ticked = 0 | <b>Q14a_3_15</b><br>1: under supervision<br>2: shared responsibility<br>3: full autonomy | <b>Q39_5_15</b><br>1: not allowed<br>2: under supervision<br>3: shared responsibility<br>4: full autonomy | <b>Q14a_5_15</b><br>1: not allowed<br>2: under supervision<br>3: shared responsibility<br>4: full autonomy | <b>Q14a_1_15</b><br>1: not allowed<br>2: under supervision<br>3: shared responsibility<br>4: full autonomy | <b>Q14a_6_15</b><br>1: not allowed<br>2: under supervision<br>3: shared responsibility<br>4: full autonomy | <b>Q14a_7_15</b><br>1: not allowed<br>2: under supervision<br>3: shared responsibility<br>4: full autonomy |
| determination of type/dosage                                                       | <b>Q14a_4_16_1</b><br>Ticked = 1<br>Not ticked = 0 | <b>Q14a_2_16_1</b><br>Ticked = 1<br>Not ticked = 0 | <b>Q14a_3_16</b><br>1: under supervision<br>2: shared responsibility<br>3: full autonomy | <b>Q39_5_16</b><br>1: not allowed<br>2: under supervision<br>3: shared responsibility<br>4: full autonomy | <b>Q14a_5_16</b><br>1: not allowed<br>2: under supervision<br>3: shared responsibility<br>4: full autonomy | <b>Q14a_1_16</b><br>1: not allowed<br>2: under supervision<br>3: shared responsibility<br>4: full autonomy | <b>Q14a_6_16</b><br>1: not allowed<br>2: under supervision<br>3: shared responsibility<br>4: full autonomy | <b>Q14a_7_16</b><br>1: not allowed<br>2: under supervision<br>3: shared responsibility<br>4: full autonomy |
| initiation of medication (reactive / proactive)                                    | <b>Q14a_4_17_1</b><br>Ticked = 1<br>Not ticked = 0 | <b>Q14a_2_17_1</b><br>Ticked = 1<br>Not ticked = 0 | <b>Q14a_3_17</b><br>1: under supervision<br>2: shared responsibility<br>3: full autonomy | <b>Q39_5_17</b><br>1: not allowed<br>2: under supervision<br>3: shared responsibility<br>4: full autonomy | <b>Q14a_5_17</b><br>1: not allowed<br>2: under supervision<br>3: shared responsibility<br>4: full autonomy | <b>Q14a_1_17</b><br>1: not allowed<br>2: under supervision<br>3: shared responsibility<br>4: full autonomy | <b>Q14a_6_17</b><br>1: not allowed<br>2: under supervision<br>3: shared responsibility<br>4: full autonomy | <b>Q14a_7_17</b><br>1: not allowed<br>2: under supervision<br>3: shared responsibility<br>4: full autonomy |

|                                                                                                                                                                                 |                                                                                        |                                                                                        |                                                                                          |                                                                                                           |                                                                                                            |                                                                                                            |                                                                                                            |                                                                                                            |
|---------------------------------------------------------------------------------------------------------------------------------------------------------------------------------|----------------------------------------------------------------------------------------|----------------------------------------------------------------------------------------|------------------------------------------------------------------------------------------|-----------------------------------------------------------------------------------------------------------|------------------------------------------------------------------------------------------------------------|------------------------------------------------------------------------------------------------------------|------------------------------------------------------------------------------------------------------------|------------------------------------------------------------------------------------------------------------|
| adaptation of dose,<br>dose titration                                                                                                                                           | <b>Q14a_4_18_1</b><br>Ticked = 1<br>Not ticked = 0                                     | <b>Q14a_2_18_1</b><br>Ticked = 1<br>Not ticked = 0                                     | <b>Q14a_3_18</b><br>1: under supervision<br>2: shared responsibility<br>3: full autonomy | <b>Q39_5_18</b><br>1: not allowed<br>2: under supervision<br>3: shared responsibility<br>4: full autonomy | <b>Q14a_5_18</b><br>1: not allowed<br>2: under supervision<br>3: shared responsibility<br>4: full autonomy | <b>Q14a_1_18</b><br>1: not allowed<br>2: under supervision<br>3: shared responsibility<br>4: full autonomy | <b>Q14a_6_18</b><br>1: not allowed<br>2: under supervision<br>3: shared responsibility<br>4: full autonomy | <b>Q14a_7_18</b><br>1: not allowed<br>2: under supervision<br>3: shared responsibility<br>4: full autonomy |
| decision on<br>continuation /cessation<br>of medication                                                                                                                         | <b>Q14a_4_19_1</b><br>Ticked = 1<br>Not ticked = 0                                     | <b>Q14a_2_19_1</b><br>Ticked = 1<br>Not ticked = 0                                     | <b>Q14a_3_19</b><br>1: under supervision<br>2: shared responsibility<br>3: full autonomy | <b>Q39_5_19</b><br>1: not allowed<br>2: under supervision<br>3: shared responsibility<br>4: full autonomy | <b>Q14a_5_19</b><br>1: not allowed<br>2: under supervision<br>3: shared responsibility<br>4: full autonomy | <b>Q14a_1_19</b><br>1: not allowed<br>2: under supervision<br>3: shared responsibility<br>4: full autonomy | <b>Q14a_6_19</b><br>1: not allowed<br>2: under supervision<br>3: shared responsibility<br>4: full autonomy | <b>Q14a_7_19</b><br>1: not allowed<br>2: under supervision<br>3: shared responsibility<br>4: full autonomy |
| PRN (pro re nata, 'if<br>needed' medication) /<br>standing prescription<br>renewal order                                                                                        | <b>Q14a_4_20_1</b><br>Ticked = 1<br>Not ticked = 0                                     | <b>Q14a_2_20_1</b><br>Ticked = 1<br>Not ticked = 0                                     | <b>Q14a_3_20</b><br>1: under supervision<br>2: shared responsibility<br>3: full autonomy | <b>Q39_5_20</b><br>1: not allowed<br>2: under supervision<br>3: shared responsibility<br>4: full autonomy | <b>Q14a_5_20</b><br>1: not allowed<br>2: under supervision<br>3: shared responsibility<br>4: full autonomy | <b>Q14a_1_20</b><br>1: not allowed<br>2: under supervision<br>3: shared responsibility<br>4: full autonomy | <b>Q14a_6_20</b><br>1: not allowed<br>2: under supervision<br>3: shared responsibility<br>4: full autonomy | <b>Q14a_7_20</b><br>1: not allowed<br>2: under supervision<br>3: shared responsibility<br>4: full autonomy |
| medication<br>reconciliation                                                                                                                                                    | <b>Q14a_4_21_1</b><br>Ticked = 1<br>Not ticked = 0                                     | <b>Q14a_2_21_1</b><br>Ticked = 1<br>Not ticked = 0                                     | <b>Q14a_3_21</b><br>1: under supervision<br>2: shared responsibility<br>3: full autonomy | <b>Q39_5_21</b><br>1: not allowed<br>2: under supervision<br>3: shared responsibility<br>4: full autonomy | <b>Q14a_5_21</b><br>1: not allowed<br>2: under supervision<br>3: shared responsibility<br>4: full autonomy | <b>Q14a_1_21</b><br>1: not allowed<br>2: under supervision<br>3: shared responsibility<br>4: full autonomy | <b>Q14a_6_21</b><br>1: not allowed<br>2: under supervision<br>3: shared responsibility<br>4: full autonomy | <b>Q14a_7_21</b><br>1: not allowed<br>2: under supervision<br>3: shared responsibility<br>4: full autonomy |
| medication review                                                                                                                                                               | <b>Q14a_4_22_1</b><br>Ticked = 1<br>Not ticked = 0                                     | <b>Q14a_2_22_1</b><br>Ticked = 1<br>Not ticked = 0                                     | <b>Q14a_3_22</b><br>1: under supervision<br>2: shared responsibility<br>3: full autonomy | <b>Q39_5_22</b><br>1: not allowed<br>2: under supervision<br>3: shared responsibility<br>4: full autonomy | <b>Q14a_5_22</b><br>1: not allowed<br>2: under supervision<br>3: shared responsibility<br>4: full autonomy | <b>Q14a_1_22</b><br>1: not allowed<br>2: under supervision<br>3: shared responsibility<br>4: full autonomy | <b>Q14a_6_22</b><br>1: not allowed<br>2: under supervision<br>3: shared responsibility<br>4: full autonomy | <b>Q14a_7_22</b><br>1: not allowed<br>2: under supervision<br>3: shared responsibility<br>4: full autonomy |
| intervention in case of<br>emergency                                                                                                                                            | <b>Q14a_4_23_1</b><br>Ticked = 1<br>Not ticked = 0                                     | <b>Q14a_2_23_1</b><br>Ticked = 1<br>Not ticked = 0                                     | <b>Q14a_3_23</b><br>1: under supervision<br>2: shared responsibility<br>3: full autonomy | <b>Q39_5_23</b><br>1: not allowed<br>2: under supervision<br>3: shared responsibility<br>4: full autonomy | <b>Q14a_5_23</b><br>1: not allowed<br>2: under supervision<br>3: shared responsibility<br>4: full autonomy | <b>Q14a_1_23</b><br>1: not allowed<br>2: under supervision<br>3: shared responsibility<br>4: full autonomy | <b>Q14a_6_23</b><br>1: not allowed<br>2: under supervision<br>3: shared responsibility<br>4: full autonomy | <b>Q14a_7_23</b><br>1: not allowed<br>2: under supervision<br>3: shared responsibility<br>4: full autonomy |
| transitional care<br>communication, inter /<br>intraprofessional<br>collaboration /<br>communication<br>including reporting,<br>advising, informing,<br>alerting and discussing | <b>Q14a_4_24_1</b><br>Ticked = 1<br>Not ticked = 0                                     | <b>Q14a_2_24_1</b><br>Ticked = 1<br>Not ticked = 0                                     | <b>Q14a_3_24</b><br>1: under supervision<br>2: shared responsibility<br>3: full autonomy | <b>Q39_5_24</b><br>1: not allowed<br>2: under supervision<br>3: shared responsibility<br>4: full autonomy | <b>Q14a_5_24</b><br>1: not allowed<br>2: under supervision<br>3: shared responsibility<br>4: full autonomy | <b>Q14a_1_24</b><br>1: not allowed<br>2: under supervision<br>3: shared responsibility<br>4: full autonomy | <b>Q14a_6_24</b><br>1: not allowed<br>2: under supervision<br>3: shared responsibility<br>4: full autonomy | <b>Q14a_7_24</b><br>1: not allowed<br>2: under supervision<br>3: shared responsibility<br>4: full autonomy |
| collegial mentoring                                                                                                                                                             | <b>Q14a_4_25_1</b><br>Ticked = 1<br>Not ticked = 0                                     | <b>Q14a_2_25_1</b><br>Ticked = 1<br>Not ticked = 0                                     | <b>Q14a_3_25</b><br>1: under supervision<br>2: shared responsibility<br>3: full autonomy | <b>Q39_5_25</b><br>1: not allowed<br>2: under supervision<br>3: shared responsibility<br>4: full autonomy | <b>Q14a_5_25</b><br>1: not allowed<br>2: under supervision<br>3: shared responsibility<br>4: full autonomy | <b>Q14a_1_25</b><br>1: not allowed<br>2: under supervision<br>3: shared responsibility<br>4: full autonomy | <b>Q14a_6_25</b><br>1: not allowed<br>2: under supervision<br>3: shared responsibility<br>4: full autonomy | <b>Q14a_7_25</b><br>1: not allowed<br>2: under supervision<br>3: shared responsibility<br>4: full autonomy |
| other task within<br>prescription<br>management:                                                                                                                                | <b>Q14a_4_26_1</b><br>Ticked = 1<br>Not ticked = 0<br><b>Q14a_4_26_T</b><br><b>EXT</b> | <b>Q14a_2_26_1</b><br>Ticked = 1<br>Not ticked = 0<br><b>Q14a_2_26_T</b><br><b>EXT</b> | <b>Q14a_3_26</b><br>1: under supervision<br>2: shared responsibility<br>3: full autonomy | <b>Q39_5_26</b><br>1: not allowed<br>2: under supervision<br>3: shared responsibility<br>4: full autonomy | <b>Q14a_5_26</b><br>1: not allowed<br>2: under supervision<br>3: shared responsibility<br>4: full autonomy | <b>Q14a_1_26</b><br>1: not allowed<br>2: under supervision<br>3: shared responsibility<br>4: full autonomy | <b>Q14a_6_26</b><br>1: not allowed<br>2: under supervision<br>3: shared responsibility<br>4: full autonomy | <b>Q14a_7_26</b><br>1: not allowed<br>2: under supervision<br>3: shared responsibility<br>4: full autonomy |

|  |  |  |                    |                  |                    |                    |                    |                    |
|--|--|--|--------------------|------------------|--------------------|--------------------|--------------------|--------------------|
|  |  |  | Q14a_3_26_<br>TEXT | Q39_5_26_<br>EXT | Q14a_5_26_<br>TEXT | Q14a_1_26_<br>TEXT | Q14a_6_26_<br>TEXT | Q14a_7_26_<br>TEXT |
|--|--|--|--------------------|------------------|--------------------|--------------------|--------------------|--------------------|

**Q15/ In order to obtain best quality of care and patient outcomes (= ideal situation, which can be different from the current situation), to what extent should nurses be allowed to prescribe medicines?**

- No nurse prescribing (*info: next question will not be shown*) **1**
- Dependent prescribing **2**
- Independent prescribing **3**

**Q16/ In an ideal interprofessional healthcare situation, which restrictions would be needed to optimise nurse prescribing? (tick all that apply)**

- **Q16\_1** no restrictions = **1**; restrictions = **0**
- **Q16\_2** only a restricted list of medicines =**1**; this restriction is not applicable =**0**
- **Q16\_3** only in a specific context, pathology / specialisation =**1**; this restriction is not applicable =**0**
- **Q16\_4** only after specific training =**1**; this restriction is not applicable =**0**
- **Q16\_6** only long-term chronic medicines =**1**; this restriction is not applicable =**0**
- **Q16\_7** only low risk medicines such as? =**1**; this restriction is not applicable =**0**
- **Q16\_8** prescription-only medicines only =**1**; this restriction is not applicable =**0**
- **Q16\_9** only in emergency=**1**; this restriction is not applicable =**0**
- **Q16\_10** only within an individual patient clinical management plan =**1**; this restriction is not applicable =**0**
- **Q16\_5** other: =**1**; no other restrictions applicable =**0** ... **Q16\_5\_TEXT**

**Q17a/ RESPONSIBILITY 6: medication safety management.**

|  |                                                                                                                   |                                                                                                                             |                                                                                                                       |                                                                                                                        |                                                                                                                        |                                                                                                                        |                                                                                                                        |                                                                                                                        |
|--|-------------------------------------------------------------------------------------------------------------------|-----------------------------------------------------------------------------------------------------------------------------|-----------------------------------------------------------------------------------------------------------------------|------------------------------------------------------------------------------------------------------------------------|------------------------------------------------------------------------------------------------------------------------|------------------------------------------------------------------------------------------------------------------------|------------------------------------------------------------------------------------------------------------------------|------------------------------------------------------------------------------------------------------------------------|
|  | <b>Task <u>not</u> relevant</b><br>within medication<br>safety<br>management.<br>(skip following<br>columns, when | <b>Task <u>not</u> allowed</b><br>for nurses within<br>medication safety<br>management.<br>(skip following<br>columns, when | Task allowed for<br><b>all levels</b> of<br>nurses within<br>medication<br>safety<br>management.<br>Specify the level | Specify the level<br>of responsibility<br>for <b>level 4</b><br>nurses<br>performing this<br>task within<br>medication | Specify the level<br>of responsibility<br>for <b>level 5</b><br>nurses<br>performing this<br>task within<br>medication | Specify the level<br>of responsibility<br>for <b>level 6</b><br>nurses<br>performing this<br>task within<br>medication | Specify the level<br>of responsibility<br>for <b>level 7</b><br>nurses<br>performing this<br>task within<br>medication | Specify the level<br>of responsibility<br>for <b>level 8</b><br>nurses<br>performing this<br>task within<br>medication |
|--|-------------------------------------------------------------------------------------------------------------------|-----------------------------------------------------------------------------------------------------------------------------|-----------------------------------------------------------------------------------------------------------------------|------------------------------------------------------------------------------------------------------------------------|------------------------------------------------------------------------------------------------------------------------|------------------------------------------------------------------------------------------------------------------------|------------------------------------------------------------------------------------------------------------------------|------------------------------------------------------------------------------------------------------------------------|

|                                                                                    |                                                   |                                                   |                                                                                         |                                                                                                          |                                                                                                           |                                                                                                           |                                                                                                           |                                                                                                           |
|------------------------------------------------------------------------------------|---------------------------------------------------|---------------------------------------------------|-----------------------------------------------------------------------------------------|----------------------------------------------------------------------------------------------------------|-----------------------------------------------------------------------------------------------------------|-----------------------------------------------------------------------------------------------------------|-----------------------------------------------------------------------------------------------------------|-----------------------------------------------------------------------------------------------------------|
|                                                                                    | this options is ticked)                           | this options is ticked)                           | of responsibility. (skip following columns, when this options is ticked)                | safety management<br>Variable only applicable in Germany and the Netherlands                             | safety management                                                                                         | safety management                                                                                         | safety management                                                                                         | safety management                                                                                         |
| observation, documentation, registration, report                                   | <b>Q17a_4_1_1</b><br>Ticked = 1<br>Not ticked = 0 | <b>Q17a_2_1_1</b><br>Ticked = 1<br>Not ticked = 0 | <b>Q17a_3_1</b><br>1: under supervision<br>2: shared responsibility<br>3: full autonomy | <b>Q38_5_1</b><br>1: not allowed<br>2: under supervision<br>3: shared responsibility<br>4: full autonomy | <b>Q17a_5_1</b><br>1: not allowed<br>2: under supervision<br>3: shared responsibility<br>4: full autonomy | <b>Q17a_1_1</b><br>1: not allowed<br>2: under supervision<br>3: shared responsibility<br>4: full autonomy | <b>Q17a_6_1</b><br>1: not allowed<br>2: under supervision<br>3: shared responsibility<br>4: full autonomy | <b>Q17a_7_1</b><br>1: not allowed<br>2: under supervision<br>3: shared responsibility<br>4: full autonomy |
| assessing patients competences                                                     | <b>Q17a_4_2_1</b><br>Ticked = 1<br>Not ticked = 0 | <b>Q17a_2_2_1</b><br>Ticked = 1<br>Not ticked = 0 | <b>Q17a_3_2</b><br>1: under supervision<br>2: shared responsibility<br>3: full autonomy | <b>Q38_5_2</b><br>1: not allowed<br>2: under supervision<br>3: shared responsibility<br>4: full autonomy | <b>Q17a_5_2</b><br>1: not allowed<br>2: under supervision<br>3: shared responsibility<br>4: full autonomy | <b>Q17a_1_2</b><br>1: not allowed<br>2: under supervision<br>3: shared responsibility<br>4: full autonomy | <b>Q17a_6_2</b><br>1: not allowed<br>2: under supervision<br>3: shared responsibility<br>4: full autonomy | <b>Q17a_7_2</b><br>1: not allowed<br>2: under supervision<br>3: shared responsibility<br>4: full autonomy |
| assessment and addressing patient/family needs                                     | <b>Q17a_4_3_1</b><br>Ticked = 1<br>Not ticked = 0 | <b>Q17a_2_3_1</b><br>Ticked = 1<br>Not ticked = 0 | <b>Q17a_3_3</b><br>1: under supervision<br>2: shared responsibility<br>3: full autonomy | <b>Q38_5_3</b><br>1: not allowed<br>2: under supervision<br>3: shared responsibility<br>4: full autonomy | <b>Q17a_5_3</b><br>1: not allowed<br>2: under supervision<br>3: shared responsibility<br>4: full autonomy | <b>Q17a_1_3</b><br>1: not allowed<br>2: under supervision<br>3: shared responsibility<br>4: full autonomy | <b>Q17a_6_3</b><br>1: not allowed<br>2: under supervision<br>3: shared responsibility<br>4: full autonomy | <b>Q17a_7_3</b><br>1: not allowed<br>2: under supervision<br>3: shared responsibility<br>4: full autonomy |
| recognising & preventing risks / complications / medication errors                 | <b>Q17a_4_4_1</b><br>Ticked = 1<br>Not ticked = 0 | <b>Q17a_2_4_1</b><br>Ticked = 1<br>Not ticked = 0 | <b>Q17a_3_4</b><br>1: under supervision<br>2: shared responsibility<br>3: full autonomy | <b>Q38_5_4</b><br>1: not allowed<br>2: under supervision<br>3: shared responsibility<br>4: full autonomy | <b>Q17a_5_4</b><br>1: not allowed<br>2: under supervision<br>3: shared responsibility<br>4: full autonomy | <b>Q17a_1_4</b><br>1: not allowed<br>2: under supervision<br>3: shared responsibility<br>4: full autonomy | <b>Q17a_6_4</b><br>1: not allowed<br>2: under supervision<br>3: shared responsibility<br>4: full autonomy | <b>Q17a_7_4</b><br>1: not allowed<br>2: under supervision<br>3: shared responsibility<br>4: full autonomy |
| identification, reporting and addressing contra-indications, drug related problems | <b>Q17a_4_5_1</b><br>Ticked = 1<br>Not ticked = 0 | <b>Q17a_2_5_1</b><br>Ticked = 1<br>Not ticked = 0 | <b>Q17a_3_5</b><br>1: under supervision<br>2: shared responsibility<br>3: full autonomy | <b>Q38_5_5</b><br>1: not allowed<br>2: under supervision<br>3: shared responsibility<br>4: full autonomy | <b>Q17a_5_5</b><br>1: not allowed<br>2: under supervision<br>3: shared responsibility<br>4: full autonomy | <b>Q17a_1_5</b><br>1: not allowed<br>2: under supervision<br>3: shared responsibility<br>4: full autonomy | <b>Q17a_6_5</b><br>1: not allowed<br>2: under supervision<br>3: shared responsibility<br>4: full autonomy | <b>Q17a_7_5</b><br>1: not allowed<br>2: under supervision<br>3: shared responsibility<br>4: full autonomy |
| follow-up                                                                          | <b>Q17a_4_6_1</b><br>Ticked = 1<br>Not ticked = 0 | <b>Q17a_2_6_1</b><br>Ticked = 1<br>Not ticked = 0 | <b>Q17a_3_6</b><br>1: under supervision<br>2: shared responsibility<br>3: full autonomy | <b>Q38_5_6</b><br>1: not allowed<br>2: under supervision<br>3: shared responsibility<br>4: full autonomy | <b>Q17a_5_6</b><br>1: not allowed<br>2: under supervision<br>3: shared responsibility<br>4: full autonomy | <b>Q17a_1_6</b><br>1: not allowed<br>2: under supervision<br>3: shared responsibility<br>4: full autonomy | <b>Q17a_6_6</b><br>1: not allowed<br>2: under supervision<br>3: shared responsibility<br>4: full autonomy | <b>Q17a_7_6</b><br>1: not allowed<br>2: under supervision<br>3: shared responsibility<br>4: full autonomy |
| evidence based practice                                                            | <b>Q17a_4_7_1</b><br>Ticked = 1<br>Not ticked = 0 | <b>Q17a_2_7_1</b><br>Ticked = 1<br>Not ticked = 0 | <b>Q17a_3_7</b><br>1: under supervision<br>2: shared responsibility<br>3: full autonomy | <b>Q38_5_7</b><br>1: not allowed<br>2: under supervision<br>3: shared responsibility<br>4: full autonomy | <b>Q17a_5_7</b><br>1: not allowed<br>2: under supervision<br>3: shared responsibility<br>4: full autonomy | <b>Q17a_1_7</b><br>1: not allowed<br>2: under supervision<br>3: shared responsibility<br>4: full autonomy | <b>Q17a_6_7</b><br>1: not allowed<br>2: under supervision<br>3: shared responsibility<br>4: full autonomy | <b>Q17a_7_7</b><br>1: not allowed<br>2: under supervision<br>3: shared responsibility<br>4: full autonomy |
| decision making                                                                    | <b>Q17a_4_8_1</b><br>Ticked = 1<br>Not ticked = 0 | <b>Q17a_2_8_1</b><br>Ticked = 1<br>Not ticked = 0 | <b>Q17a_3_8</b><br>1: under supervision<br>2: shared responsibility<br>3: full autonomy | <b>Q38_5_8</b><br>1: not allowed<br>2: under supervision<br>3: shared responsibility<br>4: full autonomy | <b>Q17a_5_8</b><br>1: not allowed<br>2: under supervision<br>3: shared responsibility<br>4: full autonomy | <b>Q17a_1_8</b><br>1: not allowed<br>2: under supervision<br>3: shared responsibility<br>4: full autonomy | <b>Q17a_6_8</b><br>1: not allowed<br>2: under supervision<br>3: shared responsibility<br>4: full autonomy | <b>Q17a_7_8</b><br>1: not allowed<br>2: under supervision<br>3: shared responsibility<br>4: full autonomy |
| communication /discussion with patient/family                                      | <b>Q17a_4_9_1</b><br>Ticked = 1<br>Not ticked = 0 | <b>Q17a_2_9_1</b><br>Ticked = 1<br>Not ticked = 0 | <b>Q17a_3_9</b><br>1: under supervision<br>2: shared responsibility<br>3: full autonomy | <b>Q38_5_9</b><br>1: not allowed<br>2: under supervision<br>3: shared responsibility                     | <b>Q17a_5_9</b><br>1: not allowed<br>2: under supervision<br>3: shared responsibility                     | <b>Q17a_1_9</b><br>1: not allowed<br>2: under supervision<br>3: shared responsibility                     | <b>Q17a_6_9</b><br>1: not allowed<br>2: under supervision<br>3: shared responsibility                     | <b>Q17a_7_9</b><br>1: not allowed<br>2: under supervision<br>3: shared responsibility                     |

|                                                                                                                                                            |                                                                                        |                                                                                        |                                                                                                                              |                                                                                                                                              |                                                                                                                                                |                                                                                                                                                |                                                                                                                                                |                                                                                                                                                |
|------------------------------------------------------------------------------------------------------------------------------------------------------------|----------------------------------------------------------------------------------------|----------------------------------------------------------------------------------------|------------------------------------------------------------------------------------------------------------------------------|----------------------------------------------------------------------------------------------------------------------------------------------|------------------------------------------------------------------------------------------------------------------------------------------------|------------------------------------------------------------------------------------------------------------------------------------------------|------------------------------------------------------------------------------------------------------------------------------------------------|------------------------------------------------------------------------------------------------------------------------------------------------|
|                                                                                                                                                            |                                                                                        |                                                                                        |                                                                                                                              | 4: full autonomy                                                                                                                             | 4: full autonomy                                                                                                                               | 4: full autonomy                                                                                                                               | 4: full autonomy                                                                                                                               | 4: full autonomy                                                                                                                               |
| Inter / intraprofessional referrals                                                                                                                        | <b>Q17a_4_10_1</b><br>Ticked = 1<br>Not ticked = 0                                     | <b>Q17a_2_10_1</b><br>Ticked = 1<br>Not ticked = 0                                     | <b>Q17a_3_10</b><br>1: under supervision<br>2: shared responsibility<br>3: full autonomy                                     | <b>Q38_5_10</b><br>1: not allowed<br>2: under supervision<br>3: shared responsibility<br>4: full autonomy                                    | <b>Q17a_5_10</b><br>1: not allowed<br>2: under supervision<br>3: shared responsibility<br>4: full autonomy                                     | <b>Q17a_1_10</b><br>1: not allowed<br>2: under supervision<br>3: shared responsibility<br>4: full autonomy                                     | <b>Q17a_6_10</b><br>1: not allowed<br>2: under supervision<br>3: shared responsibility<br>4: full autonomy                                     | <b>Q17a_7_10</b><br>1: not allowed<br>2: under supervision<br>3: shared responsibility<br>4: full autonomy                                     |
| facilitation of medication management                                                                                                                      | <b>Q17a_4_12_1</b><br>Ticked = 1<br>Not ticked = 0                                     | <b>Q17a_2_12_1</b><br>Ticked = 1<br>Not ticked = 0                                     | <b>Q17a_3_12</b><br>1: under supervision<br>2: shared responsibility<br>3: full autonomy                                     | <b>Q38_5_12</b><br>1: not allowed<br>2: under supervision<br>3: shared responsibility<br>4: full autonomy                                    | <b>Q17a_5_12</b><br>1: not allowed<br>2: under supervision<br>3: shared responsibility<br>4: full autonomy                                     | <b>Q17a_1_12</b><br>1: not allowed<br>2: under supervision<br>3: shared responsibility<br>4: full autonomy                                     | <b>Q17a_6_12</b><br>1: not allowed<br>2: under supervision<br>3: shared responsibility<br>4: full autonomy                                     | <b>Q17a_7_12</b><br>1: not allowed<br>2: under supervision<br>3: shared responsibility<br>4: full autonomy                                     |
| selfcare support and therapeutic education                                                                                                                 | <b>Q17a_4_15_1</b><br>Ticked = 1<br>Not ticked = 0                                     | <b>Q17a_2_15_1</b><br>Ticked = 1<br>Not ticked = 0                                     | <b>Q17a_3_15</b><br>1: under supervision<br>2: shared responsibility<br>3: full autonomy                                     | <b>Q38_5_15</b><br>1: not allowed<br>2: under supervision<br>3: shared responsibility<br>4: full autonomy                                    | <b>Q17a_5_15</b><br>1: not allowed<br>2: under supervision<br>3: shared responsibility<br>4: full autonomy                                     | <b>Q17a_1_15</b><br>1: not allowed<br>2: under supervision<br>3: shared responsibility<br>4: full autonomy                                     | <b>Q17a_6_15</b><br>1: not allowed<br>2: under supervision<br>3: shared responsibility<br>4: full autonomy                                     | <b>Q17a_7_15</b><br>1: not allowed<br>2: under supervision<br>3: shared responsibility<br>4: full autonomy                                     |
| advice (patient or other healthcare professional)                                                                                                          | <b>Q17a_4_16_1</b><br>Ticked = 1<br>Not ticked = 0                                     | <b>Q17a_2_16_1</b><br>Ticked = 1<br>Not ticked = 0                                     | <b>Q17a_3_16</b><br>1: under supervision<br>2: shared responsibility<br>3: full autonomy                                     | <b>Q38_5_16</b><br>1: not allowed<br>2: under supervision<br>3: shared responsibility<br>4: full autonomy                                    | <b>Q17a_5_16</b><br>1: not allowed<br>2: under supervision<br>3: shared responsibility<br>4: full autonomy                                     | <b>Q17a_1_16</b><br>1: not allowed<br>2: under supervision<br>3: shared responsibility<br>4: full autonomy                                     | <b>Q17a_6_16</b><br>1: not allowed<br>2: under supervision<br>3: shared responsibility<br>4: full autonomy                                     | <b>Q17a_7_16</b><br>1: not allowed<br>2: under supervision<br>3: shared responsibility<br>4: full autonomy                                     |
| intervention in case of emergency                                                                                                                          | <b>Q17a_4_17_1</b><br>Ticked = 1<br>Not ticked = 0                                     | <b>Q17a_2_17_1</b><br>Ticked = 1<br>Not ticked = 0                                     | <b>Q17a_3_17</b><br>1: under supervision<br>2: shared responsibility<br>3: full autonomy                                     | <b>Q38_5_17</b><br>1: not allowed<br>2: under supervision<br>3: shared responsibility<br>4: full autonomy                                    | <b>Q17a_5_17</b><br>1: not allowed<br>2: under supervision<br>3: shared responsibility<br>4: full autonomy                                     | <b>Q17a_1_17</b><br>1: not allowed<br>2: under supervision<br>3: shared responsibility<br>4: full autonomy                                     | <b>Q17a_6_17</b><br>1: not allowed<br>2: under supervision<br>3: shared responsibility<br>4: full autonomy                                     | <b>Q1a_7_17</b><br>1: not allowed<br>2: under supervision<br>3: shared responsibility<br>4: full autonomy                                      |
| transitional care communication, inter / intraprofessional collaboration / communication including reporting, advising, informing, alerting and discussing | <b>Q17a_4_18_1</b><br>Ticked = 1<br>Not ticked = 0                                     | <b>Q17a_2_18_1</b><br>Ticked = 1<br>Not ticked = 0                                     | <b>Q17a_3_18</b><br>1: under supervision<br>2: shared responsibility<br>3: full autonomy                                     | <b>Q38_5_18</b><br>1: not allowed<br>2: under supervision<br>3: shared responsibility<br>4: full autonomy                                    | <b>Q17a_5_18</b><br>1: not allowed<br>2: under supervision<br>3: shared responsibility<br>4: full autonomy                                     | <b>Q17a_1_18</b><br>1: not allowed<br>2: under supervision<br>3: shared responsibility<br>4: full autonomy                                     | <b>Q17a_6_18</b><br>1: not allowed<br>2: under supervision<br>3: shared responsibility<br>4: full autonomy                                     | <b>Q17a_7_18</b><br>1: not allowed<br>2: under supervision<br>3: shared responsibility<br>4: full autonomy                                     |
| collegial mentoring                                                                                                                                        | <b>Q17a_4_19_1</b><br>Ticked = 1<br>Not ticked = 0                                     | <b>Q17a_2_19_1</b><br>Ticked = 1<br>Not ticked = 0                                     | <b>Q17a_3_19</b><br>1: under supervision<br>2: shared responsibility<br>3: full autonomy                                     | <b>Q38_5_19</b><br>1: not allowed<br>2: under supervision<br>3: shared responsibility<br>4: full autonomy                                    | <b>Q17a_5_19</b><br>1: not allowed<br>2: under supervision<br>3: shared responsibility<br>4: full autonomy                                     | <b>Q17a_1_19</b><br>1: not allowed<br>2: under supervision<br>3: shared responsibility<br>4: full autonomy                                     | <b>Q17a_6_19</b><br>1: not allowed<br>2: under supervision<br>3: shared responsibility<br>4: full autonomy                                     | <b>Q17a_7_19</b><br>1: not allowed<br>2: under supervision<br>3: shared responsibility<br>4: full autonomy                                     |
| other task within medication safety management:                                                                                                            | <b>Q17a_4_20_1</b><br>Ticked = 1<br>Not ticked = 0<br><b>Q17a_4_20_T</b><br><b>EXT</b> | <b>Q17a_2_20_1</b><br>Ticked = 1<br>Not ticked = 0<br><b>Q17a_2_20_T</b><br><b>EXT</b> | <b>Q17a_3_20</b><br>1: under supervision<br>2: shared responsibility<br>3: full autonomy<br><b>Q17a_3_20_</b><br><b>TEXT</b> | <b>Q38_5_20</b><br>1: not allowed<br>2: under supervision<br>3: shared responsibility<br>4: full autonomy<br><b>Q38_5_20_T</b><br><b>EXT</b> | <b>Q17a_5_20</b><br>1: not allowed<br>2: under supervision<br>3: shared responsibility<br>4: full autonomy<br><b>Q17a_5_20_</b><br><b>TEXT</b> | <b>Q17a_1_20</b><br>1: not allowed<br>2: under supervision<br>3: shared responsibility<br>4: full autonomy<br><b>Q17a_1_20_</b><br><b>TEXT</b> | <b>Q17a_6_20</b><br>1: not allowed<br>2: under supervision<br>3: shared responsibility<br>4: full autonomy<br><b>Q17a_6_20_</b><br><b>TEXT</b> | <b>Q17a_7_20</b><br>1: not allowed<br>2: under supervision<br>3: shared responsibility<br>4: full autonomy<br><b>Q17a_7_20_</b><br><b>TEXT</b> |

**Q18a/ RESPONSIBILITY 7: (transition of) care co-ordination.**



|                                                                                              | <b>Task <u>not</u> relevant</b><br>within (transition<br>of) care<br>coordination.<br>(skip following<br>columns, when<br>this options is<br>ticked) | <b>Task <u>not</u> allowed</b><br>for nurses within<br>(transition of)<br>care coordination.<br>(skip following<br>columns, when<br>this options is<br>ticked) | Task allowed for<br><b>all levels</b> of<br>nurses within<br>(transition of)<br>care<br>coordination.<br>Specify the level<br>of<br>responsibility.<br>(skip following<br>columns, when<br>this options is<br>ticked) | Specify the level<br>of responsibility<br>for <b>level 4</b><br>nurses<br>performing this<br>task within<br>(transition of)<br>care<br>coordination<br><b>Variable only<br/>applicable in<br/>Germany and<br/>the Netherlands</b> | Specify the level<br>of responsibility<br>for <b>level 5</b><br>nurses<br>performing this<br>task within<br>(transition of)<br>care<br>coordination | Specify the level<br>of responsibility<br>for <b>level 6</b><br>nurses<br>performing this<br>task within<br>(transition of)<br>care<br>coordination | Specify the level<br>of responsibility<br>for <b>level 7</b><br>nurses<br>performing this<br>task within<br>(transition of)<br>care<br>coordination | Specify the level<br>of responsibility<br>for <b>level 8</b><br>nurses<br>performing this<br>task within<br>(transition of)<br>care<br>coordination |
|----------------------------------------------------------------------------------------------|------------------------------------------------------------------------------------------------------------------------------------------------------|----------------------------------------------------------------------------------------------------------------------------------------------------------------|-----------------------------------------------------------------------------------------------------------------------------------------------------------------------------------------------------------------------|-----------------------------------------------------------------------------------------------------------------------------------------------------------------------------------------------------------------------------------|-----------------------------------------------------------------------------------------------------------------------------------------------------|-----------------------------------------------------------------------------------------------------------------------------------------------------|-----------------------------------------------------------------------------------------------------------------------------------------------------|-----------------------------------------------------------------------------------------------------------------------------------------------------|
| observation,<br>documentation,<br>registration, report                                       | <b>Q18a_4_1_1</b><br>Ticked = 1<br>Not ticked = 0                                                                                                    | <b>Q18a_2_1_1</b><br>Ticked = 1<br>Not ticked = 0                                                                                                              | <b>Q18a_3_1</b><br>1: under supervision<br>2: shared responsibility<br>3: full autonomy                                                                                                                               | <b>Q37_5_1</b><br>1: not allowed<br>2: under supervision<br>3: shared responsibility<br>4: full autonomy                                                                                                                          | <b>Q18a_5_1</b><br>1: not allowed<br>2: under supervision<br>3: shared responsibility<br>4: full autonomy                                           | <b>Q18a_1_1</b><br>1: not allowed<br>2: under supervision<br>3: shared responsibility<br>4: full autonomy                                           | <b>Q12a_6_1</b><br>1: not allowed<br>2: under supervision<br>3: shared responsibility<br>4: full autonomy                                           | <b>Q12a_7_1</b><br>1: not allowed<br>2: under supervision<br>3: shared responsibility<br>4: full autonomy                                           |
| assessing patients<br>competences                                                            | <b>Q18a_4_2_1</b><br>Ticked = 1<br>Not ticked = 0                                                                                                    | <b>Q18a_2_2_1</b><br>Ticked = 1<br>Not ticked = 0                                                                                                              | <b>Q18a_3_2</b><br>1: under supervision<br>2: shared responsibility<br>3: full autonomy                                                                                                                               | <b>Q37_5_2</b><br>1: not allowed<br>2: under supervision<br>3: shared responsibility<br>4: full autonomy                                                                                                                          | <b>Q18a_5_2</b><br>1: not allowed<br>2: under supervision<br>3: shared responsibility<br>4: full autonomy                                           | <b>Q18a_1_2</b><br>1: not allowed<br>2: under supervision<br>3: shared responsibility<br>4: full autonomy                                           | <b>Q12a_6_2</b><br>1: not allowed<br>2: under supervision<br>3: shared responsibility<br>4: full autonomy                                           | <b>Q12a_7_2</b><br>1: not allowed<br>2: under supervision<br>3: shared responsibility<br>4: full autonomy                                           |
| assessment and<br>addressing<br>patient/family needs                                         | <b>Q18a_4_3_1</b><br>Ticked = 1<br>Not ticked = 0                                                                                                    | <b>Q18a_2_3_1</b><br>Ticked = 1<br>Not ticked = 0                                                                                                              | <b>Q18a_3_3</b><br>1: under supervision<br>2: shared responsibility<br>3: full autonomy                                                                                                                               | <b>Q37_5_3</b><br>1: not allowed<br>2: under supervision<br>3: shared responsibility<br>4: full autonomy                                                                                                                          | <b>Q18a_5_3</b><br>1: not allowed<br>2: under supervision<br>3: shared responsibility<br>4: full autonomy                                           | <b>Q18a_1_3</b><br>1: not allowed<br>2: under supervision<br>3: shared responsibility<br>4: full autonomy                                           | <b>Q12a_6_3</b><br>1: not allowed<br>2: under supervision<br>3: shared responsibility<br>4: full autonomy                                           | <b>Q12a_7_3</b><br>1: not allowed<br>2: under supervision<br>3: shared responsibility<br>4: full autonomy                                           |
| recognising &<br>preventing risks /<br>complications /<br>medication errors                  | <b>Q18a_4_4_1</b><br>Ticked = 1<br>Not ticked = 0                                                                                                    | <b>Q18a_2_4_1</b><br>Ticked = 1<br>Not ticked = 0                                                                                                              | <b>Q18a_3_4</b><br>1: under supervision<br>2: shared responsibility<br>3: full autonomy                                                                                                                               | <b>Q37_5_4</b><br>1: not allowed<br>2: under supervision<br>3: shared responsibility<br>4: full autonomy                                                                                                                          | <b>Q18a_5_4</b><br>1: not allowed<br>2: under supervision<br>3: shared responsibility<br>4: full autonomy                                           | <b>Q18a_1_4</b><br>1: not allowed<br>2: under supervision<br>3: shared responsibility<br>4: full autonomy                                           | <b>Q12a_6_4</b><br>1: not allowed<br>2: under supervision<br>3: shared responsibility<br>4: full autonomy                                           | <b>Q12a_7_4</b><br>1: not allowed<br>2: under supervision<br>3: shared responsibility<br>4: full autonomy                                           |
| identification, reporting<br>and addressing contra-<br>indications, drug<br>related problems | <b>Q18a_4_5_1</b><br>Ticked = 1<br>Not ticked = 0                                                                                                    | <b>Q18a_2_5_1</b><br>Ticked = 1<br>Not ticked = 0                                                                                                              | <b>Q18a_3_5</b><br>1: under supervision<br>2: shared responsibility<br>3: full autonomy                                                                                                                               | <b>Q37_5_5</b><br>1: not allowed<br>2: under supervision<br>3: shared responsibility<br>4: full autonomy                                                                                                                          | <b>Q18a_5_5</b><br>1: not allowed<br>2: under supervision<br>3: shared responsibility<br>4: full autonomy                                           | <b>Q18a_1_5</b><br>1: not allowed<br>2: under supervision<br>3: shared responsibility<br>4: full autonomy                                           | <b>Q12a_6_5</b><br>1: not allowed<br>2: under supervision<br>3: shared responsibility<br>4: full autonomy                                           | <b>Q12a_7_5</b><br>1: not allowed<br>2: under supervision<br>3: shared responsibility<br>4: full autonomy                                           |
| follow-up                                                                                    | <b>Q18a_4_6_1</b><br>Ticked = 1<br>Not ticked = 0                                                                                                    | <b>Q18a_2_6_1</b><br>Ticked = 1<br>Not ticked = 0                                                                                                              | <b>Q18a_3_6</b><br>1: under supervision<br>2: shared responsibility<br>3: full autonomy                                                                                                                               | <b>Q37_5_6</b><br>1: not allowed<br>2: under supervision<br>3: shared responsibility<br>4: full autonomy                                                                                                                          | <b>Q18a_5_6</b><br>1: not allowed<br>2: under supervision<br>3: shared responsibility<br>4: full autonomy                                           | <b>Q18a_1_6</b><br>1: not allowed<br>2: under supervision<br>3: shared responsibility<br>4: full autonomy                                           | <b>Q12a_6_6</b><br>1: not allowed<br>2: under supervision<br>3: shared responsibility<br>4: full autonomy                                           | <b>Q12a_7_6</b><br>1: not allowed<br>2: under supervision<br>3: shared responsibility<br>4: full autonomy                                           |
| evidence based practice                                                                      | <b>Q18a_4_7_1</b><br>Ticked = 1<br>Not ticked = 0                                                                                                    | <b>Q18a_2_7_1</b><br>Ticked = 1<br>Not ticked = 0                                                                                                              | <b>Q18a_3_7</b><br>1: under supervision<br>2: shared responsibility<br>3: full autonomy                                                                                                                               | <b>Q37_5_7</b><br>1: not allowed<br>2: under supervision<br>3: shared responsibility<br>4: full autonomy                                                                                                                          | <b>Q18a_5_7</b><br>1: not allowed<br>2: under supervision<br>3: shared responsibility<br>4: full autonomy                                           | <b>Q18a_1_7</b><br>1: not allowed<br>2: under supervision<br>3: shared responsibility<br>4: full autonomy                                           | <b>Q12a_6_7</b><br>1: not allowed<br>2: under supervision<br>3: shared responsibility<br>4: full autonomy                                           | <b>Q12a_7_7</b><br>1: not allowed<br>2: under supervision<br>3: shared responsibility<br>4: full autonomy                                           |

|                                                                                                                                                            |                                                    |                                                    |                                                                                          |                                                                                                           |                                                                                                            |                                                                                                            |                                                                                                            |                                                                                                            |
|------------------------------------------------------------------------------------------------------------------------------------------------------------|----------------------------------------------------|----------------------------------------------------|------------------------------------------------------------------------------------------|-----------------------------------------------------------------------------------------------------------|------------------------------------------------------------------------------------------------------------|------------------------------------------------------------------------------------------------------------|------------------------------------------------------------------------------------------------------------|------------------------------------------------------------------------------------------------------------|
| decision making                                                                                                                                            | <b>Q18a_4_8_1</b><br>Ticked = 1<br>Not ticked = 0  | <b>Q18a_2_8_1</b><br>Ticked = 1<br>Not ticked = 0  | <b>Q18a_3_8</b><br>1: under supervision<br>2: shared responsibility<br>3: full autonomy  | <b>Q37_5_8</b><br>1: not allowed<br>2: under supervision<br>3: shared responsibility<br>4: full autonomy  | <b>Q18a_5_8</b><br>1: not allowed<br>2: under supervision<br>3: shared responsibility<br>4: full autonomy  | <b>Q18a_1_8</b><br>1: not allowed<br>2: under supervision<br>3: shared responsibility<br>4: full autonomy  | <b>Q12a_6_8</b><br>1: not allowed<br>2: under supervision<br>3: shared responsibility<br>4: full autonomy  | <b>Q12a_7_8</b><br>1: not allowed<br>2: under supervision<br>3: shared responsibility<br>4: full autonomy  |
| communication /discussion with patient/family                                                                                                              | <b>Q18a_4_9_1</b><br>Ticked = 1<br>Not ticked = 0  | <b>Q18a_2_9_1</b><br>Ticked = 1<br>Not ticked = 0  | <b>Q18a_3_9</b><br>1: under supervision<br>2: shared responsibility<br>3: full autonomy  | <b>Q37_5_9</b><br>1: not allowed<br>2: under supervision<br>3: shared responsibility<br>4: full autonomy  | <b>Q18a_5_9</b><br>1: not allowed<br>2: under supervision<br>3: shared responsibility<br>4: full autonomy  | <b>Q18a_1_9</b><br>1: not allowed<br>2: under supervision<br>3: shared responsibility<br>4: full autonomy  | <b>Q12a_6_9</b><br>1: not allowed<br>2: under supervision<br>3: shared responsibility<br>4: full autonomy  | <b>Q12a_7_9</b><br>1: not allowed<br>2: under supervision<br>3: shared responsibility<br>4: full autonomy  |
| Inter / intraprofessional referrals                                                                                                                        | <b>Q18a_4_10_1</b><br>Ticked = 1<br>Not ticked = 0 | <b>Q18a_2_10_1</b><br>Ticked = 1<br>Not ticked = 0 | <b>Q18a_3_10</b><br>1: under supervision<br>2: shared responsibility<br>3: full autonomy | <b>Q37_5_10</b><br>1: not allowed<br>2: under supervision<br>3: shared responsibility<br>4: full autonomy | <b>Q18a_5_10</b><br>1: not allowed<br>2: under supervision<br>3: shared responsibility<br>4: full autonomy | <b>Q18a_1_10</b><br>1: not allowed<br>2: under supervision<br>3: shared responsibility<br>4: full autonomy | <b>Q12a_6_10</b><br>1: not allowed<br>2: under supervision<br>3: shared responsibility<br>4: full autonomy | <b>Q12a_7_10</b><br>1: not allowed<br>2: under supervision<br>3: shared responsibility<br>4: full autonomy |
| facilitation of medication management                                                                                                                      | <b>Q18a_4_12_1</b><br>Ticked = 1<br>Not ticked = 0 | <b>Q18a_2_12_1</b><br>Ticked = 1<br>Not ticked = 0 | <b>Q18a_3_12</b><br>1: under supervision<br>2: shared responsibility<br>3: full autonomy | <b>Q37_5_12</b><br>1: not allowed<br>2: under supervision<br>3: shared responsibility<br>4: full autonomy | <b>Q18a_5_12</b><br>1: not allowed<br>2: under supervision<br>3: shared responsibility<br>4: full autonomy | <b>Q18a_1_12</b><br>1: not allowed<br>2: under supervision<br>3: shared responsibility<br>4: full autonomy | <b>Q12a_6_12</b><br>1: not allowed<br>2: under supervision<br>3: shared responsibility<br>4: full autonomy | <b>Q12a_7_12</b><br>1: not allowed<br>2: under supervision<br>3: shared responsibility<br>4: full autonomy |
| selfcare support and therapeutic education                                                                                                                 | <b>Q18a_4_15_1</b><br>Ticked = 1<br>Not ticked = 0 | <b>Q18a_2_15_1</b><br>Ticked = 1<br>Not ticked = 0 | <b>Q18a_3_15</b><br>1: under supervision<br>2: shared responsibility<br>3: full autonomy | <b>Q37_5_15</b><br>1: not allowed<br>2: under supervision<br>3: shared responsibility<br>4: full autonomy | <b>Q18a_5_15</b><br>1: not allowed<br>2: under supervision<br>3: shared responsibility<br>4: full autonomy | <b>Q18a_1_15</b><br>1: not allowed<br>2: under supervision<br>3: shared responsibility<br>4: full autonomy | <b>Q12a_6_15</b><br>1: not allowed<br>2: under supervision<br>3: shared responsibility<br>4: full autonomy | <b>Q12a_7_15</b><br>1: not allowed<br>2: under supervision<br>3: shared responsibility<br>4: full autonomy |
| advice (patient or other healthcare professional)                                                                                                          | <b>Q18a_4_16_1</b><br>Ticked = 1<br>Not ticked = 0 | <b>Q18a_2_16_1</b><br>Ticked = 1<br>Not ticked = 0 | <b>Q18a_3_16</b><br>1: under supervision<br>2: shared responsibility<br>3: full autonomy | <b>Q37_5_16</b><br>1: not allowed<br>2: under supervision<br>3: shared responsibility<br>4: full autonomy | <b>Q18a_5_16</b><br>1: not allowed<br>2: under supervision<br>3: shared responsibility<br>4: full autonomy | <b>Q18a_1_16</b><br>1: not allowed<br>2: under supervision<br>3: shared responsibility<br>4: full autonomy | <b>Q12a_6_16</b><br>1: not allowed<br>2: under supervision<br>3: shared responsibility<br>4: full autonomy | <b>Q12a_7_16</b><br>1: not allowed<br>2: under supervision<br>3: shared responsibility<br>4: full autonomy |
| discharge planning, transition of care planning                                                                                                            | <b>Q18a_4_17_1</b><br>Ticked = 1<br>Not ticked = 0 | <b>Q18a_2_17_1</b><br>Ticked = 1<br>Not ticked = 0 | <b>Q18a_3_17</b><br>1: under supervision<br>2: shared responsibility<br>3: full autonomy | <b>Q37_5_17</b><br>1: not allowed<br>2: under supervision<br>3: shared responsibility<br>4: full autonomy | <b>Q18a_5_17</b><br>1: not allowed<br>2: under supervision<br>3: shared responsibility<br>4: full autonomy | <b>Q18a_1_17</b><br>1: not allowed<br>2: under supervision<br>3: shared responsibility<br>4: full autonomy | <b>Q12a_6_17</b><br>1: not allowed<br>2: under supervision<br>3: shared responsibility<br>4: full autonomy | <b>Q12a_7_17</b><br>1: not allowed<br>2: under supervision<br>3: shared responsibility<br>4: full autonomy |
| transitional care communication, inter / intraprofessional collaboration / communication including reporting, advising, informing, alerting and discussing | <b>Q18a_4_18_1</b><br>Ticked = 1<br>Not ticked = 0 | <b>Q18a_2_18_1</b><br>Ticked = 1<br>Not ticked = 0 | <b>Q18a_3_18</b><br>1: under supervision<br>2: shared responsibility<br>3: full autonomy | <b>Q37_5_18</b><br>1: not allowed<br>2: under supervision<br>3: shared responsibility<br>4: full autonomy | <b>Q18a_5_18</b><br>1: not allowed<br>2: under supervision<br>3: shared responsibility<br>4: full autonomy | <b>Q18a_1_18</b><br>1: not allowed<br>2: under supervision<br>3: shared responsibility<br>4: full autonomy | <b>Q18a_6_18</b><br>1: not allowed<br>2: under supervision<br>3: shared responsibility<br>4: full autonomy | <b>Q18a_7_18</b><br>1: not allowed<br>2: under supervision<br>3: shared responsibility<br>4: full autonomy |
| collegial mentoring                                                                                                                                        | <b>Q18a_4_19_1</b><br>Ticked = 1<br>Not ticked = 0 | <b>Q18a_2_19_1</b><br>Ticked = 1<br>Not ticked = 0 | <b>Q18a_3_19</b><br>1: under supervision<br>2: shared responsibility<br>3: full autonomy | <b>Q37_5_19</b><br>1: not allowed<br>2: under supervision<br>3: shared responsibility<br>4: full autonomy | <b>Q18a_5_19</b><br>1: not allowed<br>2: under supervision<br>3: shared responsibility<br>4: full autonomy | <b>Q18a_1_19</b><br>1: not allowed<br>2: under supervision<br>3: shared responsibility<br>4: full autonomy | <b>Q18a_6_19</b><br>1: not allowed<br>2: under supervision<br>3: shared responsibility<br>4: full autonomy | <b>Q18a_7_19</b><br>1: not allowed<br>2: under supervision<br>3: shared responsibility<br>4: full autonomy |

|                                                            |                                                                                        |                                                                                        |                                                                                                                              |                                                                                                                                              |                                                                                                                                                |                                                                                                                                               |                                                                                                                                                |                                                                                                                                                |
|------------------------------------------------------------|----------------------------------------------------------------------------------------|----------------------------------------------------------------------------------------|------------------------------------------------------------------------------------------------------------------------------|----------------------------------------------------------------------------------------------------------------------------------------------|------------------------------------------------------------------------------------------------------------------------------------------------|-----------------------------------------------------------------------------------------------------------------------------------------------|------------------------------------------------------------------------------------------------------------------------------------------------|------------------------------------------------------------------------------------------------------------------------------------------------|
| other task within<br>(transition of) care<br>coordination: | <b>Q18a_4_20_1</b><br>Ticked = 1<br>Not ticked = 0<br><b>Q18a_4_20_T</b><br><b>EXT</b> | <b>Q18a_2_20_1</b><br>Ticked = 1<br>Not ticked = 0<br><b>Q18a_2_20_T</b><br><b>EXT</b> | <b>Q18a_3_20</b><br>1: under supervision<br>2: shared responsibility<br>3: full autonomy<br><b>Q18a_3_20_</b><br><b>TEXT</b> | <b>Q37_5_20</b><br>1: not allowed<br>2: under supervision<br>3: shared responsibility<br>4: full autonomy<br><b>Q37_5_20_T</b><br><b>EXT</b> | <b>Q18a_5_20</b><br>1: not allowed<br>2: under supervision<br>3: shared responsibility<br>4: full autonomy<br><b>Q18a_5_20_</b><br><b>TEXT</b> | <b>Q1a_1_20</b><br>1: not allowed<br>2: under supervision<br>3: shared responsibility<br>4: full autonomy<br><b>Q18a_1_20_</b><br><b>TEXT</b> | <b>Q18a_6_20</b><br>1: not allowed<br>2: under supervision<br>3: shared responsibility<br>4: full autonomy<br><b>Q18a_6_20_</b><br><b>TEXT</b> | <b>Q18a_7_20</b><br>1: not allowed<br>2: under supervision<br>3: shared responsibility<br>4: full autonomy<br><b>Q18a_7_20_</b><br><b>TEXT</b> |
|------------------------------------------------------------|----------------------------------------------------------------------------------------|----------------------------------------------------------------------------------------|------------------------------------------------------------------------------------------------------------------------------|----------------------------------------------------------------------------------------------------------------------------------------------|------------------------------------------------------------------------------------------------------------------------------------------------|-----------------------------------------------------------------------------------------------------------------------------------------------|------------------------------------------------------------------------------------------------------------------------------------------------|------------------------------------------------------------------------------------------------------------------------------------------------|

**Q10b/**Nurses can have different responsibilities within medicines management. We defined several tasks within 7 responsibilities beyond preparation and administration of medicines.

We want you to think about the ideal situation to obtain best quality of interprofessional care and patient outcomes. You do not have to indicate the current nursing situation.

Please indicate for each task, whether you think this could be a nursing task.

#### **RESPONSIBILITY 1: management of therapeutic and adverse effects of medicines.**

|                                                                                                                        | <b>Task <u>not</u> relevant</b><br>within management<br>of therapeutic and<br>adverse effects of<br>medicines. | <b>Task <u>PROHIBITED</u></b> for<br>nurses within<br>management of<br>therapeutic and adverse<br>effects of medicines. | <b>Task <u>PERMITTED</u></b> for nurses<br>within management of<br>therapeutic and adverse effects<br>of medicines. Specify the level<br>of responsibility. |
|------------------------------------------------------------------------------------------------------------------------|----------------------------------------------------------------------------------------------------------------|-------------------------------------------------------------------------------------------------------------------------|-------------------------------------------------------------------------------------------------------------------------------------------------------------|
| observation, documentation, registration, reporting                                                                    | <b>Q10b_3_1_1</b><br>Ticked = 1<br>Not ticked = 0                                                              | <b>Q10b_1_1_1</b><br>Ticked = 1<br>Not ticked = 0                                                                       | <b>Q10b_2_1</b><br>1: under supervision<br>2: shared responsibility<br>3: full autonomy                                                                     |
| assessing patients' competences                                                                                        | <b>Q10b_3_2_1</b><br>Ticked = 1<br>Not ticked = 0                                                              | <b>Q10b_1_2_1</b><br>Ticked = 1<br>Not ticked = 0                                                                       | <b>Q10b_2_2</b><br>1: under supervision<br>2: shared responsibility<br>3: full autonomy                                                                     |
| assessment and addressing patient/family needs                                                                         | <b>Q10b_3_3_1</b><br>Ticked = 1<br>Not ticked = 0                                                              | <b>Q10b_1_3_1</b><br>Ticked = 1<br>Not ticked = 0                                                                       | <b>Q10b_2_3</b><br>1: under supervision<br>2: shared responsibility<br>3: full autonomy                                                                     |
| recognising & preventing risks / complications / medication errors                                                     | <b>Q10b_3_4_1</b><br>Ticked = 1<br>Not ticked = 0                                                              | <b>Q10b_1_4_1</b><br>Ticked = 1<br>Not ticked = 0                                                                       | <b>Q10b_2_4</b><br>1: under supervision<br>2: shared responsibility<br>3: full autonomy                                                                     |
| identification, reporting and addressing contra-indications to administration, identification of drug related problems | <b>Q10b_3_5_1</b><br>Ticked = 1<br>Not ticked = 0                                                              | <b>Q10b_1_5_1</b><br>Ticked = 1<br>Not ticked = 0                                                                       | <b>Q10b_2_5</b><br>1: under supervision<br>2: shared responsibility<br>3: full autonomy                                                                     |
| follow-up                                                                                                              | <b>Q10b_3_6_1</b>                                                                                              | <b>Q10b_1_6_1</b>                                                                                                       | <b>Q10b_2_6</b>                                                                                                                                             |

|                                                                                                                                                            |                                                                             |                                                                             |                                                                                                                   |
|------------------------------------------------------------------------------------------------------------------------------------------------------------|-----------------------------------------------------------------------------|-----------------------------------------------------------------------------|-------------------------------------------------------------------------------------------------------------------|
|                                                                                                                                                            | Ticked = 1<br>Not ticked = 0                                                | Ticked = 1<br>Not ticked = 0                                                | 1: under supervision<br>2: shared responsibility<br>3: full autonomy                                              |
| Adhering to evidence based practice as described in clinical guidelines                                                                                    | <b>Q10b_3_7_1</b><br>Ticked = 1<br>Not ticked = 0                           | <b>Q10b_1_7_1</b><br>Ticked = 1<br>Not ticked = 0                           | <b>Q10b_2_7</b><br>1: under supervision<br>2: shared responsibility<br>3: full autonomy                           |
| decision making                                                                                                                                            | <b>Q10b_3_8_1</b><br>Ticked = 1<br>Not ticked = 0                           | <b>Q10b_1_8_1</b><br>Ticked = 1<br>Not ticked = 0                           | <b>Q10b_2_8</b><br>1: under supervision<br>2: shared responsibility<br>3: full autonomy                           |
| communication /discussion with patient/family                                                                                                              | <b>Q10b_3_9_1</b><br>Ticked = 1<br>Not ticked = 0                           | <b>Q10b_1_9_1</b><br>Ticked = 1<br>Not ticked = 0                           | <b>Q10b_2_9</b><br>1: under supervision<br>2: shared responsibility<br>3: full autonomy                           |
| Inter / intraprofessional referrals                                                                                                                        | <b>Q10b_3_10_1</b><br>Ticked = 1<br>Not ticked = 0                          | <b>Q10b_1_10_1</b><br>Ticked = 1<br>Not ticked = 0                          | <b>Q10b_2_10</b><br>1: under supervision<br>2: shared responsibility<br>3: full autonomy                          |
| facilitation of medication management                                                                                                                      | <b>Q10b_3_12_1</b><br>Ticked = 1<br>Not ticked = 0                          | <b>Q10b_1_12_1</b><br>Ticked = 1<br>Not ticked = 0                          | <b>Q10b_2_12</b><br>1: under supervision<br>2: shared responsibility<br>3: full autonomy                          |
| self-care support and education of patients                                                                                                                | <b>Q10b_3_15_1</b><br>Ticked = 1<br>Not ticked = 0                          | <b>Q10b_1_15_1</b><br>Ticked = 1<br>Not ticked = 0                          | <b>Q10b_2_15</b><br>1: under supervision<br>2: shared responsibility<br>3: full autonomy                          |
| advice (to patient or other healthcare professional)                                                                                                       | <b>Q10b_3_16_1</b><br>Ticked = 1<br>Not ticked = 0                          | <b>Q10b_1_16_1</b><br>Ticked = 1<br>Not ticked = 0                          | <b>Q10b_2_16</b><br>1: under supervision<br>2: shared responsibility<br>3: full autonomy                          |
| transitional care communication, inter / intraprofessional collaboration / communication including reporting, advising, informing, alerting and discussing | <b>Q10b_3_17_1</b><br>Ticked = 1<br>Not ticked = 0                          | <b>Q10b_1_17_1</b><br>Ticked = 1<br>Not ticked = 0                          | <b>Q10b_2_17</b><br>1: under supervision<br>2: shared responsibility<br>3: full autonomy                          |
| mentoring colleagues                                                                                                                                       | <b>Q10b_3_18_1</b><br>Ticked = 1<br>Not ticked = 0                          | <b>Q10b_1_18_1</b><br>Ticked = 1<br>Not ticked = 0                          | <b>Q10b_2_18</b><br>1: under supervision<br>2: shared responsibility<br>3: full autonomy                          |
| other task within management of therapeutic and adverse effects of medicines: PLEASE SPECIFY                                                               | <b>Q10b_3_19_1</b><br>Ticked = 1<br>Not ticked = 0<br><b>Q10b_3_19_TEXT</b> | <b>Q10b_1_19_1</b><br>Ticked = 1<br>Not ticked = 0<br><b>Q10b_1_19_TEXT</b> | <b>Q10b_2_19</b><br>1: under supervision<br>2: shared responsibility<br>3: full autonomy<br><b>Q10b_2_19_TEXT</b> |

**Q11b/ [Responsibility 2: management of medicines adherence.](#)**

|                                                                                    | <b>Task <u>not</u> relevant</b><br>within<br>management of<br>medicines<br>adherence. | <b>Task <u>not</u> allowed</b> for<br>nurses within<br>management of<br>medicines<br>adherence. | <b>Task <u>allowed</u></b> for nurses<br>within management of<br>medicines adherence.<br>Specify the level of<br>responsibility. |
|------------------------------------------------------------------------------------|---------------------------------------------------------------------------------------|-------------------------------------------------------------------------------------------------|----------------------------------------------------------------------------------------------------------------------------------|
| observation, documentation, registration, report                                   | <b>Q11b_3_1_1</b><br>Ticked = 1<br>Not ticked = 0                                     | <b>Q11b_1_1_1</b><br>Ticked = 1<br>Not ticked = 0                                               | <b>Q11b_2_1</b><br>1: under supervision<br>2: shared responsibility<br>3: full autonomy                                          |
| assessing patients competences                                                     | <b>Q11b_3_2_1</b><br>Ticked = 1<br>Not ticked = 0                                     | <b>Q11b_1_2_1</b><br>Ticked = 1<br>Not ticked = 0                                               | <b>Q11b_2_2</b><br>1: under supervision<br>2: shared responsibility<br>3: full autonomy                                          |
| assessment and addressing patient/family needs                                     | <b>Q10b_3_3_1</b><br>Ticked = 1<br>Not ticked = 0                                     | <b>Q11b_1_3_1</b><br>Ticked = 1<br>Not ticked = 0                                               | <b>Q11b_2_3</b><br>1: under supervision<br>2: shared responsibility<br>3: full autonomy                                          |
| recognising & preventing risks / complications / medication errors                 | <b>Q10b_3_4_1</b><br>Ticked = 1<br>Not ticked = 0                                     | <b>Q11b_1_4_1</b><br>Ticked = 1<br>Not ticked = 0                                               | <b>Q11b_2_4</b><br>1: under supervision<br>2: shared responsibility<br>3: full autonomy                                          |
| identification, reporting and addressing contra-indications, drug related problems | <b>Q10b_3_5_1</b><br>Ticked = 1<br>Not ticked = 0                                     | <b>Q11b_1_5_1</b><br>Ticked = 1<br>Not ticked = 0                                               | <b>Q11b_2_5</b><br>1: under supervision<br>2: shared responsibility<br>3: full autonomy                                          |
| follow-up                                                                          | <b>Q10b_3_6_1</b><br>Ticked = 1<br>Not ticked = 0                                     | <b>Q11b_1_6_1</b><br>Ticked = 1<br>Not ticked = 0                                               | <b>Q11b_2_6</b><br>1: under supervision<br>2: shared responsibility<br>3: full autonomy                                          |
| evidence based practice                                                            | <b>Q10b_3_7_1</b><br>Ticked = 1<br>Not ticked = 0                                     | <b>Q11b_1_7_1</b><br>Ticked = 1<br>Not ticked = 0                                               | <b>Q11b_2_7</b><br>1: under supervision<br>2: shared responsibility<br>3: full autonomy                                          |
| decision making                                                                    | <b>Q10b_3_8_1</b><br>Ticked = 1<br>Not ticked = 0                                     | <b>Q11b_1_8_1</b><br>Ticked = 1<br>Not ticked = 0                                               | <b>Q11b_2_8</b><br>1: under supervision<br>2: shared responsibility<br>3: full autonomy                                          |
| communication /discussion with patient/family                                      | <b>Q10b_3_9_1</b><br>Ticked = 1<br>Not ticked = 0                                     | <b>Q11b_1_9_1</b><br>Ticked = 1<br>Not ticked = 0                                               | <b>Q11b_2_9</b><br>1: under supervision<br>2: shared responsibility<br>3: full autonomy                                          |
| detection of non-adherence, drug abuse/misuse                                      | <b>Q11b_3_10_1</b><br>Ticked = 1<br>Not ticked = 0                                    | <b>Q11b_1_10_1</b><br>Ticked = 1<br>Not ticked = 0                                              | <b>Q11b_2_10</b><br>1: under supervision<br>2: shared responsibility<br>3: full autonomy                                         |
| motivational interviewing                                                          | <b>Q11b_3_11_1</b><br>Ticked = 1                                                      | <b>Q11b_1_11_1</b><br>Ticked = 1                                                                | <b>Q11b_2_11</b><br>1: under supervision                                                                                         |

|                                                                                                                                                            |                                                                             |                                                                             |                                                                                                                   |
|------------------------------------------------------------------------------------------------------------------------------------------------------------|-----------------------------------------------------------------------------|-----------------------------------------------------------------------------|-------------------------------------------------------------------------------------------------------------------|
|                                                                                                                                                            | Not ticked = 0                                                              | Not ticked = 0                                                              | 2: shared responsibility<br>3: full autonomy                                                                      |
| Inter / intraprofessional referrals                                                                                                                        | <b>Q11b_3_12_1</b><br>Ticked = 1<br>Not ticked = 0                          | <b>Q11b_1_12_1</b><br>Ticked = 1<br>Not ticked = 0                          | <b>Q11b_2_12</b><br>1: under supervision<br>2: shared responsibility<br>3: full autonomy                          |
| facilitation of medication management                                                                                                                      | <b>Q11b_3_14_1</b><br>Ticked = 1<br>Not ticked = 0                          | <b>Q11b_1_14_1</b><br>Ticked = 1<br>Not ticked = 0                          | <b>Q11b_2_14</b><br>1: under supervision<br>2: shared responsibility<br>3: full autonomy                          |
| selfcare support and therapeutic education                                                                                                                 | <b>Q11b_3_17_1</b><br>Ticked = 1<br>Not ticked = 0                          | <b>Q11b_1_17_1</b><br>Ticked = 1<br>Not ticked = 0                          | <b>Q11b_2_17</b><br>1: under supervision<br>2: shared responsibility<br>3: full autonomy                          |
| advice (patient or other healthcare professional)                                                                                                          | <b>Q11b_3_18_1</b><br>Ticked = 1<br>Not ticked = 0                          | <b>Q11b_1_18_1</b><br>Ticked = 1<br>Not ticked = 0                          | <b>Q11b_2_18</b><br>1: under supervision<br>2: shared responsibility<br>3: full autonomy                          |
| transitional care communication, inter / intraprofessional collaboration / communication including reporting, advising, informing, alerting and discussing | <b>Q11b_3_19_1</b><br>Ticked = 1<br>Not ticked = 0                          | <b>Q11b_1_19_1</b><br>Ticked = 1<br>Not ticked = 0                          | <b>Q11b_2_19</b><br>1: under supervision<br>2: shared responsibility<br>3: full autonomy                          |
| collegial mentoring                                                                                                                                        | <b>Q11b_3_20_1</b><br>Ticked = 1<br>Not ticked = 0                          | <b>Q11b_1_20_1</b><br>Ticked = 1<br>Not ticked = 0                          | <b>Q11b_2_20</b><br>1: under supervision<br>2: shared responsibility<br>3: full autonomy                          |
| other task within management of medicines adherence:                                                                                                       | <b>Q11b_3_21_1</b><br>Ticked = 1<br>Not ticked = 0<br><b>Q11b_3_21_TEXT</b> | <b>Q11b_1_21_1</b><br>Ticked = 1<br>Not ticked = 0<br><b>Q11b_1_21_TEXT</b> | <b>Q11b_2_21</b><br>1: under supervision<br>2: shared responsibility<br>3: full autonomy<br><b>Q11b_2_21_TEXT</b> |

#### Q12b/ Responsibility 3: management of patient medication self-management.

|                                                  |                                                                                          |                                                                                                    |                                                                                                                                     |
|--------------------------------------------------|------------------------------------------------------------------------------------------|----------------------------------------------------------------------------------------------------|-------------------------------------------------------------------------------------------------------------------------------------|
|                                                  | <b>Task <u>not</u> relevant</b> within management of patient medication self-management. | <b>Task <u>not</u> allowed</b> for nurses within management of patient medication self-management. | <b>Task <u>allowed</u></b> for nurses within management of patient medication self-management. Specify the level of responsibility. |
| observation, documentation, registration, report | <b>Q12b_3_1_1</b><br>Ticked = 1<br>Not ticked = 0                                        | <b>Q12b_1_1_1</b><br>Ticked = 1<br>Not ticked = 0                                                  | <b>Q12b_2_1</b><br>1: under supervision<br>2: shared responsibility<br>3: full autonomy                                             |
| assessing patients competences                   | <b>Q12b_3_2_1</b>                                                                        | <b>Q12b_1_2_1</b>                                                                                  | <b>Q12b_2_2</b>                                                                                                                     |

|                                                                                    |                                                    |                                                    |                                                                                          |
|------------------------------------------------------------------------------------|----------------------------------------------------|----------------------------------------------------|------------------------------------------------------------------------------------------|
|                                                                                    | Ticked = 1<br>Not ticked = 0                       | Ticked = 1<br>Not ticked = 0                       | 1: under supervision<br>2: shared responsibility<br>3: full autonomy                     |
| assessment and addressing patient/family needs                                     | <b>Q12b_3_3_1</b><br>Ticked = 1<br>Not ticked = 0  | <b>Q12b_1_3_1</b><br>Ticked = 1<br>Not ticked = 0  | <b>Q12b_2_3</b><br>1: under supervision<br>2: shared responsibility<br>3: full autonomy  |
| recognising & preventing risks / complications / medication errors                 | <b>Q12b_3_4_1</b><br>Ticked = 1<br>Not ticked = 0  | <b>Q12b_1_4_1</b><br>Ticked = 1<br>Not ticked = 0  | <b>Q12b_2_4</b><br>1: under supervision<br>2: shared responsibility<br>3: full autonomy  |
| identification, reporting and addressing contra-indications, drug related problems | <b>Q12b_3_5_1</b><br>Ticked = 1<br>Not ticked = 0  | <b>Q12b_1_5_1</b><br>Ticked = 1<br>Not ticked = 0  | <b>Q12b_2_5</b><br>1: under supervision<br>2: shared responsibility<br>3: full autonomy  |
| follow-up                                                                          | <b>Q12b_3_6_1</b><br>Ticked = 1<br>Not ticked = 0  | <b>Q12b_1_6_1</b><br>Ticked = 1<br>Not ticked = 0  | <b>Q12b_2_6</b><br>1: under supervision<br>2: shared responsibility<br>3: full autonomy  |
| evidence based practice                                                            | <b>Q12b_3_7_1</b><br>Ticked = 1<br>Not ticked = 0  | <b>Q12b_1_7_1</b><br>Ticked = 1<br>Not ticked = 0  | <b>Q12b_2_7</b><br>1: under supervision<br>2: shared responsibility<br>3: full autonomy  |
| decision making                                                                    | <b>Q12b_3_8_1</b><br>Ticked = 1<br>Not ticked = 0  | <b>Q12b_1_8_1</b><br>Ticked = 1<br>Not ticked = 0  | <b>Q12b_2_8</b><br>1: under supervision<br>2: shared responsibility<br>3: full autonomy  |
| communication /discussion with patient/family                                      | <b>Q12b_3_9_1</b><br>Ticked = 1<br>Not ticked = 0  | <b>Q12b_1_9_1</b><br>Ticked = 1<br>Not ticked = 0  | <b>Q12b_2_9</b><br>1: under supervision<br>2: shared responsibility<br>3: full autonomy  |
| motivational interviewing                                                          | <b>Q12b_3_10_1</b><br>Ticked = 1<br>Not ticked = 0 | <b>Q12b_1_10_1</b><br>Ticked = 1<br>Not ticked = 0 | <b>Q12b_2_10</b><br>1: under supervision<br>2: shared responsibility<br>3: full autonomy |
| Inter / intraprofessional referrals                                                | <b>Q12b_3_11_1</b><br>Ticked = 1<br>Not ticked = 0 | <b>Q12b_1_11_1</b><br>Ticked = 1<br>Not ticked = 0 | <b>Q12b_2_11</b><br>1: under supervision<br>2: shared responsibility<br>3: full autonomy |
| facilitation of medication management                                              | <b>Q12b_3_13_1</b><br>Ticked = 1<br>Not ticked = 0 | <b>Q12b_1_13_1</b><br>Ticked = 1<br>Not ticked = 0 | <b>Q12b_2_13</b><br>1: under supervision<br>2: shared responsibility<br>3: full autonomy |
| selfcare support and therapeutic education                                         | <b>Q12b_3_16_1</b><br>Ticked = 1<br>Not ticked = 0 | <b>Q12b_1_16_1</b><br>Ticked = 1<br>Not ticked = 0 | <b>Q12b_2_16</b><br>1: under supervision<br>2: shared responsibility<br>3: full autonomy |
| advice (patient or other healthcare professional)                                  | <b>Q12b_3_17_1</b><br>Ticked = 1<br>Not ticked = 0 | <b>Q12b_1_17_1</b><br>Ticked = 1<br>Not ticked = 0 | <b>Q12b_2_17</b><br>1: under supervision<br>2: shared responsibility                     |

|                                                                                                                                                            |                                                                             |                                                                             |                                                                                                                   |
|------------------------------------------------------------------------------------------------------------------------------------------------------------|-----------------------------------------------------------------------------|-----------------------------------------------------------------------------|-------------------------------------------------------------------------------------------------------------------|
|                                                                                                                                                            |                                                                             |                                                                             | 3: full autonomy                                                                                                  |
| transitional care communication, inter / intraprofessional collaboration / communication including reporting, advising, informing, alerting and discussing | <b>Q12b_3_18_1</b><br>Ticked = 1<br>Not ticked = 0                          | <b>Q12b_1_18_1</b><br>Ticked = 1<br>Not ticked = 0                          | <b>Q12b_2_18</b><br>1: under supervision<br>2: shared responsibility<br>3: full autonomy                          |
| collegial mentoring                                                                                                                                        | <b>Q12b_3_19_1</b><br>Ticked = 1<br>Not ticked = 0                          | <b>Q12b_1_19_1</b><br>Ticked = 1<br>Not ticked = 0                          | <b>Q12b_2_19</b><br>1: under supervision<br>2: shared responsibility<br>3: full autonomy                          |
| other task within management of patient medication self-management:                                                                                        | <b>Q12b_3_20_1</b><br>Ticked = 1<br>Not ticked = 0<br><b>Q12b_3_20_TEXT</b> | <b>Q12b_1_20_1</b><br>Ticked = 1<br>Not ticked = 0<br><b>Q12b_1_20_TEXT</b> | <b>Q12b_2_20</b><br>1: under supervision<br>2: shared responsibility<br>3: full autonomy<br><b>Q12b_2_20_TEXT</b> |

**Q13b/ Responsibility 4: management of patient education and information.**

|                                                  | <b>Task <u>not</u> relevant</b><br>within<br>management of<br>patient education<br>and information. | <b>Task <u>not</u> allowed</b> for<br>nurses within<br>management of<br>patient education<br>and information. | <b>Task <u>allowed</u></b> for nurses<br>within management of<br>patient education and<br>information. Specify the<br>level of responsibility. |
|--------------------------------------------------|-----------------------------------------------------------------------------------------------------|---------------------------------------------------------------------------------------------------------------|------------------------------------------------------------------------------------------------------------------------------------------------|
| observation, documentation, registration, report | <b>Q13b_3_1_1</b><br>Ticked = 1<br>Not ticked = 0                                                   | <b>Q13b_1_1_1</b><br>Ticked = 1<br>Not ticked = 0                                                             | <b>Q13b_2_1</b><br>1: under supervision<br>2: shared responsibility<br>3: full autonomy                                                        |
| assessing patients competences                   | <b>Q13b_3_2_1</b><br>Ticked = 1<br>Not ticked = 0                                                   | <b>Q13b_1_2_1</b><br>Ticked = 1<br>Not ticked = 0                                                             | <b>Q13b_2_2</b><br>1: under supervision<br>2: shared responsibility<br>3: full autonomy                                                        |
| assessment and addressing patient/family needs   | <b>Q13b_3_3_1</b><br>Ticked = 1<br>Not ticked = 0                                                   | <b>Q13b_1_3_1</b><br>Ticked = 1<br>Not ticked = 0                                                             | <b>Q13b_2_3</b><br>1: under supervision<br>2: shared responsibility<br>3: full autonomy                                                        |
| follow-up                                        | <b>Q13b_3_4_1</b><br>Ticked = 1<br>Not ticked = 0                                                   | <b>Q13b_1_4_1</b><br>Ticked = 1<br>Not ticked = 0                                                             | <b>Q13b_2_4</b><br>1: under supervision<br>2: shared responsibility<br>3: full autonomy                                                        |
| evidence based practice                          | <b>Q13b_3_5_1</b><br>Ticked = 1<br>Not ticked = 0                                                   | <b>Q13b_1_5_1</b><br>Ticked = 1<br>Not ticked = 0                                                             | <b>Q13b_2_5</b><br>1: under supervision<br>2: shared responsibility<br>3: full autonomy                                                        |
| decision making                                  | <b>Q13b_3_6_1</b>                                                                                   | <b>Q13b_1_6_1</b>                                                                                             | <b>Q13b_2_6</b>                                                                                                                                |



|                                                                                                                                                                     |                                                                             |                                                                             |                                                                                                                   |
|---------------------------------------------------------------------------------------------------------------------------------------------------------------------|-----------------------------------------------------------------------------|-----------------------------------------------------------------------------|-------------------------------------------------------------------------------------------------------------------|
|                                                                                                                                                                     | Ticked = 1<br>Not ticked = 0                                                | Ticked = 1<br>Not ticked = 0                                                | 1: under supervision<br>2: shared responsibility<br>3: full autonomy                                              |
| communication /discussion with patient/family                                                                                                                       | <b>Q13b_3_7_1</b><br>Ticked = 1<br>Not ticked = 0                           | <b>Q13b_1_7_1</b><br>Ticked = 1<br>Not ticked = 0                           | <b>Q13b_2_7</b><br>1: under supervision<br>2: shared responsibility<br>3: full autonomy                           |
| motivational interviewing                                                                                                                                           | <b>Q13b_3_8_1</b><br>Ticked = 1<br>Not ticked = 0                           | <b>Q13b_1_8_1</b><br>Ticked = 1<br>Not ticked = 0                           | <b>Q13b_2_8</b><br>1: under supervision<br>2: shared responsibility<br>3: full autonomy                           |
| Inter / intraprofessional referrals                                                                                                                                 | <b>Q13b_3_9_1</b><br>Ticked = 1<br>Not ticked = 0                           | <b>Q13b_1_9_1</b><br>Ticked = 1<br>Not ticked = 0                           | <b>Q13b_2_9</b><br>1: under supervision<br>2: shared responsibility<br>3: full autonomy                           |
| facilitation of medication management                                                                                                                               | <b>Q13b_3_11_1</b><br>Ticked = 1<br>Not ticked = 0                          | <b>Q13b_1_11_1</b><br>Ticked = 1<br>Not ticked = 0                          | <b>Q13b_2_11</b><br>1: under supervision<br>2: shared responsibility<br>3: full autonomy                          |
| selfcare support and therapeutic education                                                                                                                          | <b>Q13b_3_14_1</b><br>Ticked = 1<br>Not ticked = 0                          | <b>Q13b_1_14_1</b><br>Ticked = 1<br>Not ticked = 0                          | <b>Q13b_2_14</b><br>1: under supervision<br>2: shared responsibility<br>3: full autonomy                          |
| advice (patient or other healthcare professional)                                                                                                                   | <b>Q13b_3_15_1</b><br>Ticked = 1<br>Not ticked = 0                          | <b>Q13b_1_15_1</b><br>Ticked = 1<br>Not ticked = 0                          | <b>Q13b_2_15</b><br>1: under supervision<br>2: shared responsibility<br>3: full autonomy                          |
| transitional care communication, inter /<br>intraprofessional collaboration / communication<br>including reporting, advising, informing, alerting<br>and discussing | <b>Q13b_3_16_1</b><br>Ticked = 1<br>Not ticked = 0                          | <b>Q13b_1_16_1</b><br>Ticked = 1<br>Not ticked = 0                          | <b>Q13b_2_16</b><br>1: under supervision<br>2: shared responsibility<br>3: full autonomy                          |
| collegial mentoring                                                                                                                                                 | <b>Q13b_3_17_1</b><br>Ticked = 1<br>Not ticked = 0                          | <b>Q13b_1_17_1</b><br>Ticked = 1<br>Not ticked = 0                          | <b>Q13b_2_17</b><br>1: under supervision<br>2: shared responsibility<br>3: full autonomy                          |
| other task within management of patient<br>education and information:                                                                                               | <b>Q13b_3_18_1</b><br>Ticked = 1<br>Not ticked = 0<br><b>Q13b_3_18_TEXT</b> | <b>Q13b_1_18_1</b><br>Ticked = 1<br>Not ticked = 0<br><b>Q13b_1_18_TEXT</b> | <b>Q13b_2_18</b><br>1: under supervision<br>2: shared responsibility<br>3: full autonomy<br><b>Q13b_2_18_TEXT</b> |

**Q14b/ Responsibility 5: prescription management.**

|                                                                                        | <b>Task <u>not</u> relevant</b><br>within<br>prescription<br>management. | <b>Task <u>not</u> allowed for</b><br>nurses within<br>prescription<br>management. | <b>Task <u>allowed</u> for nurses</b><br>within prescription<br>management. Specify the<br>level of responsibility. |
|----------------------------------------------------------------------------------------|--------------------------------------------------------------------------|------------------------------------------------------------------------------------|---------------------------------------------------------------------------------------------------------------------|
| observation, documentation, registration, report                                       | <b>Q14b_3_1_1</b><br>Ticked = 1<br>Not ticked = 0                        | <b>Q14b_1_1_1</b><br>Ticked = 1<br>Not ticked = 0                                  | <b>Q14b_2_1</b><br>1: under supervision<br>2: shared responsibility<br>3: full autonomy                             |
| assessing patients competences                                                         | <b>Q14b_3_2_1</b><br>Ticked = 1<br>Not ticked = 0                        | <b>Q14b_1_2_1</b><br>Ticked = 1<br>Not ticked = 0                                  | <b>Q14b_2_2</b><br>1: under supervision<br>2: shared responsibility<br>3: full autonomy                             |
| assessment and addressing patient/family needs                                         | <b>Q14b_3_3_1</b><br>Ticked = 1<br>Not ticked = 0                        | <b>Q14b_1_3_1</b><br>Ticked = 1<br>Not ticked = 0                                  | <b>Q14b_2_3</b><br>1: under supervision<br>2: shared responsibility<br>3: full autonomy                             |
| recognising & preventing risks / complications /<br>medication errors                  | <b>Q14b_3_4_1</b><br>Ticked = 1<br>Not ticked = 0                        | <b>Q14b_1_4_1</b><br>Ticked = 1<br>Not ticked = 0                                  | <b>Q14b_2_4</b><br>1: under supervision<br>2: shared responsibility<br>3: full autonomy                             |
| identification, reporting and addressing contra-<br>indications, drug related problems | <b>Q14b_3_5_1</b><br>Ticked = 1<br>Not ticked = 0                        | <b>Q14b_1_5_1</b><br>Ticked = 1<br>Not ticked = 0                                  | <b>Q14b_2_5</b><br>1: under supervision<br>2: shared responsibility<br>3: full autonomy                             |
| follow-up                                                                              | <b>Q14b_3_6_1</b><br>Ticked = 1<br>Not ticked = 0                        | <b>Q14b_1_6_1</b><br>Ticked = 1<br>Not ticked = 0                                  | <b>Q14b_2_6</b><br>1: under supervision<br>2: shared responsibility<br>3: full autonomy                             |
| evidence based practice                                                                | <b>Q14b_3_7_1</b><br>Ticked = 1<br>Not ticked = 0                        | <b>Q14b_1_7_1</b><br>Ticked = 1<br>Not ticked = 0                                  | <b>Q14b_2_7</b><br>1: under supervision<br>2: shared responsibility<br>3: full autonomy                             |
| decision making                                                                        | <b>Q14b_3_8_1</b><br>Ticked = 1<br>Not ticked = 0                        | <b>Q14b_1_8_1</b><br>Ticked = 1<br>Not ticked = 0                                  | <b>Q14b_2_8</b><br>1: under supervision<br>2: shared responsibility<br>3: full autonomy                             |
| communication /discussion with patient/family                                          | <b>Q14b_3_9_1</b><br>Ticked = 1<br>Not ticked = 0                        | <b>Q14b_1_9_1</b><br>Ticked = 1<br>Not ticked = 0                                  | <b>Q14b_2_9</b><br>1: under supervision<br>2: shared responsibility<br>3: full autonomy                             |
| Inter / intraprofessional referrals                                                    | <b>Q14b_3_10_1</b><br>Ticked = 1<br>Not ticked = 0                       | <b>Q14b_1_10_1</b><br>Ticked = 1<br>Not ticked = 0                                 | <b>Q14b_2_10</b><br>1: under supervision<br>2: shared responsibility<br>3: full autonomy                            |
| facilitation of medication management                                                  | <b>Q14b_3_12_1</b><br>Ticked = 1<br>Not ticked = 0                       | <b>Q14b_1_12_1</b><br>Ticked = 1<br>Not ticked = 0                                 | <b>Q14b_2_12</b><br>1: under supervision<br>2: shared responsibility<br>3: full autonomy                            |

|                                                                                                                                                                     |                                                    |                                                    |                                                                                          |
|---------------------------------------------------------------------------------------------------------------------------------------------------------------------|----------------------------------------------------|----------------------------------------------------|------------------------------------------------------------------------------------------|
| advice (patient or other healthcare professional)                                                                                                                   | <b>Q14b_3_14_1</b><br>Ticked = 1<br>Not ticked = 0 | <b>Q14b_1_14_1</b><br>Ticked = 1<br>Not ticked = 0 | <b>Q14b_2_14</b><br>1: under supervision<br>2: shared responsibility<br>3: full autonomy |
| determination of type/dosage                                                                                                                                        | <b>Q14b_3_15_1</b><br>Ticked = 1<br>Not ticked = 0 | <b>Q14b_1_15_1</b><br>Ticked = 1<br>Not ticked = 0 | <b>Q14b_2_15</b><br>1: under supervision<br>2: shared responsibility<br>3: full autonomy |
| initiation of medication (reactive / proactive)                                                                                                                     | <b>Q14b_3_16_1</b><br>Ticked = 1<br>Not ticked = 0 | <b>Q14b_1_16_1</b><br>Ticked = 1<br>Not ticked = 0 | <b>Q14b_2_16</b><br>1: under supervision<br>2: shared responsibility<br>3: full autonomy |
| adaptation of dose, dose titration                                                                                                                                  | <b>Q14b_3_17_1</b><br>Ticked = 1<br>Not ticked = 0 | <b>Q14b_1_17_1</b><br>Ticked = 1<br>Not ticked = 0 | <b>Q14b_2_17</b><br>1: under supervision<br>2: shared responsibility<br>3: full autonomy |
| decision on continuation /cessation of medication                                                                                                                   | <b>Q14b_3_18_1</b><br>Ticked = 1<br>Not ticked = 0 | <b>Q14b_1_18_1</b><br>Ticked = 1<br>Not ticked = 0 | <b>Q14b_2_18</b><br>1: under supervision<br>2: shared responsibility<br>3: full autonomy |
| PRN (pro re nata, 'if needed' medication) /<br>standing prescription renewal order                                                                                  | <b>Q14b_3_19_1</b><br>Ticked = 1<br>Not ticked = 0 | <b>Q14b_1_19_1</b><br>Ticked = 1<br>Not ticked = 0 | <b>Q14b_2_19</b><br>1: under supervision<br>2: shared responsibility<br>3: full autonomy |
| medication reconciliation                                                                                                                                           | <b>Q14b_3_20_1</b><br>Ticked = 1<br>Not ticked = 0 | <b>Q14b_1_20_1</b><br>Ticked = 1<br>Not ticked = 0 | <b>Q14b_2_20</b><br>1: under supervision<br>2: shared responsibility<br>3: full autonomy |
| medication review                                                                                                                                                   | <b>Q14b_3_21_1</b><br>Ticked = 1<br>Not ticked = 0 | <b>Q14b_1_21_1</b><br>Ticked = 1<br>Not ticked = 0 | <b>Q14b_2_21</b><br>1: under supervision<br>2: shared responsibility<br>3: full autonomy |
| intervention in case of emergency                                                                                                                                   | <b>Q14b_3_22_1</b><br>Ticked = 1<br>Not ticked = 0 | <b>Q14b_1_22_1</b><br>Ticked = 1<br>Not ticked = 0 | <b>Q14b_2_22</b><br>1: under supervision<br>2: shared responsibility<br>3: full autonomy |
| transitional care communication, inter /<br>intraprofessional collaboration / communication<br>including reporting, advising, informing, alerting<br>and discussing | <b>Q14b_3_23_1</b><br>Ticked = 1<br>Not ticked = 0 | <b>Q14b_1_23_1</b><br>Ticked = 1<br>Not ticked = 0 | <b>Q14b_2_23</b><br>1: under supervision<br>2: shared responsibility<br>3: full autonomy |
| collegial mentoring                                                                                                                                                 | <b>Q14b_3_24_1</b><br>Ticked = 1<br>Not ticked = 0 | <b>Q14b_1_24_1</b><br>Ticked = 1<br>Not ticked = 0 | <b>Q14b_2_24</b><br>1: under supervision<br>2: shared responsibility<br>3: full autonomy |
| other task within prescription management:                                                                                                                          | <b>Q14b_3_25_1</b><br>Ticked = 1<br>Not ticked = 0 | <b>Q14b_1_25_1</b><br>Ticked = 1<br>Not ticked = 0 | <b>Q14b_2_25</b><br>1: under supervision<br>2: shared responsibility                     |

|  |                       |                       |                                           |
|--|-----------------------|-----------------------|-------------------------------------------|
|  | <b>Q14b_3_25_TEXT</b> | <b>Q14b_1_25_TEXT</b> | 3: full autonomy<br><b>Q14b_2_25_TEXT</b> |
|--|-----------------------|-----------------------|-------------------------------------------|

**Q17b/ Responsibility 6: medication safety management.**

|                                                                                        | <b>Task not relevant</b><br>within medication<br>safety<br>management. | <b>Task not allowed</b> for<br>nurses within<br>medication safety<br>management. | <b>Task allowed</b> for nurses<br>within medication safety<br>management. Specify the<br>level of responsibility. |
|----------------------------------------------------------------------------------------|------------------------------------------------------------------------|----------------------------------------------------------------------------------|-------------------------------------------------------------------------------------------------------------------|
| observation, documentation, registration, report                                       | <b>Q17b_3_1_1</b><br>Ticked = 1<br>Not ticked = 0                      | <b>Q17b_1_1_1</b><br>Ticked = 1<br>Not ticked = 0                                | <b>Q17b_2_1</b><br>1: under supervision<br>2: shared responsibility<br>3: full autonomy                           |
| assessing patients competences                                                         | <b>Q17b_3_2_1</b><br>Ticked = 1<br>Not ticked = 0                      | <b>Q17b_1_2_1</b><br>Ticked = 1<br>Not ticked = 0                                | <b>Q17b_2_2</b><br>1: under supervision<br>2: shared responsibility<br>3: full autonomy                           |
| assessment and addressing patient/family needs                                         | <b>Q17b_3_3_1</b><br>Ticked = 1<br>Not ticked = 0                      | <b>Q17b_1_3_1</b><br>Ticked = 1<br>Not ticked = 0                                | <b>Q17b_2_3</b><br>1: under supervision<br>2: shared responsibility<br>3: full autonomy                           |
| recognising & preventing risks / complications /<br>medication errors                  | <b>Q17b_3_4_1</b><br>Ticked = 1<br>Not ticked = 0                      | <b>Q17b_1_4_1</b><br>Ticked = 1<br>Not ticked = 0                                | <b>Q17b_2_4</b><br>1: under supervision<br>2: shared responsibility<br>3: full autonomy                           |
| identification, reporting and addressing contra-<br>indications, drug related problems | <b>Q17b_3_5_1</b><br>Ticked = 1<br>Not ticked = 0                      | <b>Q17b_1_5_1</b><br>Ticked = 1<br>Not ticked = 0                                | <b>Q17b_2_5</b><br>1: under supervision<br>2: shared responsibility<br>3: full autonomy                           |
| follow-up                                                                              | <b>Q17b_3_6_1</b><br>Ticked = 1<br>Not ticked = 0                      | <b>Q17b_1_6_1</b><br>Ticked = 1<br>Not ticked = 0                                | <b>Q17b_2_6</b><br>1: under supervision<br>2: shared responsibility<br>3: full autonomy                           |
| evidence based practice                                                                | <b>Q17b_3_7_1</b><br>Ticked = 1<br>Not ticked = 0                      | <b>Q17b_1_7_1</b><br>Ticked = 1<br>Not ticked = 0                                | <b>Q17b_2_7</b><br>1: under supervision<br>2: shared responsibility<br>3: full autonomy                           |
| decision making                                                                        | <b>Q17b_3_8_1</b><br>Ticked = 1<br>Not ticked = 0                      | <b>Q17b_1_8_1</b><br>Ticked = 1<br>Not ticked = 0                                | <b>Q17b_2_8</b><br>1: under supervision<br>2: shared responsibility<br>3: full autonomy                           |
| communication /discussion with patient/family                                          | <b>Q17b_3_9_1</b><br>Ticked = 1<br>Not ticked = 0                      | <b>Q17b_1_9_1</b><br>Ticked = 1<br>Not ticked = 0                                | <b>Q17b_2_9</b><br>1: under supervision<br>2: shared responsibility<br>3: full autonomy                           |

|                                                                                                                                                            |                                                                             |                                                                             |                                                                                                                   |
|------------------------------------------------------------------------------------------------------------------------------------------------------------|-----------------------------------------------------------------------------|-----------------------------------------------------------------------------|-------------------------------------------------------------------------------------------------------------------|
| Inter / intraprofessional referrals                                                                                                                        | <b>Q17b_3_10_1</b><br>Ticked = 1<br>Not ticked = 0                          | <b>Q17b_1_10_1</b><br>Ticked = 1<br>Not ticked = 0                          | <b>Q17b_2_10</b><br>1: under supervision<br>2: shared responsibility<br>3: full autonomy                          |
| facilitation of medication management                                                                                                                      | <b>Q17b_3_12_1</b><br>Ticked = 1<br>Not ticked = 0                          | <b>Q17b_1_12_1</b><br>Ticked = 1<br>Not ticked = 0                          | <b>Q17b_2_12</b><br>1: under supervision<br>2: shared responsibility<br>3: full autonomy                          |
| selfcare support and therapeutic education                                                                                                                 | <b>Q17b_3_15_1</b><br>Ticked = 1<br>Not ticked = 0                          | <b>Q17b_1_15_1</b><br>Ticked = 1<br>Not ticked = 0                          | <b>Q17b_2_15</b><br>1: under supervision<br>2: shared responsibility<br>3: full autonomy                          |
| advice (patient or other healthcare professional)                                                                                                          | <b>Q17b_3_16_1</b><br>Ticked = 1<br>Not ticked = 0                          | <b>Q17b_1_16_1</b><br>Ticked = 1<br>Not ticked = 0                          | <b>Q17b_2_16</b><br>1: under supervision<br>2: shared responsibility<br>3: full autonomy                          |
| intervention in case of emergency                                                                                                                          | <b>Q17b_3_17_1</b><br>Ticked = 1<br>Not ticked = 0                          | <b>Q17b_1_17_1</b><br>Ticked = 1<br>Not ticked = 0                          | <b>Q17b_2_17</b><br>1: under supervision<br>2: shared responsibility<br>3: full autonomy                          |
| transitional care communication, inter / intraprofessional collaboration / communication including reporting, advising, informing, alerting and discussing | <b>Q17b_3_18_1</b><br>Ticked = 1<br>Not ticked = 0                          | <b>Q17b_1_18_1</b><br>Ticked = 1<br>Not ticked = 0                          | <b>Q17b_2_18</b><br>1: under supervision<br>2: shared responsibility<br>3: full autonomy                          |
| collegial mentoring                                                                                                                                        | <b>Q17b_3_19_1</b><br>Ticked = 1<br>Not ticked = 0                          | <b>Q17b_1_19_1</b><br>Ticked = 1<br>Not ticked = 0                          | <b>Q17b_2_19</b><br>1: under supervision<br>2: shared responsibility<br>3: full autonomy                          |
| other task within medication safety management:                                                                                                            | <b>Q17b_3_20_1</b><br>Ticked = 1<br>Not ticked = 0<br><b>Q17b_3_20_TEXT</b> | <b>Q17b_1_20_1</b><br>Ticked = 1<br>Not ticked = 0<br><b>Q17b_1_20_TEXT</b> | <b>Q17b_2_20</b><br>1: under supervision<br>2: shared responsibility<br>3: full autonomy<br><b>Q17b_2_20_TEXT</b> |

**Q18b/ Responsibility 7: (transition of) care coordination.**

|  |                                                                           |                                                                                     |                                                                                                                      |
|--|---------------------------------------------------------------------------|-------------------------------------------------------------------------------------|----------------------------------------------------------------------------------------------------------------------|
|  | <b>Task <u>not</u> relevant</b> within (transition of) care coordination. | <b>Task <u>not</u> allowed</b> for nurses within (transition of) care coordination. | <b>Task <u>allowed</u></b> for nurses within (transition of) care coordination. Specify the level of responsibility. |
|--|---------------------------------------------------------------------------|-------------------------------------------------------------------------------------|----------------------------------------------------------------------------------------------------------------------|

|                                                                                    |                                                    |                                                    |                                                                                          |
|------------------------------------------------------------------------------------|----------------------------------------------------|----------------------------------------------------|------------------------------------------------------------------------------------------|
| observation, documentation, registration, report                                   | <b>Q18b_3_1_1</b><br>Ticked = 1<br>Not ticked = 0  | <b>Q18b_1_1_1</b><br>Ticked = 1<br>Not ticked = 0  | <b>Q18b_2_1</b><br>1: under supervision<br>2: shared responsibility<br>3: full autonomy  |
| assessing patients competences                                                     | <b>Q18b_3_2_1</b><br>Ticked = 1<br>Not ticked = 0  | <b>Q18b_1_2_1</b><br>Ticked = 1<br>Not ticked = 0  | <b>Q18b_2_2</b><br>1: under supervision<br>2: shared responsibility<br>3: full autonomy  |
| assessment and addressing patient/family needs                                     | <b>Q18b_3_3_1</b><br>Ticked = 1<br>Not ticked = 0  | <b>Q18b_1_3_1</b><br>Ticked = 1<br>Not ticked = 0  | <b>Q18b_2_3</b><br>1: under supervision<br>2: shared responsibility<br>3: full autonomy  |
| recognising & preventing risks / complications / medication errors                 | <b>Q18b_3_4_1</b><br>Ticked = 1<br>Not ticked = 0  | <b>Q18b_1_4_1</b><br>Ticked = 1<br>Not ticked = 0  | <b>Q18b_2_4</b><br>1: under supervision<br>2: shared responsibility<br>3: full autonomy  |
| identification, reporting and addressing contra-indications, drug related problems | <b>Q18b_3_5_1</b><br>Ticked = 1<br>Not ticked = 0  | <b>Q18b_1_5_1</b><br>Ticked = 1<br>Not ticked = 0  | <b>Q18b_2_5</b><br>1: under supervision<br>2: shared responsibility<br>3: full autonomy  |
| follow-up                                                                          | <b>Q18b_3_6_1</b><br>Ticked = 1<br>Not ticked = 0  | <b>Q18b_1_6_1</b><br>Ticked = 1<br>Not ticked = 0  | <b>Q18b_2_6</b><br>1: under supervision<br>2: shared responsibility<br>3: full autonomy  |
| evidence based practice                                                            | <b>Q18b_3_7_1</b><br>Ticked = 1<br>Not ticked = 0  | <b>Q18b_1_7_1</b><br>Ticked = 1<br>Not ticked = 0  | <b>Q18b_2_7</b><br>1: under supervision<br>2: shared responsibility<br>3: full autonomy  |
| decision making                                                                    | <b>Q18b_3_8_1</b><br>Ticked = 1<br>Not ticked = 0  | <b>Q18b_1_8_1</b><br>Ticked = 1<br>Not ticked = 0  | <b>Q18b_2_8</b><br>1: under supervision<br>2: shared responsibility<br>3: full autonomy  |
| communication /discussion with patient/family                                      | <b>Q18b_3_9_1</b><br>Ticked = 1<br>Not ticked = 0  | <b>Q18b_1_9_1</b><br>Ticked = 1<br>Not ticked = 0  | <b>Q18b_2_9</b><br>1: under supervision<br>2: shared responsibility<br>3: full autonomy  |
| Inter / intraprofessional referrals                                                | <b>Q18b_3_10_1</b><br>Ticked = 1<br>Not ticked = 0 | <b>Q18b_1_10_1</b><br>Ticked = 1<br>Not ticked = 0 | <b>Q18b_2_10</b><br>1: under supervision<br>2: shared responsibility<br>3: full autonomy |
| facilitation of medication management                                              | <b>Q18b_3_12_1</b><br>Ticked = 1<br>Not ticked = 0 | <b>Q18b_1_12_1</b><br>Ticked = 1<br>Not ticked = 0 | <b>Q18b_2_12</b><br>1: under supervision<br>2: shared responsibility<br>3: full autonomy |
| selfcare support and therapeutic education                                         | <b>Q18b_3_15_1</b><br>Ticked = 1<br>Not ticked = 0 | <b>Q18b_1_15_1</b><br>Ticked = 1<br>Not ticked = 0 | <b>Q18b_2_15</b><br>1: under supervision<br>2: shared responsibility<br>3: full autonomy |
| advice (patient or other healthcare professional)                                  | <b>Q18b_3_16_1</b>                                 | <b>Q18b_1_16_1</b>                                 | <b>Q18b_2_16</b><br>1: under supervision                                                 |

|                                                                                                                                                                     |                                                                             |                                                                             |                                                                                                                   |
|---------------------------------------------------------------------------------------------------------------------------------------------------------------------|-----------------------------------------------------------------------------|-----------------------------------------------------------------------------|-------------------------------------------------------------------------------------------------------------------|
|                                                                                                                                                                     | Ticked = 1<br>Not ticked = 0                                                | Ticked = 1<br>Not ticked = 0                                                | 2: shared responsibility<br>3: full autonomy                                                                      |
| discharge planning, transition of care planning                                                                                                                     | <b>Q18b_3_17_1</b><br>Ticked = 1<br>Not ticked = 0                          | <b>Q18b_1_17_1</b><br>Ticked = 1<br>Not ticked = 0                          | <b>Q18b_2_17</b><br>1: under supervision<br>2: shared responsibility<br>3: full autonomy                          |
| transitional care communication, inter /<br>intraprofessional collaboration / communication<br>including reporting, advising, informing, alerting<br>and discussing | <b>Q18b_3_18_1</b><br>Ticked = 1<br>Not ticked = 0                          | <b>Q18b_1_18_1</b><br>Ticked = 1<br>Not ticked = 0                          | <b>Q18b_2_18</b><br>1: under supervision<br>2: shared responsibility<br>3: full autonomy                          |
| collegial mentoring                                                                                                                                                 | <b>Q18b_3_19_1</b><br>Ticked = 1<br>Not ticked = 0                          | <b>Q18b_1_19_1</b><br>Ticked = 1<br>Not ticked = 0                          | <b>Q18b_2_19</b><br>1: under supervision<br>2: shared responsibility<br>3: full autonomy                          |
| other task within (transition of) care coordination:                                                                                                                | <b>Q18b_3_20_1</b><br>Ticked = 1<br>Not ticked = 0<br><b>Q18b_3_20_TEXT</b> | <b>Q18b_1_20_1</b><br>Ticked = 1<br>Not ticked = 0<br><b>Q18b_1_20_TEXT</b> | <b>Q18b_2_20</b><br>1: under supervision<br>2: shared responsibility<br>3: full autonomy<br><b>Q18b_2_20_TEXT</b> |

Q20/

In your current context, on balance, are the following factors **barriers or enablers** of nurses' roles in interprofessional pharmaceutical care? Indicate your opinion on a scale from -5 to +5 (-5 = a great barrier, 0 = no influence on nurses' responsibilities or tasks, +5 = a great enabler).

|                                                                       | -5 | -4 | -3 | -2 | -1 | 0 | 1             | 2 | 3 | 4 | 5 |
|-----------------------------------------------------------------------|----|----|----|----|----|---|---------------|---|---|---|---|
| Level of emergency                                                    |    |    |    |    |    |   | <b>Q20_1</b>  |   |   |   |   |
| Level of nurse education                                              |    |    |    |    |    |   | <b>Q20_2</b>  |   |   |   |   |
| Quality of nurse education                                            |    |    |    |    |    |   | <b>Q20_3</b>  |   |   |   |   |
| Interprofessional education                                           |    |    |    |    |    |   | <b>Q20_4</b>  |   |   |   |   |
| Adequate reimbursement                                                |    |    |    |    |    |   | <b>Q20_5</b>  |   |   |   |   |
| Clarity of interprofessional team members' roles                      |    |    |    |    |    |   | <b>Q20_6</b>  |   |   |   |   |
| Availability of interprofessional team members                        |    |    |    |    |    |   | <b>Q20_7</b>  |   |   |   |   |
| Collaborative approach between nurses,<br>pharmacists and prescribers |    |    |    |    |    |   | <b>Q20_8</b>  |   |   |   |   |
| Workload/time to care                                                 |    |    |    |    |    |   | <b>Q20_9</b>  |   |   |   |   |
| Adequate nurse to patient ratio                                       |    |    |    |    |    |   | <b>Q20_10</b> |   |   |   |   |
| Shared digital / electronic patient files and records                 |    |    |    |    |    |   | <b>Q20_11</b> |   |   |   |   |
| Legal framework in your country                                       |    |    |    |    |    |   | <b>Q20_12</b> |   |   |   |   |

|                                                                                    |        |
|------------------------------------------------------------------------------------|--------|
| (Self-)confidence of nurses                                                        | Q20_13 |
| Readiness of healthcare workers and patients to accept nurse prescribing           | Q20_14 |
| Open, blame-free safety culture                                                    | Q20_15 |
| Implementation strategy for nurse prescribing                                      | Q20_16 |
| Healthcare setting                                                                 | Q20_17 |
| Epidemiological context (e.g. demographics, patient needs, professional needs,...) | Q20_18 |
| Ethical context (e.g. norms, values,...)                                           | Q20_19 |
| Political context                                                                  | Q20_20 |
