# Supplementary material for: The NUPHAC-EU Framework for Nurses’ Role in Interprofessional Pharmaceutical Care: Cross-Sectional Evaluation in Europe
Source: MDPI journal article supplement (doi:10.3390/ijerph18157862), 2021-07-25
Supplement: s1 [file s1]

**Supplementary Table S1:** Percentages of healthcare professionals considering 26 tasks in seven pharmaceutical care domains as nurses' tasks in order to obtain best quality of care and patient outcomes, split up for 4 EQF\* levels of nurse education.

| <b>PHARMACEUTICAL CARE DOMAIN 1: MANAGEMENT OF THERAPEUTIC AND ADVERSE EFFECTS OF MEDICINES (n=731)</b>                |                                                                            |                                                                      |                                                          |                                                         |                                                         |                                                       |
|------------------------------------------------------------------------------------------------------------------------|----------------------------------------------------------------------------|----------------------------------------------------------------------|----------------------------------------------------------|---------------------------------------------------------|---------------------------------------------------------|-------------------------------------------------------|
| Task within 'management of therapeutic and adverse effects of medicines'                                               | Degree of responsibility for nurses performing this task                   | All nurses (no distinction between levels of education) <sup>a</sup> | level 5 nurses                                           | level 6 nurses                                          | level 7 nurses                                          | level 8 nurses                                        |
|                                                                                                                        |                                                                            | % (n)                                                                | % (n)                                                    | % (n)                                                   | % (n)                                                   | % (n)                                                 |
| observation, documentation, registration, reporting                                                                    | not allowed<br>under supervision<br>shared responsibility<br>full autonomy | 3.6 (28)<br>19.4 (149)<br>31.8 (245)<br><b>45.2</b> (348)            | 1.4 (5)<br>11.9 (43)<br>29.6 (107)<br><b>57.1</b> (206)  | 0.3 (1)<br>11.4 (42)<br>28.8 (106)<br><b>59.5</b> (219) | 0 (0)<br>10.1 (37)<br>28.8 (106)<br><b>61.1</b> (225)   | 0 (0)<br>10.0 (36)<br>28.3 (102)<br><b>61.8</b> (223) |
| assessing patients' competences                                                                                        | not allowed<br>under supervision<br>shared responsibility<br>full autonomy | 5.1 (38)<br>17.5 (131)<br>36.1 (240)<br><b>41.2</b> (308)            | 0.9 (3)<br>9.2 (32)<br>38.0 (132)<br><b>51.9</b> (180)   | 0 (0)<br>8.2 (29)<br>35.5 (126)<br><b>56.3</b> (200)    | 0 (0)<br>6.2 (22)<br>37.9 (134)<br><b>55.9</b> (198)    | 0 (0)<br>6.3 (22)<br>35.4 (123)<br><b>58.2</b> (202)  |
| assessment and addressing patient/family needs                                                                         | not allowed<br>under supervision<br>shared responsibility<br>full autonomy | 4.2 (31)<br>16.8 (124)<br><b>39.7</b> (293)<br>39.3 (290)            | 1.1 (4)<br>10.9 (328)<br>40.9 (143)<br><b>47.1</b> (165) | 0 (0)<br>10.1 (36)<br>38.3 (136)<br><b>51.5</b> (183)   | 0 (0)<br>7.9 (28)<br>40.3 (143)<br><b>51.8</b> (184)    | 0 (0)<br>7.7 (27)<br>28.7 (135)<br><b>53.6</b> (187)  |
| recognising & preventing risks / complications / medication errors                                                     | not allowed<br>under supervision<br>shared responsibility<br>full autonomy | 5.4 (40)<br>21.5 (160)<br><b>46.3</b> (345)<br>16.8 (200)            | 2.0 (7)<br>15.5 (54)<br><b>45.4</b> (158)<br>37.1 (129)  | 0 (0)<br>14.9 (53)<br><b>46.1</b> (164)<br>39.0 (139)   | 0 (0)<br>11.4 (40)<br><b>45.7</b> (161)<br>42.9 (151)   | 0 (0)<br>11.2 (39)<br>43.8 (153)<br><b>45.0</b> (157) |
| identification, reporting and addressing contra-indications to administration, identification of drug related problems | not allowed<br>under supervision<br>shared responsibility<br>full autonomy | 10.6 (79)<br>23.7 (177)<br><b>47.6</b> (356)<br>18.2 (136)           | 2.7 (9)<br>20.6 (69)<br><b>49.6</b> (166)<br>27.2 (91)   | 0.9 (3)<br>17.1 (59)<br>52.2 (180)<br>29.9 (103)        | 0 (0)<br>15.2 (52)<br><b>52.8</b> (180)<br>32.0 (109)   | 0 (0)<br>14.4 (48)<br><b>51.2</b> (171)<br>34.4 (115) |
| follow-up                                                                                                              | not allowed<br>under supervision<br>shared responsibility<br>full autonomy | 7.5 (56)<br>19.7 (147)<br><b>41.5</b> (310)<br>31.3 (234)            | 2.1 (7)<br>12.8 (43)<br><b>44.2</b> (149)<br>40.9 (138)  | 0.6 (2)<br>11.0 (38)<br><b>45.4</b> (157)<br>43.1 (149) | 0.3 (1)<br>9.4 (32)<br><b>45.5</b> (155)<br>44.9 (153)  | 0 (0)<br>8.9 (30)<br>43.8 (147)<br><b>47.3</b> (159)  |
| adhering to evidence based practice as described in clinical guidelines                                                | not allowed<br>under supervision<br>shared responsibility<br>full autonomy | 8.4 (60)<br>23.9 (171)<br><b>38.5</b> (275)<br>29.1 (208)            | 5.3 (17)<br>18.0 (58)<br><b>40.7</b> (131)<br>36.0 (116) | 2.1 (7)<br>15.9 (53)<br><b>42.6</b> (142)<br>39.3 (131) | 0.6 (2)<br>12.4 (41)<br>42.1 (139)<br><b>44.8</b> (148) | 0 (0)<br>11.7 (38)<br>40.7 (132)<br><b>47.5</b> (154) |
| decision making                                                                                                        | not allowed<br>under supervision                                           | 17.9 (133)<br>27.4 (203)                                             | 4.3 (13)<br>23.6 (71)                                    | 0.6 (2)<br>22.8 (72)                                    | 0.3 (1)<br>19.8 (62)                                    | 0.3 (1)<br>19.2 (59)                                  |

|                                                                                                                                                          | shared responsibility                                    | <b>40.4</b> (299)                                       | <b>52.2</b> (157) | <b>52.5</b> (166) | <b>52.7</b> (165) | <b>51.6</b> (159) |
|----------------------------------------------------------------------------------------------------------------------------------------------------------|----------------------------------------------------------|---------------------------------------------------------|-------------------|-------------------|-------------------|-------------------|
|                                                                                                                                                          | full autonomy                                            | 14.3 (106)                                              | 19.9 (60)         | 24.1 (76)         | 27.2 (85)         | 28.9 (89)         |
| communication /discussion with patient/family                                                                                                            | not allowed                                              | 7.6 (58)                                                | 2.0 (7)           | 0 (0)             | 0 (0)             | 0 (0)             |
|                                                                                                                                                          | under supervision                                        | 19.6 (149)                                              | 13.6 (47)         | 12.4 (44)         | 10.3 (36)         | 9.5 (33)          |
|                                                                                                                                                          | shared responsibility                                    | <b>40.0</b> (304)                                       | <b>42.5</b> (147) | 42.3 (150)        | 42.7 (150)        | 43.4 (151)        |
|                                                                                                                                                          | full autonomy                                            | 32.8 (249)                                              | 41.9 (145)        | 45.4 (161)        | <b>47.0</b> (165) | <b>47.1</b> (164) |
| inter / intraprofessional referrals                                                                                                                      | not allowed                                              | 14.3 (104)                                              | 4.5 (14)          | 2.8 (9)           | 0.6 (2)           | 0 (0)             |
|                                                                                                                                                          | under supervision                                        | 23.9 (174)                                              | 21.0 (65)         | 19.4 (62)         | 16.8 (53)         | 16.3 (50)         |
|                                                                                                                                                          | shared responsibility                                    | <b>43.5</b> (316)                                       | <b>47.7</b> (148) | <b>48.4</b> (155) | 49.8 (157)        | <b>49.5</b> (152) |
|                                                                                                                                                          | full autonomy                                            | 18.3 (133)                                              | 26.8 (83)         | 29.4 (94)         | 32.7 (103)        | 34.2 (105)        |
| facilitation of medication management                                                                                                                    | not allowed                                              | 21.7 (159)                                              | 4.7 (15)          | 1.8 (6)           | 0 (0)             | 0 (0)             |
|                                                                                                                                                          | under supervision                                        | 20.5 (150)                                              | 24.8 (79)         | 21.4 (70)         | 18.9 (61)         | 18.7 (59)         |
|                                                                                                                                                          | shared responsibility                                    | <b>36.5</b> (267)                                       | <b>46.5</b> (148) | <b>48.6</b> (159) | <b>49.8</b> (161) | <b>47.9</b> (151) |
|                                                                                                                                                          | full autonomy                                            | 21.3 (156)                                              | 23.9 (76)         | 28.1 (92)         | 31.3 (101)        | 33.3 (105)        |
| self-care support and education of patients                                                                                                              | not allowed                                              | 11.0 (82)                                               | 1.5 (5)           | 0.3 (1)           | 0 (0)             | 0 (0)             |
|                                                                                                                                                          | under supervision                                        | 15.9 (118)                                              | 12.8 (43)         | 11.2 (39)         | 10.2 (35)         | 9.7 (33)          |
|                                                                                                                                                          | shared responsibility                                    | 35.4 (263)                                              | 42.4 (143)        | 41.7 (145)        | 39.8 (137)        | 38.4 (131)        |
|                                                                                                                                                          | full autonomy                                            | <b>37.7</b> (280)                                       | <b>43.3</b> (146) | <b>46.8</b> (163) | <b>50.0</b> (172) | <b>51.9</b> (177) |
| advice (to patient or other healthcare professional)                                                                                                     | not allowed                                              | 9.0 (64)                                                | 4.4 (14)          | 1.2 (4)           | 0.3 (1)           | 0.3 (1)           |
|                                                                                                                                                          | under supervision                                        | 22.4 (160)                                              | 17.8 (57)         | 15.4 (51)         | 13.0 (42)         | 11.5 (37)         |
|                                                                                                                                                          | shared responsibility                                    | <b>42.4</b> (302)                                       | <b>44.1</b> (141) | <b>47.0</b> (156) | <b>46.3</b> (150) | <b>45.2</b> (145) |
|                                                                                                                                                          | full autonomy                                            | 26.2 (187)                                              | 33.8 (108)        | 36.4 (121)        | 40.4 (131)        | 43.0 (138)        |
| transitional care communication, inter / intraprofessional collaboration / communication including reporting, advising, informing, alerting & discussing | not allowed                                              | 10.4 (75)                                               | 4.6 (15)          | 0.6 (2)           | 0 (0)             | 0 (0)             |
|                                                                                                                                                          | under supervision                                        | 21.1 (153)                                              | 18.2 (60)         | 17.2 (58)         | 13.5 (45)         | 12.7 (42)         |
|                                                                                                                                                          | shared responsibility                                    | <b>44.1</b> (319)                                       | <b>44.4</b> (146) | <b>45.1</b> (152) | <b>47.6</b> (159) | <b>44.7</b> (148) |
|                                                                                                                                                          | full autonomy                                            | 24.4 (177)                                              | 32.8 (108)        | 37.1 (125)        | 38.9 (130)        | 42.6 (141)        |
| mentoring colleagues                                                                                                                                     | not allowed                                              | 7.7 (53)                                                | 6.7 (21)          | 1.8 (6)           | 0.3 (1)           | 0 (0)             |
|                                                                                                                                                          | under supervision                                        | 21.5 (148)                                              | 15.9 (50)         | 16.1 (53)         | 12.4 (40)         | 11.7 (37)         |
|                                                                                                                                                          | shared responsibility                                    | <b>38.9</b> (268)                                       | <b>43.3</b> (136) | <b>43.9</b> (145) | 41.6 (134)        | 40.4 (128)        |
|                                                                                                                                                          | full autonomy                                            | 31.9 (220)                                              | 34.1 (107)        | 38.2 (126)        | <b>45.7</b> (147) | <b>47.9</b> (152) |
| <b>PHARMACEUTICAL CARE DOMAIN 2: MANAGEMENT OF MEDICINES ADHERENCE (n=796)</b>                                                                           |                                                          |                                                         |                   |                   |                   |                   |
| Task within 'management of medicines adherence'                                                                                                          | Degree of responsibility for nurses performing this task | All nurses (no distinction between levels of education) | level 5 nurses    | level 6 nurses    | level 7 nurses    | level 8 nurses    |
|                                                                                                                                                          |                                                          | % (n)                                                   | % (n)             | % (n)             | % (n)             | % (n)             |
| observation, documentation, registration, report                                                                                                         | not allowed                                              | 4.0 (32)                                                | 0.3 (1)           | 0 (41)            | 0.3 (1)           | 0 (0)             |
|                                                                                                                                                          | under supervision                                        | 15.1 (120)                                              | 12.4 (48)         | 10.5 (119)        | 9.3 (36)          | 9.3 (36)          |
|                                                                                                                                                          | shared responsibility                                    | 35.8 (285)                                              | 30.3 (117)        | 30.5 (230)        | 30.0 (116)        | 29.5 (114)        |
|                                                                                                                                                          | full autonomy                                            | <b>45.1</b> (359)                                       | <b>57.0</b> (220) | <b>59.0</b> (390) | <b>60.5</b> (234) | <b>61.1</b> (236) |

|                                                                                    |                                                                            |                                                             |                                                          |                                                         |                                                         |                                                         |
|------------------------------------------------------------------------------------|----------------------------------------------------------------------------|-------------------------------------------------------------|----------------------------------------------------------|---------------------------------------------------------|---------------------------------------------------------|---------------------------------------------------------|
| assessing patients competences                                                     | not allowed<br>under supervision<br>shared responsibility<br>full autonomy | 4.3 (33)<br>15.6 (119)<br>38.3 (293)<br><b>41.8</b> (320)   | 0.8 (3)<br>11.3 (41)<br>36.3 (132)<br><b>51.6</b> (188)  | 0 (0)<br>10.5 (39)<br>37.0 (137)<br><b>52.4</b> (194)   | 0.3 (1)<br>8.7 (32)<br>37.2 (137)<br><b>53.8</b> (198)  | 0 (0)<br>9.0 (33)<br>35.3 (129)<br><b>55.6</b> (203)    |
| assessment and addressing patient/family needs                                     | not allowed<br>under supervision<br>shared responsibility<br>full autonomy | 3.0 (23)<br>13.2 (101)<br><b>45.6</b> (349)<br>38.2 (292)   | 1.4 (5)<br>98 (36)<br>41.6 (153)<br><b>47.3</b> (174)    | 0 (0)<br>9.7 (36)<br>41.6 (155)<br><b>48.8</b> (182)    | 0.3 (1)<br>7.3 (27)<br>43.3 (161)<br><b>49.2</b> (183)  | 0 (0)<br>7.0 (26)<br>41.6 (154)<br><b>51.4</b> (190)    |
| recognising & preventing risks / complications / medication errors                 | not allowed<br>under supervision<br>shared responsibility<br>full autonomy | 4.8 (37)<br>15.1 (116)<br><b>52.2</b> (401)<br>27.9 (214)   | 1.6 (6)<br>14.3 (53)<br><b>46.2</b> (171)<br>37.8 (140)  | 0.3 (1)<br>13.2 (50)<br><b>45.6</b> (173)<br>40.9 (155) | 0.5 (2)<br>10.7 (40)<br><b>47.2</b> (176)<br>41.6 (155) | 0.3 (1)<br>10.3 (38)<br><b>46.2</b> (171)<br>43.2 (160) |
| identification, reporting and addressing contra-indications, drug related problems | not allowed<br>under supervision<br>shared responsibility<br>full autonomy | 8.6 (65)<br>18.5 (140)<br><b>53.5</b> (404)<br>19.3 (146)   | 3.8 (13)<br>17.9 (62)<br><b>50.0</b> (173)<br>28.3 (98)  | 0.8 (3)<br>17.3 (62)<br><b>50.3</b> (180)<br>31.6 (113) | 0.6 (2)<br>15.1 (53)<br><b>50.1</b> (176)<br>34.2 (120) | 0.3 (1)<br>14.3 (50)<br><b>50.3</b> (176)<br>35.1 (123) |
| follow-up                                                                          | not allowed<br>under supervision<br>shared responsibility<br>full autonomy | 5.8 (44)<br>16.5 (125)<br><b>44.4</b> (337)<br>33.3 (253)   | 2.2 (8)<br>15.3 (55)<br>39.0 (140)<br><b>43.5</b> (156)  | 0.8 (3)<br>13.2 (48)<br>40.3 (147)<br><b>45.8</b> (167) | 0.3 (1)<br>11.6 (42)<br>40.5 (147)<br><b>47.7</b> (173) | 0 (0)<br>10.4 (37)<br>39.8 (142)<br><b>49.9</b> (178)   |
| evidence based practice                                                            | not allowed<br>under supervision<br>shared responsibility<br>full autonomy | 7.7 (55)<br>16.1 (115)<br><b>45.2</b> (323)<br>31.0 (221)   | 3.6 (12)<br>17.1 (57)<br><b>41.6</b> (139)<br>37.7 (126) | 2.0 (7)<br>15.0 (52)<br><b>43.1</b> (149)<br>39.9 (38)  | 0.3 (1)<br>12.9 (44)<br>41.6 (142)<br><b>45.2</b> (154) | 0 (0)<br>12.1 (41)<br>40.5 (137)<br><b>47.3</b> (160)   |
| decision making                                                                    | not allowed<br>under supervision<br>shared responsibility<br>full autonomy | 15.0 (109)<br>20.3 (148)<br><b>47.0</b> (342)<br>17.7 (129) | 6.9 (22)<br>20.2 (65)<br><b>48.3</b> (155)<br>24.6 (79)  | 3.0 (10)<br>21.6 (72)<br><b>47.0</b> (157)<br>28.4 (95) | 1.8 (6)<br>18.5 (61)<br><b>50.0</b> (165)<br>29.7 (98)  | 0.6 (2)<br>17.5 (57)<br><b>50.6</b> (165)<br>31.3 (102) |
| communication /discussion with patient/family                                      | not allowed<br>under supervision<br>shared responsibility<br>full autonomy | 5.8 (44)<br>15.2 (116)<br><b>45.9</b> (351)<br>33.2 (254)   | 1.9 (7)<br>14.4 (52)<br>40.8 (147)<br><b>42.8</b> (154)  | 0 (0)<br>13.4 (50)<br>41.8 (156)<br><b>44.8</b> (167)   | 0.3 (1)<br>10.5 (39)<br>41.4 (153)<br><b>47.8</b> (177) | 0 (0)<br>9.6 (35)<br>41.0 (150)<br><b>49.5</b> (181)    |
| detection of non-adherence, drug abuse/misuse                                      | not allowed<br>under supervision<br>shared responsibility<br>full autonomy | 4.6 (35)<br>14.1 (108)<br><b>46.4</b> (356)<br>34.9 (268)   | 1.6 (6)<br>13.5 (49)<br><b>43.7</b> (159)<br>41.2 (150)  | 0 (0)<br>10.9 (41)<br><b>47.1</b> (177)<br>42.0 (158)   | 0.3 (1)<br>9.9 (37)<br><b>45.3</b> (169)<br>44.5 (166)  | 0 (0)<br>9.7 (36)<br>43.8 (163)<br><b>46.5</b> (173)    |
| motivational interviewing                                                          | not allowed<br>under supervision<br>shared responsibility<br>full autonomy | 4.2 (31)<br>13.9 (103)<br><b>42.4</b> (313)<br>39.5 (292)   | 2.5 (9)<br>13.7 (50)<br><b>43.2</b> (158)<br>40.7 (149)  | 0.3 (1)<br>12.3 (47)<br><b>46.2</b> (177)<br>41.3 (158) | 0.3 (1)<br>10.0 (38)<br>44.5 (169)<br><b>45.3</b> (172) | 0 (0)<br>9.3 (35)<br>44.2 (167)<br><b>46.6</b> (176)    |

| Inter / intraprofessional referrals                                                                                                                        | not allowed<br>under supervision<br>shared responsibility<br>full autonomy | 11.4 (82)<br>18.9 (136)<br><b>49.6</b> (356)<br>20.1 (144)  | 6.5 (21)<br>20.5 (66)<br><b>47.2</b> (152)<br>25.8 (83)  | 1.2 (4)<br>21.6 (72)<br><b>49.7</b> (166)<br>27.5 (92)  | 0.3 (1)<br>19.3 (64)<br><b>49.5</b> (164)<br>30.8 (102) | 0 (0)<br>18.3 (60)<br><b>48.5</b> (159)<br>33.1 (109)   |
|------------------------------------------------------------------------------------------------------------------------------------------------------------|----------------------------------------------------------------------------|-------------------------------------------------------------|----------------------------------------------------------|---------------------------------------------------------|---------------------------------------------------------|---------------------------------------------------------|
| facilitation of medication management                                                                                                                      | not allowed<br>under supervision<br>shared responsibility<br>full autonomy | 18.2 (131)<br>16.1 (116)<br><b>39.0</b> (281)<br>26.7 (192) | 3.0 (10)<br>20.1 (66)<br>16.5 (153)<br><b>30.4</b> (100) | 1.5 (5)<br>19.0 (64)<br><b>47.6</b> (160)<br>31.8 (107) | 0.6 (2)<br>15.7 (53)<br><b>49.0</b> (165)<br>34.7 (117) | 0.3 (1)<br>15.3 (51)<br><b>46.1</b> (154)<br>38.3 (128) |
| selfcare support and therapeutic education                                                                                                                 | not allowed<br>under supervision<br>shared responsibility<br>full autonomy | 4.0 (30)<br>13.4 (101)<br><b>41.1</b> (310)<br>41.6 (314)   | 2.2 (8)<br>12.9 (47)<br>36.9 (134)<br><b>47.9</b> (174)  | 0.5 (2)<br>12.1 (45)<br>37.8 (141)<br><b>49.6</b> (185) | 0.3 (1)<br>10.2 (38)<br>37.9 (141)<br><b>51.6</b> (192) | 0 (0)<br>9.2 (34)<br>38.1 (141)<br><b>52.7</b> (195)    |
| advice (patient or other healthcare professional)                                                                                                          | not allowed<br>under supervision<br>shared responsibility<br>full autonomy | 7.0 (51)<br>16.6 (122)<br><b>45.7</b> (335)<br>30.7 (225)   | 3.5 (12)<br>17.2 (59)<br><b>40.4</b> (139)<br>39.0 (134) | 0.8 (3)<br>15.0 (53)<br><b>43.8</b> (155)<br>40.4 (143) | 0.6 (2)<br>13.6 (48)<br>41.5 (147)<br><b>44.4</b> (157) | 0 (0)<br>12.0 (42)<br>41.4 (145)<br><b>46.6</b> (163)   |
| transitional care communication, inter / intraprofessional collaboration / communication including reporting, advising, informing, alerting and discussing | not allowed<br>under supervision<br>shared responsibility<br>full autonomy | 7.1 (53)<br>15.9 (118)<br><b>51.5</b> (383)<br>25.4 (189)   | 2.9 (10)<br>14.7 (50)<br><b>48.4</b> (164)<br>33.9 (115) | 0.9 (3)<br>15.5 (54)<br><b>47.9</b> (167)<br>35.8 (125) | 0.3 (1)<br>13.7 (48)<br><b>48.1</b> (169)<br>37.9 (133) | 0 (0)<br>12.1 (42)<br><b>47.4</b> (165)<br>40.5 (141)   |
| mentoring colleagues                                                                                                                                       | not allowed<br>under supervision<br>shared responsibility<br>full autonomy | 7.3 (52)<br>16.8 (119)<br><b>44.6</b> (316)<br>31.2 (221)   | 5.8 (19)<br>17.2 (56)<br><b>39.7</b> (129)<br>37.2 (121) | 1.2 (4)<br>16.5 (55)<br><b>42.9</b> (143)<br>39.3 (131) | 0.6 (2)<br>13.6 (46)<br>41.2 (139)<br><b>44.5</b> (150) | 0 (0)<br>12.5 (42)<br>39.4 (132)<br><b>48.1</b> (161)   |
| <b>PHARMACEUTICAL CARE DOMAIN 3: MANAGEMENT OF PATIENT MEDICATION SELF-MANAGEMENT (n=726)</b>                                                              |                                                                            |                                                             |                                                          |                                                         |                                                         |                                                         |
| Task within 'management of patient medication self-management'                                                                                             | Degree of responsibility for nurses performing this task                   | All nurses (no distinction between levels of education)     | level 5 nurses                                           | level 6 nurses                                          | level 7 nurses                                          | level 8 nurses                                          |
|                                                                                                                                                            |                                                                            | % (n)                                                       | % (n)                                                    | % (n)                                                   | % (n)                                                   | % (n)                                                   |
| observation, documentation, registration, report                                                                                                           | not allowed<br>under supervision<br>shared responsibility<br>full autonomy | 3.6 (24)<br>9.2 (62)<br>33.5 (226)<br><b>53.8</b> (363)     | 0.3 (1)<br>12.3 (46)<br>32.9 (123)<br><b>54.5</b> (204)  | 0 (0)<br>11.2 (42)<br>34.1 (128)<br><b>54.7</b> (205)   | 0.3 (1)<br>10.8 (40)<br>33.3 (124)<br><b>55.6</b> (207) | 0 (0)<br>10.8 (40)<br>32.5 (120)<br><b>56.6</b> (209)   |
| assessing patients competences                                                                                                                             | not allowed<br>under supervision<br>shared responsibility<br>full autonomy | 3.1 (23)<br>8.8 (66)<br>43.9 (330)<br><b>44.3</b> (333)     | 0.6 (2)<br>12.1 (44)<br>37.5 (136)<br><b>49.9</b> (181)  | 0 (0)<br>9.3 (34)<br>38.3 (140)<br><b>52.5</b> (192)    | 0.3 (1)<br>8.8 (32)<br>37.0 (134)<br><b>53.9</b> (195)  | 0 (0)<br>8.7 (31)<br>36.5 (130)<br><b>54.8</b> (15)     |
| assessment and addressing patient/family needs                                                                                                             | not allowed<br>under supervision                                           | 3.1 (23)<br>7.8 (59)                                        | 0.8 (3)<br>10.3 (37)                                     | 0 (0)<br>9.2 (33)                                       | 0.3 (1)<br>8.5 (30)                                     | 0 (0)<br>8.0 (28)                                       |

|                                                                                        |                                                                            |                                                             |                                                          |                                                         |                                                         |                                                         |
|----------------------------------------------------------------------------------------|----------------------------------------------------------------------------|-------------------------------------------------------------|----------------------------------------------------------|---------------------------------------------------------|---------------------------------------------------------|---------------------------------------------------------|
|                                                                                        | shared responsibility<br>full autonomy                                     | <b>46.8</b> (352)<br>42.3 (318)                             | 39.7 (142)<br><b>49.2</b> (176)                          | 40.3 (145)<br><b>50.6</b> (182)                         | 39.5 (140)<br><b>51.7</b> (183)                         | 39.1 (136)<br><b>52.9</b> (184)                         |
| recognising & preventing risks / complications /<br>medication errors                  | not allowed<br>under supervision<br>shared responsibility<br>full autonomy | 4.3 (32)<br>10.9 (81)<br><b>54.2</b> (404)<br>30.7 (229)    | 1.1 (4)<br>15.2 (55)<br><b>44.2</b> (160)<br>39.5 (143)  | 0.3 (1)<br>12.4 (45)<br><b>45.2</b> (164)<br>42.1 (153) | 0.6 (2)<br>11.2 (40)<br><b>45.3</b> (162)<br>43.0 (154) | 0 (0)<br>11.4 (40)<br><b>44.9</b> (158)<br>43.8 (154)   |
| identification, reporting and addressing contra-<br>indications, drug related problems | not allowed<br>under supervision<br>shared responsibility<br>full autonomy | 7.3 (54)<br>12.4 (92)<br><b>56.1</b> (417)<br>24.2 (180)    | 1.8 (6)<br>15.5 (53)<br><b>49.3</b> (168)<br>33.4 (114)  | 0 (0)<br>14.4 (49)<br><b>50.9</b> (173)<br>34.7 (118)   | 0.6 (2)<br>12.1 (41)<br><b>51.2</b> (173)<br>36.1 (122) | 0.3 (1)<br>12.3 (41)<br><b>49.4</b> (164)<br>38.0 (126) |
| follow-up                                                                              | not allowed<br>under supervision<br>shared responsibility<br>full autonomy | 5.6 (42)<br>10.8 (80)<br><b>49.2</b> (366)<br>34.4 (256)    | 2.6 (9)<br>12.8 (45)<br>41.2 (145)<br><b>43.5</b> (153)  | 0.3 (1)<br>11.6 (41)<br>43.5 (153)<br><b>44.6</b> (157) | 0.6 (2)<br>10.3 (36)<br>43.4 (151)<br><b>45.7</b> (159) | 0.3 (1)<br>10.5 (36)<br>42.3 (145)<br><b>46.9</b> (161) |
| evidence based practice                                                                | not allowed<br>under supervision<br>shared responsibility<br>full autonomy | 7.5 (53)<br>11.7 (83)<br><b>46.3</b> (329)<br>34.5 (245)    | 3.1 (10)<br>18.2 (59)<br>35.5 (115)<br><b>43.2</b> (140) | 0.9 (3)<br>14.4 (47)<br>39.1 (128)<br><b>45.6</b> (149) | 0.3 (1)<br>13.8 (45)<br>36.7 (120)<br><b>49.2</b> (164) | 0 (0)<br>12.8 (41)<br>35.9 (115)<br><b>51.2</b> (164)   |
| decision making                                                                        | not allowed<br>under supervision<br>shared responsibility<br>full autonomy | 14.2 (102)<br>14.9 (107)<br><b>49.4</b> (356)<br>21.5 (155) | 2.3 (7)<br>21.4 (66)<br><b>44.7</b> (138)<br>31.7 (98)   | 1.0 (3)<br>18.8 (59)<br><b>47.3</b> (148)<br>32.9 (103) | 0.3 (1)<br>17.9 (56)<br><b>46.0</b> (144)<br>35.8 (112) | 0 (0)<br>17.0 (52)<br><b>45.9</b> (140)<br>37.0 (113)   |
| communication /discussion with patient/family                                          | not allowed<br>under supervision<br>shared responsibility<br>full autonomy | 5.1 (39)<br>8.4 (64)<br><b>50.7</b> (386)<br>35.7 (272)     | 0.8 (3)<br>11.4 (41)<br>43.7 (157)<br><b>44.0</b> (158)  | 0 (0)<br>10.0 (36)<br>44.9 (162)<br><b>45.2</b> (163)   | 0.6 (2)<br>9.7 (35)<br>43.5 (157)<br><b>46.3</b> (167)  | 0 (0)<br>9.4 (33)<br>42.5 (149)<br><b>48.1</b> (169)    |
| motivational interviewing                                                              | not allowed<br>under supervision<br>shared responsibility<br>full autonomy | 5.5 (41)<br>8.2 (61)<br><b>43.8</b> (327)<br>42.6 (318)     | 1.2 (4)<br>12.8 (44)<br>33.9 (117)<br><b>52.2</b> (180)  | 0.6 (2)<br>10.6 (37)<br>35.7 (125)<br><b>53.1</b> (186) | 0.6 (2)<br>8.6 (30)<br>34.7 (121)<br><b>56.2</b> (196)  | 0.3 (1)<br>9.1 (31)<br>33.8 (115)<br><b>56.8</b> (193)  |
| Inter / intraprofessional referrals                                                    | not allowed<br>under supervision<br>shared responsibility<br>full autonomy | 12.1 (86)<br>12.6 (90)<br><b>51.8</b> (369)<br>23.6 (168)   | 3.3 (10)<br>20.8 (64)<br><b>43.0</b> (132)<br>32.9 (101) | 1.6 (5)<br>18.6 (58)<br><b>44.4</b> (138)<br>35.4 (110) | 1.0 (3)<br>16.3 (51)<br><b>44.9</b> (140)<br>37.8 (118) | 0 (0)<br>16.6 (51)<br><b>44.0</b> (135)<br>39.4 (121)   |
| facilitation of medication management                                                  | not allowed<br>under supervision<br>shared responsibility<br>full autonomy | 13.4 (95)<br>13.4 (95)<br><b>44.9</b> (318)<br>28.3 (201)   | 2.7 (8)<br>17.0 (51)<br><b>47.0</b> (141)<br>33.0 (100)  | 1.0 (3)<br>14.5 (44)<br><b>50.3</b> (153)<br>34.2 (104) | 0.3 (1)<br>13.6 (41)<br><b>48.3</b> (146)<br>37.7 (114) | 0 (0)<br>14.4 (43)<br><b>47.5</b> (142)<br>38.1 (114)   |
| selfcare support and therapeutic education                                             | not allowed<br>under supervision                                           | 4.8 (36)<br>9.3 (70)                                        | 1.4 (5)<br>12.9 (46)                                     | 0.3 (1)<br>10.1 (36)                                    | 0.3 (1)<br>9.4 (33)                                     | 0 (0)<br>9.8 (34)                                       |

|                                                                                                                                                                     | shared responsibility<br>full autonomy                                     | <b>46.9</b> (352)<br>38.9 (292)                               | 40.2 (143)<br><b>45.5</b> (162)                          | 42.5 (152)<br><b>47.2</b> (169)                         | 40.6 (143)<br><b>49.7</b> (175)                         | 40.3 (140)<br><b>49.9</b> (173)                         |
|---------------------------------------------------------------------------------------------------------------------------------------------------------------------|----------------------------------------------------------------------------|---------------------------------------------------------------|----------------------------------------------------------|---------------------------------------------------------|---------------------------------------------------------|---------------------------------------------------------|
| advice (patient or other healthcare professional)                                                                                                                   | not allowed<br>under supervision<br>shared responsibility<br>full autonomy | 9.0 (64)<br>11.5 (82)<br><b>49.0</b> (350)<br>30.6 (219)      | 1.3 (4)<br>17.9 (57)<br><b>41.7</b> (133)<br>39.2 (125)  | 0.3 (1)<br>13.1 (42)<br><b>47.7</b> (153)<br>38.9 (125) | 0.3 (1)<br>12.3 (39)<br><b>44.0</b> (140)<br>43.4 (138) | 0 (0)<br>12.4 (39)<br><b>46.6</b> (136)<br>44.3 (139)   |
| transitional care communication, inter /<br>intraprofessional collaboration / communication<br>including reporting, advising, informing, alerting and<br>discussing | not allowed<br>under supervision<br>shared responsibility<br>full autonomy | 7.2 (53)<br>11.9 (88)<br><b>55.4</b> (410)<br>25.5 (189)      | 1.8 (6)<br>17.0 (57)<br><b>46.1</b> (155)<br>35.1 ( 118) | 0.3 (1)<br>14.5 (49)<br><b>47.8</b> (161)<br>37.4 (126) | 0.3 (1)<br>12.5 (42)<br><b>47.6</b> (160)<br>39.6 (133) | 0 (0)<br>12.6 (42)<br><b>45.9</b> (153)<br>41.4 (138)   |
| mentoring colleagues                                                                                                                                                | not allowed<br>under supervision<br>shared responsibility<br>full autonomy | 8.0 (56)<br>10.3 (72)<br><b>45.7</b> (319)<br>36.0 (251)      | 4.1 (13)<br>15.6 (50)<br>37.5 (120)<br><b>42.8</b> (137) | 0.6 (2)<br>13.0 (42)<br>39.2 (127)<br><b>47.2</b> (153) | 0.6 (2)<br>10.9 (35)<br>36.9 (118)<br><b>51.6</b> (165) | 0.3 (1)<br>11.1 (35)<br>35.1 (111)<br><b>53.5</b> (169) |
| <b>PHARMACEUTICAL CARE DOMAIN 4: MANAGEMENT OF PATIENT EDUCATION AND INFORMATION (n=731)</b>                                                                        |                                                                            |                                                               |                                                          |                                                         |                                                         |                                                         |
| Task within 'management of patient education and<br>information                                                                                                     | Degree of<br>responsibility for<br>nurses performing<br>this task          | All nurses (no<br>distinction between<br>levels of education) | level 5 nurses                                           | level 6 nurses                                          | level 7 nurses                                          | level 8 nurses                                          |
|                                                                                                                                                                     |                                                                            | % (n)                                                         | % (n)                                                    | % (n)                                                   | % (n)                                                   | % (n)                                                   |
| observation, documentation, registration, report                                                                                                                    | not allowed<br>under supervision<br>shared responsibility<br>full autonomy | 4.2 (32)<br>9.8 (75)<br>37.8 (289)<br><b>48.2</b> (369)       | 1.1 (4)<br>11.0 (39)<br>28.8 (102)<br><b>59.0</b> (209)  | 0 (0)<br>9.8 (35)<br>29.3 (105)<br><b>60.9</b> (218)    | 0 (0)<br>9.1 (32)<br>28.8 (101)<br><b>62.1</b> (218)    | 0 (0)<br>9.1 (32)<br>27.8 (98)<br><b>63.1</b> (222)     |
| assessing patients competences                                                                                                                                      | not allowed<br>under supervision<br>shared responsibility<br>full autonomy | 4.8 (36)<br>9.0 (68)<br>42.4 (320)<br><b>43.8</b> (331)       | 0.6 (2)<br>9.3 (32)<br>38.0 (131)<br><b>52.2</b> (180)   | 0 (0)<br>7.2 (25)<br>38.7 (135)<br><b>54.2</b> (189)    | 0 (0)<br>7.0 (24)<br>36.6 (126)<br><b>56.4</b> (194)    | 0 (0)<br>6.7 (23)<br>36.2 (124)<br><b>57.1</b> (196)    |
| assessment and addressing patient/family needs                                                                                                                      | not allowed<br>under supervision<br>shared responsibility<br>full autonomy | 3.7 (28)<br>7.8 (59)<br><b>44.9</b> (338)<br>43.5 (327)       | 0.6 (2)<br>10.3 (36)<br>39.7 (138)<br><b>49.4</b> (172)  | 0 (0)<br>9.3 (33)<br>40.2 (142)<br><b>50.4</b> (178)    | 0 (0)<br>8.9 (31)<br>38.7 (135)<br><b>52.4</b> (183)    | 0 (0)<br>8.1 (28)<br>38.6 (134)<br><b>53.3</b> (185)    |
| follow-up                                                                                                                                                           | not allowed<br>under supervision<br>shared responsibility<br>full autonomy | 5.7 (43)<br>9.4 (71)<br><b>46.7</b> (351)<br>38.2 (287)       | 2.1 (7)<br>11.9 (40)<br>37.7 (127)<br><b>48.4</b> (16)   | 0 (0)<br>11.4 (39)<br>38.7 (132)<br><b>49.9</b> (170)   | 0 (0)<br>9.9 (33)<br>38.2 (128)<br><b>51.9</b> (174)    | 0 (0)<br>8.7 (29)<br>38.3 (128)<br><b>53.0</b> (177)    |
| evidence based practice                                                                                                                                             | not allowed<br>under supervision<br>shared responsibility<br>full autonomy | 7.7 (55)<br>12.0 (85)<br><b>47.5</b> (338)<br>32.8 (233)      | 4.1 (13)<br>15.7 (50)<br><b>40.3</b> (128)<br>39.9 (127) | 0.6 (2)<br>13.7 (45)<br>41.8 (137)<br><b>43.9</b> (144) | 0 (0)<br>13.5 (43)<br>39.2 (125)<br><b>47.3</b> (151)   | 0 (0)<br>11.3 (36)<br>39.6 (126)<br><b>49.1</b> (156)   |

|                                                                                                                                                                     |                                                                            |                                                                      |                                                          |                                                         |                                                         |                                                         |
|---------------------------------------------------------------------------------------------------------------------------------------------------------------------|----------------------------------------------------------------------------|----------------------------------------------------------------------|----------------------------------------------------------|---------------------------------------------------------|---------------------------------------------------------|---------------------------------------------------------|
| decision making                                                                                                                                                     | not allowed<br>under supervision<br>shared responsibility<br>full autonomy | 12.8 (93)<br>15.0 (109)<br><b>49.4</b> (358)<br>22.8 (165)           | 3.3 (10)<br>21.1 (64)<br><b>46.1</b> (140)<br>29.6 (90)  | 0 (0)<br>19.6 (61)<br><b>48.1</b> (150)<br>32.4 (101)   | 0 (0)<br>16.7 (51)<br><b>48.2</b> (147)<br>35.1 (107)   | 0 (0)<br>15.8 (48)<br><b>47.2</b> (143)<br>37.0 (112)   |
| communication /discussion with patient/family                                                                                                                       | not allowed<br>under supervision<br>shared responsibility<br>full autonomy | 5.7 (43)<br>8.7 (66)<br><b>51.1</b> (387)<br>34.5 (261)              | 0.9 (3)<br>12.0 (41)<br>42.6 (146)<br><b>44.6</b> (153)  | 0 (0)<br>10.5 (37)<br>42.2 (149)<br><b>47.3</b> (167)   | 0 (0)<br>8.7 (30)<br>42.9 (147)<br><b>48.4</b> (166)    | 0 (0)<br>8.5 (29)<br>42.0 (144)<br><b>49.6</b> (170)    |
| motivational interviewing                                                                                                                                           | not allowed<br>under supervision<br>shared responsibility<br>full autonomy | 5.9 (44)<br>7.6 (56)<br>43.2 (320)<br><b>43.3</b> (321)              | 1.5 (5)<br>10.3 (35)<br>36.6 (124)<br><b>51.6</b> (175)  | 0.3 (1)<br>8.3 (29)<br>37.6 (131)<br><b>53.7</b> (187)  | 0 (0)<br>7.0 (24)<br>37.2 (127)<br><b>55.7</b> (190)    | 0 (0)<br>5.9 (20)<br>35.6 (120)<br><b>58.5</b> (197)    |
| Inter / intraprofessional referrals                                                                                                                                 | not allowed<br>under supervision<br>shared responsibility<br>full autonomy | 13.1 (94)<br>13.1 (94)<br><b>51.7</b> (371)<br>22.1 (159)            | 4.1 (12)<br>17.6 (52)<br><b>46.8</b> (138)<br>31.5 (93)  | 0.7 (2)<br>17.8 (53)<br><b>48.0</b> (143)<br>33.6 (100) | 0 (0)<br>14.9 (44)<br><b>49.5</b> (146)<br>35.6 (105)   | 0 (0)<br>15.0 (44)<br><b>47.3</b> (139)<br>37.8 (111)   |
| facilitation of medication management                                                                                                                               | not allowed<br>under supervision<br>shared responsibility<br>full autonomy | 14.9 (105)<br>14.3 (101)<br><b>47.8</b> (337)<br>23.0 (162)          | 2.4 (7)<br>21.5 (63)<br><b>45.7</b> (134)<br>30.4 (89)   | 1.3 (4)<br>19.1 (57)<br><b>48.3</b> (144)<br>31.2 (93)  | 0.3 (1)<br>17.3 (51)<br><b>46.9</b> (138)<br>35.4 (104) | 0.3 (1)<br>17.4 (51)<br><b>46.4</b> (136)<br>35.8 (105) |
| selfcare support and therapeutic education                                                                                                                          | not allowed<br>under supervision<br>shared responsibility<br>full autonomy | 4.4 (33)<br>7.6 (57)<br><b>48.1</b> (359)<br>39.8 (297)              | 1.1 (4)<br>11.7 (41)<br>38.7 (135)<br><b>48.4</b> (169)  | 0.6 (2)<br>9.9 (35)<br>39.2 (139)<br><b>50.4</b> (179)  | 0 (0)<br>9.1 (32)<br>38.5 (135)<br><b>52.4</b> (184)    | 0 (0)<br>8.9 (31)<br>38.1 (133)<br><b>53.0</b> (185)    |
| advice (patient or other healthcare professional)                                                                                                                   | not allowed<br>under supervision<br>shared responsibility<br>full autonomy | 8.1 (59)<br>10.8 (78)<br><b>49.7</b> (360)<br>31.4 (228)             | 3.4 (11)<br>15.8 (51)<br><b>41.9</b> (135)<br>38.8 (125) | 0.3 (1)<br>13.5 (44)<br><b>44.8</b> (146)<br>41.4 (135) | 0 (0)<br>12.7 (41)<br>41.6 (134)<br><b>45.7</b> (147)   | 0 (0)<br>12.1 (39)<br>40.2 (129)<br><b>47.7</b> (153)   |
| transitional care communication, inter /<br>intraprofessional collaboration / communication<br>including reporting, advising, informing, alerting and<br>discussing | not allowed<br>under supervision<br>shared responsibility<br>full autonomy | 8.7 (63)<br>10.6 (77)<br><b>55.7</b> (405)<br>25.0 (182)             | 2.2 (7)<br>19.4 (62)<br><b>42.9</b> (137)<br>35.4 (113)  | 0.3 (1)<br>15.8 (51)<br><b>45.7</b> (147)<br>38.2 (123) | 0 (0)<br>14.8 (47)<br><b>44.0</b> (140)<br>41.2 (131)   | 0 (0)<br>13.6 (43)<br><b>43.8</b> (139)<br>42.6 (135)   |
| mentoring colleagues                                                                                                                                                | not allowed<br>under supervision<br>shared responsibility<br>full autonomy | 7.0 (49)<br>11.8 (82)<br><b>47.2</b> (329)<br>34.0 (237)             | 4.8 (15)<br>16.3 (51)<br><b>39.6</b> (124)<br>39.3 (123) | 0.6 (2)<br>15.0 (48)<br>40.3 (129)<br><b>44.1</b> (141) | 0 (0)<br>13.1 (41)<br>38.2 (120)<br><b>48.7</b> (153)   | 0 (0)<br>11.9 (37)<br>36.9 (115)<br><b>51.3</b> (160)   |
| <b>RESPONSIBILITY 5: PRESCRIPTION MANAGEMENT (n=669)</b>                                                                                                            |                                                                            |                                                                      |                                                          |                                                         |                                                         |                                                         |
| <b>Task within 'prescription management'</b>                                                                                                                        | Degree of<br>responsibility for                                            | <b>All nurses</b> (no<br>distinction between<br>levels of education) | <b>level 5<br/>nurses</b>                                | <b>level 6 nurses</b>                                   | <b>level 7 nurses</b>                                   | <b>level 8 nurses</b>                                   |

|                                                                                    | nurses performing this task                                                | % (n)                                                       | % (n)                                                    | % (n)                                                   | % (n)                                                   | % (n)                                                   |
|------------------------------------------------------------------------------------|----------------------------------------------------------------------------|-------------------------------------------------------------|----------------------------------------------------------|---------------------------------------------------------|---------------------------------------------------------|---------------------------------------------------------|
| observation, documentation, registration, report                                   | not allowed<br>under supervision<br>shared responsibility<br>full autonomy | 31.0 (215)<br>11.0 (76)<br>27.1 (188)<br><b>30.9</b> (214)  | 5.0 (14)<br>18.9 (53)<br>30.7 (85)<br><b>45.4</b> (127)  | 1.4 (4)<br>19.3 (55)<br>34.0 (97)<br><b>45.3</b> (129)  | 0.7 (2)<br>17.1 (49)<br>34.3 (98)<br><b>47.9</b> (137)  | 0.4 (1)<br>15.4 (43)<br>34.4 (96)<br><b>49.8</b> (139)  |
| assessing patients competences                                                     | not allowed<br>under supervision<br>shared responsibility<br>full autonomy | 28.8 (192)<br>8.7 (58)<br><b>32.3</b> (215)<br>30.2 (201)   | 4.0 (11)<br>15.2 (42)<br>38.3 (106)<br><b>42.6</b> (118) | 1.8 (5)<br>15.1 (43)<br>39.4 (112)<br><b>43.7</b> (124) | 0.4 (1)<br>12.1 (34)<br>40.1 (113)<br><b>47.5</b> (134) | 0.4 (1)<br>11.2 (31)<br>39.9 (111)<br><b>48.6</b> (135) |
| assessment and addressing patient/family needs                                     | not allowed<br>under supervision<br>shared responsibility<br>full autonomy | 18.9 (126)<br>16.8 (112)<br><b>35.2</b> (235)<br>29.1 (194) | 2.5 (7)<br>15.7 (44)<br><b>44.1</b> (124)<br>37.7 (106)  | 2.1 (6)<br>13.8 (40)<br><b>46.0</b> (133)<br>38.1 (110) | 0.4 (1)<br>10.9 (31)<br><b>47.0</b> (134)<br>41.8 (119) | 0.4 (1)<br>10.6 (30)<br><b>45.4</b> (128)<br>43.6 (123) |
| recognising & preventing risks / complications / medication errors                 | not allowed<br>under supervision<br>shared responsibility<br>full autonomy | 21.9 (151)<br>18.1 (125)<br><b>38.4</b> (265)<br>21.6 (149) | 4.2 (12)<br>20.9 (60)<br><b>42.9</b> (123)<br>32.1 (92)  | 2.1 (6)<br>17.2 (50)<br><b>47.2</b> (137)<br>33.4 (97)  | 0 (0)<br>14.8 (43)<br><b>47.9</b> (139)<br>37.2 (108)   | 0 (0)<br>13.4 (38)<br><b>48.6</b> (138)<br>38.0 (108)   |
| identification, reporting and addressing contra-indications, drug related problems | not allowed<br>under supervision<br>shared responsibility<br>full autonomy | 21.6 (148)<br>20.6 (141)<br><b>40.9</b> (280)<br>16.8 (115) | 4.0 (11)<br>21.6 (59)<br><b>48.0</b> (131)<br>26.4 (72)  | 2.1 (6)<br>19.6 (55)<br><b>51.1</b> (143)<br>27.1 (76)  | 0.4 (1)<br>17.0 (47)<br><b>51.1</b> (141)<br>31.5 (87)  | 0 (0)<br>16.2 (44)<br><b>50.7</b> (138)<br>33.1 (90)    |
| follow-up                                                                          | not allowed<br>under supervision<br>shared responsibility<br>full autonomy | 20.5 (141)<br>19.6 (135)<br><b>35.3</b> (243)<br>24.6 (169) | 4.0 (11)<br>18.7 (51)<br><b>40.7</b> (111)<br>36.6 (100) | 1.4 (4)<br>17.6 (49)<br><b>43.9</b> (122)<br>37.1 (103) | 0 (0)<br>14.3 (40)<br><b>46.2</b> (129)<br>39.4 (110)   | 0 (0)<br>13.5 (37)<br><b>44.2</b> (121)<br>42.3 (116)   |
| evidence based practice                                                            | not allowed<br>under supervision<br>shared responsibility<br>full autonomy | 25.2 (164)<br>17.5 (114)<br><b>33.3</b> (217)<br>24.0 (156) | 6.4 (16)<br>16.9 (42)<br><b>39.8</b> (99)<br>36.9 (92)   | 2.3 (6)<br>15.9 (41)<br><b>43.8</b> (113)<br>38.0 (98)  | 0 (0)<br>12.7 (33)<br>43.2 (112)<br><b>44.0</b> (114)   | 0 (0)<br>10.8 (27)<br>43.0 (108)<br><b>46.2</b> (116)   |
| decision making                                                                    | not allowed<br>under supervision<br>shared responsibility<br>full autonomy | 35.1 (233)<br>20.7 (137)<br><b>32.0</b> (212)<br>12.2 (81)  | 10.0 (23)<br>25.1 (58)<br><b>45.0</b> (104)<br>19.9 (46) | 3.4 (8)<br>26.7 (63)<br><b>50.4</b> (119)<br>19.5 (46)  | 0.8 (2)<br>23.0 (55)<br><b>51.9</b> (124)<br>24.3 (58)  | 0.4 (1)<br>21.1 (49)<br><b>52.6</b> (122)<br>25.9 (60)  |
| communication /discussion with patient/family                                      | not allowed<br>under supervision<br>shared responsibility<br>full autonomy | 20.0 (136)<br>16.6 (113)<br><b>36.3</b> (247)<br>27.2 (185) | 4.6 (13)<br>13.2 (37)<br><b>45.2</b> (127)<br>37.0 (104) | 1.4 (4)<br>11.5 (33)<br><b>49.5</b> (142)<br>37.6 (108) | 0 (0)<br>9.8 (28)<br><b>48.1</b> (138)<br>42.2 (121)    | 0 (0)<br>8.5 (24)<br><b>48.2</b> (136)<br>43.3 (122)    |
| Inter / intraprofessional referrals                                                | not allowed<br>under supervision                                           | 29.7 (191)<br>16.5 (106)                                    | 6.9 (16)<br>19.7 (46)                                    | 4.1 (10)<br>18.7 (45)                                   | 0.4 (1)<br>17.0 (41)                                    | 0 (0)<br>14.4 (34)                                      |



|                                                                                 |                                                                            |                                                             |                                                         |                                                               |                                                        |                                                        |
|---------------------------------------------------------------------------------|----------------------------------------------------------------------------|-------------------------------------------------------------|---------------------------------------------------------|---------------------------------------------------------------|--------------------------------------------------------|--------------------------------------------------------|
|                                                                                 | shared responsibility<br>full autonomy                                     | <b>36.0</b> (232)<br>17.9 (115)                             | <b>45.1</b> (105)<br>28.3 (66)                          | <b>48.1</b> (116)<br>29.0 (70)                                | <b>47.3</b> (114)<br>35.3 (85)                         | <b>48.3</b> (114)<br>37.3 (88)                         |
| facilitation of medication management                                           | not allowed<br>under supervision<br>shared responsibility<br>full autonomy | 31.5 (210)<br>17.5 (117)<br><b>31.8</b> (212)<br>19.2 (128) | 6.3 (16)<br>26.7 (68)<br><b>43.1</b> (110)<br>23.9 (61) | 1.9 (5)<br>25.3 (65)<br><b>45.5</b> (117)<br>27.2 (70)        | 0.4 (1)<br>20.1 (51)<br><b>48.8</b> (124)<br>30.7 (78) | 0 (0)<br>20.2 (50)<br><b>47.4</b> (117)<br>32.4 (80)   |
| advice (patient or other healthcare professional)                               | not allowed<br>under supervision<br>shared responsibility<br>full autonomy | 27.7 (184)<br>18.8 (125)<br><b>36.3</b> (241)<br>17.2 (114) | 8.6 (22)<br>23.7 (61)<br><b>43.2</b> (111)<br>24.5 (63) | 3.4 (9)<br>23.3 (62)<br><b>47.4</b> (126)<br>25.9 (69)        | 0 (0)<br>19.4 (51)<br><b>49.8</b> (131)<br>30.8 (81)   | 0 (0)<br>18.5 (48)<br><b>50.0</b> (130)<br>31.5 (82)   |
| determination of type/dosage                                                    | not allowed<br>under supervision<br>shared responsibility<br>full autonomy | <b>52.4</b> (356)<br>17.2 (117)<br>19.3 (131)<br>11.2 (76)  | 16.7 (31)<br><b>32.3</b> (60)<br>29.0 (54)<br>22.0 (41) | 9.8 (19)<br><b>34.2</b> (66)<br>32.6 (63)<br>23.3 (45)        | 3.6 (7)<br>30.6 (59)<br><b>37.3</b> (72)<br>28.5 (55)  | 1.1 (2)<br>32.8 (62)<br><b>35.4</b> (67)<br>30.7 (58)  |
| initiation of medication (reactive / proactive)                                 | not allowed<br>under supervision<br>shared responsibility<br>full autonomy | <b>50.5</b> (344)<br>18.2 (124)<br>20.4 (139)<br>10.9 (74)  | 17.9 (36)<br><b>34.8</b> (70)<br>25.4 (51)<br>21.9 (44) | 8.7 (18)<br><b>35.4</b> (73)<br>33.5 (69)<br>22.3 (46)        | 3.9 (8)<br>32.9 (98)<br><b>34.3</b> (71)<br>29.0 (60)  | 2.0 (4)<br>33.5 (68)<br><b>34.0</b> (69)<br>30.5 (62)  |
| adaptation of dose, dose titration                                              | not allowed<br>under supervision<br>shared responsibility<br>full autonomy | <b>51.6</b> (349)<br>18.0 (122)<br>19.8 (134)<br>10.5 (71)  | 19.8 (38)<br><b>33.9</b> (65)<br>25.5 (49)<br>20.8 (40) | 10.9 (22)<br><b>37.8</b> (76)<br>28.4 (57)<br>22.9 (46)       | 4.0 (8)<br>34.2 (68)<br><b>34.7</b> (69)<br>27.1 (54)  | 2.5 (5)<br>32.7 (65)<br><b>35.2</b> (70)<br>29.6 (59)  |
| decision on continuation /cessation of medication                               | not allowed<br>under supervision<br>shared responsibility<br>full autonomy | <b>51.3</b> (344)<br>15.6 (105)<br>22.7 (152)<br>10.4 (70)  | 15.6 (30)<br>30.7 (59)<br><b>33.9</b> (65)<br>19.8 (38) | 9.9 (20)<br>32.7 (66)<br><b>36.1</b> (73)<br>21.3 (43)        | 3.0 (6)<br>28.5 (57)<br><b>43.0</b> (86)<br>25.5 (51)  | 1.5 (3)<br>26.9 (53)<br><b>43.7</b> (86)<br>27.9 (55)  |
| PRN (pro re nata, 'if needed' medication) / standing prescription renewal order | not allowed<br>under supervision<br>shared responsibility<br>full autonomy | 40.3 (273)<br>16.7 (113)<br><b>26.1</b> (177)<br>16.8 (114) | 10.7 (24)<br>30.2 (68)<br><b>32.4</b> (73)<br>26.7 (60) | 4.7 (11)<br>29.7 (69)<br><b>32.8</b> (76)<br><b>32.8</b> (76) | 0.9 (2)<br>26.0 (60)<br>35.5 (82)<br><b>37.7</b> (87)  | 1.3 (3)<br>23.1 (53)<br>26.7 (84)<br><b>28.9</b> (89)  |
| medication reconciliation                                                       | not allowed<br>under supervision<br>shared responsibility<br>full autonomy | 37.5 (252)<br>15.3 (103)<br><b>31.8</b> (214)<br>15.3 (103) | 8.6 (20)<br>28.8 (37)<br><b>39.5</b> (92)<br>23.2 (54)  | 4.2 (10)<br>24.9 (59)<br><b>45.1</b> (107)<br>25.7 (61)       | 0.8 (2)<br>22.2 (53)<br><b>44.8</b> (107)<br>32.2 (77) | 0.9 (2)<br>19.3 (45)<br><b>45.5</b> (106)<br>34.3 (80) |
| medication review                                                               | not allowed<br>under supervision<br>shared responsibility<br>full autonomy | 41.7 (285)<br>17.7 (121)<br><b>27.8</b> (190)<br>12.9 (88)  | 10.8 (25)<br>29.9 (69)<br><b>35.9</b> (83)<br>23.4 (54) | 6.4 (15)<br>28.6 (67)<br><b>39.3</b> (92)<br>25.6 (60)        | 1.7 (4)<br>27.9 (65)<br><b>39.9</b> (93)<br>30.5 (71)  | 1.3 (3)<br>24.7 (57)<br><b>41.6</b> (96)<br>32.5 (75)  |
| intervention in case of emergency                                               | not allowed<br>under supervision                                           | 29.0 (200)<br>17.6 (121)                                    | 6.4 (18)<br>26.1 (73)                                   | 2.8 (8)<br>23.4 (67)                                          | 0 (0)<br>21.9 (62)                                     | 0.4 (1)<br>21.0 (59)                                   |

|                                                                                                                                                                     | shared responsibility<br>full autonomy                                     | <b>34.4</b> (237)<br>19.0 (131)                               | <b>41.8</b> (117)<br>25.7 (72)                          | <b>46.2</b> (132)<br>27.6 (79)                          | <b>46.3</b> (131)<br>31.8 (90)                          | <b>45.9</b> (129)<br>32.7 (92)                          |
|---------------------------------------------------------------------------------------------------------------------------------------------------------------------|----------------------------------------------------------------------------|---------------------------------------------------------------|---------------------------------------------------------|---------------------------------------------------------|---------------------------------------------------------|---------------------------------------------------------|
| transitional care communication, inter /<br>intraprofessional collaboration / communication<br>including reporting, advising, informing, alerting and<br>discussing | not allowed<br>under supervision<br>shared responsibility<br>full autonomy | 26.7 (177)<br>12.2 (81)<br><b>42.0</b> (279)<br>19.1 (127)    | 5.3 (14)<br>15.6 (41)<br><b>51.0</b> (134)<br>28.1 (74) | 3.0 (8)<br>16.6 (41)<br><b>51.7</b> (116)<br>28.8 (93)  | 0 (0)<br>12.6 (34)<br><b>54.1</b> (146)<br>33.3 (90)    | 0 (0)<br>11.9 (32)<br><b>54.1</b> (146)<br>34.1 (92)    |
| mentoring colleagues                                                                                                                                                | not allowed<br>under supervision<br>shared responsibility<br>full autonomy | 29.0 (193)<br>11.4 (76)<br><b>33.4</b> (222)<br>26.2 (174)    | 8.3 (21)<br>16.7 (42)<br><b>42.1</b> (106)<br>32.9 (83) | 4.6 (2)<br>15.6 (49)<br><b>44.3</b> (98)<br>35.5 (137)  | 0.4 (1)<br>14.7 (38)<br><b>44.2</b> (114)<br>40.7 (105) | 0 (0)<br>12.2 (31)<br><b>44.1</b> (112)<br>43.7 (111)   |
| <b>PHARMACEUTICAL CARE DOMAIN 6: MEDICATION SAFETY MANAGEMENT (n=738)</b>                                                                                           |                                                                            |                                                               |                                                         |                                                         |                                                         |                                                         |
| Task within 'medication safety management'                                                                                                                          | Degree of<br>responsibility for<br>nurses performing<br>this task          | All nurses (no<br>distinction between<br>levels of education) | level 5<br>nurses                                       | level 6 nurses                                          | level 7 nurses                                          | level 8 nurses                                          |
|                                                                                                                                                                     |                                                                            | % (n)                                                         | % (n)                                                   | % (n)                                                   | % (n)                                                   | % (n)                                                   |
| observation, documentation, registration, report                                                                                                                    | not allowed<br>under supervision<br>shared responsibility<br>full autonomy | 10.1 (79)<br>13.5 (105)<br>35.8 (279)<br><b>40.6</b> (316)    | 0.8 (3)<br>11.5 (42)<br>35.6 (130)<br><b>52.1</b> (190) | 0.3 (1)<br>9.7 (36)<br>36.4 (135)<br><b>53.6</b> (199)  | 0 (0)<br>10.2 (37)<br>35.5 (128)<br><b>54.3</b> (196)   | 0 (0)<br>9.7 (35)<br>35.0 (126)<br><b>55.3</b> (199)    |
| assessing patients competences                                                                                                                                      | not allowed<br>under supervision<br>shared responsibility<br>full autonomy | 10.7 (81)<br>13.9 (105)<br><b>38.8</b> (293)<br>36.6 (277)    | 0.6 (2)<br>12.5 (44)<br>40.2 (141)<br><b>46.7</b> (164) | 0 (0)<br>9.9 (35)<br>41.9 (148)<br><b>48.2</b> (170)    | 0 (0)<br>10.3 (36)<br>41.1 (143)<br><b>48.6</b> (169)   | 0 (0)<br>9.6 (33)<br>40.6 (140)<br><b>49.9</b> (172)    |
| assessment and addressing patient/family needs                                                                                                                      | not allowed<br>under supervision<br>shared responsibility<br>full autonomy | 4.6 (35)<br>14.7 (111)<br><b>44.2</b> (334)<br>36.5 (276)     | 0.3 (1)<br>10.0 (35)<br>44.0 (154)<br><b>45.7</b> (160) | 0 (0)<br>8.1 (29)<br>44.7 (159)<br><b>47.2</b> (168)    | 0 (0)<br>7.4 (26)<br>44.6 (156)<br><b>48.0</b> (168)    | 0 (0)<br>6.6 (23)<br>44.2 (153)<br><b>49.1</b> (170)    |
| recognising & preventing risks / complications /<br>medication errors                                                                                               | not allowed<br>under supervision<br>shared responsibility<br>full autonomy | 5.9 (45)<br>17.0 (129)<br><b>48.9</b> (372)<br>28.3 (215)     | 1.1 (4)<br>13.3 (47)<br><b>45.8</b> (162)<br>39.8 (141) | 0.5 (2)<br>11.8 (43)<br><b>47.4</b> (173)<br>40.3 (147) | 0.6 (2)<br>10.1 (36)<br><b>48.2</b> (171)<br>41.1 (146) | 0.3 (1)<br>9.7 (34)<br><b>47.6</b> (167)<br>42.5 (149)  |
| identification, reporting and addressing contra-<br>indications, drug related problems                                                                              | not allowed<br>under supervision<br>shared responsibility<br>full autonomy | 7.8 (58)<br>18.6 (139)<br><b>50.1</b> (374)<br>23.6 (176)     | 1.5 (5)<br>17.1 (58)<br><b>48.2</b> (164)<br>33.2 (113) | 0.9 (3)<br>14.3 (50)<br><b>50.1</b> (175)<br>34.7 (121) | 0.3 (1)<br>12.6 (43)<br><b>51.6</b> (176)<br>35.5 (121) | 0.3 (1)<br>12.1 (41)<br><b>51.2</b> (173)<br>36.4 (123) |
| follow-up                                                                                                                                                           | not allowed<br>under supervision<br>shared responsibility<br>full autonomy | 6.1 (46)<br>17.2 (129)<br><b>47.7</b> (359)<br>29.0 (218)     | 1.4 (5)<br>13.1 (46)<br><b>46.0</b> (161)<br>39.4 (138) | 0.3 (1)<br>10.8 (38)<br><b>48.7</b> (172)<br>40.2 (142) | 0 (0)<br>9.8 (34)<br><b>48.4</b> (168)<br>41.8 (145)    | 0 (0)<br>9.3 (32)<br><b>47.2</b> (163)<br>43.5 (150)    |

|                                                                                                                                                                       |                                                                            |                                                             |                                                          |                                                         |                                                         |                                                              |
|-----------------------------------------------------------------------------------------------------------------------------------------------------------------------|----------------------------------------------------------------------------|-------------------------------------------------------------|----------------------------------------------------------|---------------------------------------------------------|---------------------------------------------------------|--------------------------------------------------------------|
| evidence based practice                                                                                                                                               | not allowed<br>under supervision<br>shared responsibility<br>full autonomy | 8.9 (64)<br>20.0 (144)<br><b>41.7</b> (301)<br>29.4 (212)   | 3.4 (11)<br>16.4 (53)<br><b>40.1</b> (130)<br>40.0 (130) | 2.7 (9)<br>14.8 (49)<br><b>42.0</b> (139)<br>40.5 (134) | 0 (0)<br>13.8 (45)<br>41.7 (136)<br><b>44.5</b> (145)   | 0 (0)<br>12.8 (41)<br>40.5 (13)<br><b>46.7</b> (150)         |
| decision making                                                                                                                                                       | not allowed<br>under supervision<br>shared responsibility<br>full autonomy | 16.5 (120)<br>23.8 (173)<br><b>44.4</b> (323)<br>15.3 (111) | 3.7 (11)<br>24.4 (72)<br><b>49.8</b> (147)<br>22.0 (65)  | 1.3 (4)<br>24.2 (73)<br><b>52.6</b> (159)<br>21.9 (66)  | 0.7 (2)<br>20.3 (61)<br><b>54.5</b> (164)<br>24.6 (74)  | 0.3 (1)<br>19.5 (58)<br><b>52.2</b> (155)<br>27.9 (83)       |
| communication /discussion with patient/family                                                                                                                         | not allowed<br>under supervision<br>shared responsibility<br>full autonomy | 5.6 (42)<br>15.9 (119)<br><b>47.3</b> (354)<br>31.2 (234)   | 1.2 (4)<br>13.6 (47)<br><b>46.5</b> (161)<br>38.7 (134)  | 0 (0)<br>12.2 (43)<br><b>49.6</b> (175)<br>38.2 (135)   | 0 (0)<br>10.1 (35)<br><b>48.4</b> (167)<br>41.4 (143)   | 0 (0)<br>10.2 (35)<br><b>46.4</b> (159)<br>43.4 (149)        |
| Inter / intraprofessional referrals                                                                                                                                   | not allowed<br>under supervision<br>shared responsibility<br>full autonomy | 13.0 (94)<br>19.1 (138)<br><b>48.8</b> (352)<br>19.0 (137)  | 4.0 (12)<br>16.1 (48)<br><b>53.8</b> (161)<br>26.1 (78)  | 0.7 (2)<br>15.6 (47)<br><b>57.6</b> (174)<br>26.2 (79)  | 0 (0)<br>14.3 (43)<br><b>55.7</b> (167)<br>30.0 (90)    | 0 (0)<br>13.5 (40)<br><b>54.4</b> (161)<br>32.1 (95)         |
| facilitation of medication management                                                                                                                                 | not allowed<br>under supervision<br>shared responsibility<br>full autonomy | 15.5 (112)<br>18.4 (133)<br><b>42.8</b> (309)<br>23.3 (168) | 3.5 (11)<br>18.9 (59)<br><b>47.8</b> (149)<br>29.8 (93)  | 0.6 (2)<br>17.9 (57)<br><b>51.9</b> (165)<br>29.6 (94)  | 0 (0)<br>16.3 (51)<br><b>51.4</b> (161)<br>32.3 (101)   | 0 (0)<br>15.9 (49)<br><b>49.8</b> (154)<br>34.3 (106)        |
| selfcare support and therapeutic education                                                                                                                            | not allowed<br>under supervision<br>shared responsibility<br>full autonomy | 5.7 (43)<br>14.6 (109)<br><b>45.4</b> (340)<br>34.3 (257)   | 2.0 (7)<br>10.9 (38)<br><b>43.9</b> (152)<br>43.6 (152)  | 0.6 (2)<br>10.7 (38)<br>44.2 (157)<br><b>44.5</b> (158) | 0 (0)<br>8.6 (30)<br>44.3 (154)<br><b>47.1</b> (164)    | 0 (0)<br>8.1 (28)<br>43.2 (149)<br><b>48.7</b> (168)         |
| advice (patient or other healthcare professional)                                                                                                                     | not allowed<br>under supervision<br>shared responsibility<br>full autonomy | 8.7 (63)<br>18.3 (133)<br><b>46.0</b> (334)<br>27.0 (196)   | 1.8 (6)<br>17.1 (56)<br><b>44.6</b> (146)<br>36.4 (119)  | 0 (0)<br>14.6 (49)<br><b>47.5</b> (159)<br>37.9 (127)   | 0 (0)<br>13.1 (43)<br><b>45.9</b> (151)<br>41.0 (135)   | 0 (0)<br>13.0 (42)<br><b>43.5</b> (141)<br><b>43.5</b> (141) |
| intervention in case of emergency                                                                                                                                     | not allowed<br>under supervision<br>shared responsibility<br>full autonomy | 6.5 (49)<br>21.8 (164)<br><b>48.1</b> (361)<br>23.6 (177)   | 3.2 (11)<br>22.5 (78)<br><b>43.9</b> (152)<br>30.3 (105) | 0.6 (2)<br>22.5 (79)<br><b>45.9</b> (161)<br>31.1 (109) | 0 (0)<br>21.0 (73)<br><b>46.1</b> (160)<br>32.9 (114)   | 0 (0)<br>19.9 (68)<br><b>45.5</b> (155)<br>34.6 (118)        |
| transitional care communication, inter /<br>intraprofessional collaboration / communication<br>(including reporting, advising, informing, alerting and<br>discussing) | not allowed<br>under supervision<br>shared responsibility<br>full autonomy | 8.0 (58)<br>16.3 (118)<br><b>54.1</b> (393)<br>21.6 (157)   | 2.2 (7)<br>14.2 (46)<br><b>51.1</b> (165)<br>32.5 (105)  | 0.3 (1)<br>13.4 (44)<br><b>52.9</b> (174)<br>33.4 (110) | 0.3 (1)<br>11.5 (38)<br><b>52.7</b> (174)<br>35.5 (117) | 0.3 (1)<br>11.1 (36)<br><b>51.1</b> (166)<br>37.5 (122)      |
| mentoring colleagues                                                                                                                                                  | not allowed<br>under supervision<br>shared responsibility<br>full autonomy | 7.9 (57)<br>16.3 (117)<br><b>44.5</b> (319)<br>31.2 (224)   | 3.7 (12)<br>16.4 (53)<br><b>43.2</b> (140)<br>36.7 (119) | 0.9 (3)<br>13.5 (44)<br><b>46.2</b> (150)<br>39.4 (128) | 0.3 (1)<br>10.6 (34)<br><b>46.0</b> (148)<br>43.2 (139) | 0.3 (1)<br>10.3 (33)<br>43.6 (139)<br><b>45.8</b> (146)      |

| PHARMACEUTICAL CARE DOMAIN 7: (TRANSITION OF) CARE COORDINATION (n=711)            |                                                                            |                                                             |                                                         |                                                         |                                                         |                                                                |
|------------------------------------------------------------------------------------|----------------------------------------------------------------------------|-------------------------------------------------------------|---------------------------------------------------------|---------------------------------------------------------|---------------------------------------------------------|----------------------------------------------------------------|
| Task within '(transition of) care coordination'                                    | Degree of responsibility for nurses performing this task                   | All nurses (no distinction between levels of education)     | level 5 nurses                                          | level 6 nurses                                          | level 7 nurses                                          | level 8 nurses                                                 |
|                                                                                    |                                                                            | % (n)                                                       | % (n)                                                   | % (n)                                                   | % (n)                                                   | % (n)                                                          |
| observation, documentation, registration, report                                   | not allowed<br>under supervision<br>shared responsibility<br>full autonomy | 11.0 (82)<br>9.4 (70)<br>39.2 (293)<br><b>40.5</b> (303)    | 0.9 (3)<br>13.3 (45)<br>32.2 (109)<br><b>53.7</b> (182) | 0.6 (2)<br>11.6 (40)<br>33.9 (117)<br><b>53.9</b> (186) | 0 (0)<br>10.9 (37)<br>34.6 (118)<br><b>54.5</b> (186)   | 0.3 (1)<br>9.8 (33)<br>33.8 (114)<br><b>56.1</b> (189)         |
| assessing patients competences                                                     | not allowed<br>under supervision<br>shared responsibility<br>full autonomy | 10.9 (80)<br>9.3 (68)<br><b>43.4</b> (319)<br>36.5 (268)    | 0.3 (1)<br>11.7 (39)<br>39.5 (132)<br><b>48.5</b> (162) | 0.9 (3)<br>9.8 (33)<br>40.8 (137)<br><b>48.5</b> (163)  | 0.3 (1)<br>9.7 (32)<br>39.6 (131)<br><b>50.5</b> (167)  | 0.6 (2)<br>8.8 (29)<br>39.3 (129)<br><b>51.2</b> (168)         |
| assessment and addressing patient/family needs                                     | not allowed<br>under supervision<br>shared responsibility<br>full autonomy | 5.2 (38)<br>8.7 (64)<br><b>47.3</b> (347)<br>38.8 (285)     | 0.3 (1)<br>11.1 (37)<br>41.4 (138)<br><b>47.1</b> (157) | 0.9 (3)<br>9.5 (32)<br>42.1 (142)<br><b>47.5</b> (160)  | 0.3 (1)<br>8.2 (27)<br>42.0 (139)<br><b>49.5</b> (164)  | 0.6 (2)<br>7.9 (26)<br>40.9 (134)<br><b>50.6</b> (166)         |
| recognising & preventing risks / complications / medication errors                 | not allowed<br>under supervision<br>shared responsibility<br>full autonomy | 6.8 (49)<br>12.3 (89)<br><b>51.0</b> (369)<br>29.9 (216)    | 1.9 (6)<br>13.8 (44)<br>41.7 (133)<br><b>42.6</b> (136) | 0.6 (2)<br>12.3 (40)<br><b>44.8</b> (145)<br>42.3 (137) | 0.3 (1)<br>11.6 (37)<br><b>44.8</b> (143)<br>43.3 (138) | 0.6 (2)<br>10.5 (33)<br><b>44.4</b> (140)<br><b>44.4</b> (140) |
| identification, reporting and addressing contra-indications, drug related problems | not allowed<br>under supervision<br>shared responsibility<br>full autonomy | 9.1 (65)<br>14.1 (101)<br><b>51.7</b> (371)<br>25.1 (180)   | 1.9 (6)<br>17.0 (53)<br><b>41.8</b> (130)<br>39.2 (122) | 0.9 (3)<br>14.6 (46)<br><b>45.6</b> (144)<br>38.9 (123) | 0.3 (1)<br>12.3 (38)<br><b>46.1</b> (143)<br>41.3 (128) | 0.7 (2)<br>11.4 (35)<br><b>45.0</b> (138)<br>43.0 (132)        |
| follow-up                                                                          | not allowed<br>under supervision<br>shared responsibility<br>full autonomy | 7.4 (53)<br>12.1 (87)<br><b>53.3</b> (384)<br>27.3 (197)    | 1.9 (6)<br>13.4 (43)<br>41.3 (133)<br><b>43.5</b> (140) | 0.6 (2)<br>11.2 (36)<br><b>44.5</b> (143)<br>43.6 (140) | 0 (0)<br>9.7 (31)<br>44.7 (142)<br><b>45.6</b> (145)    | 0.3 (1)<br>8.9 (28)<br>44.3 (139)<br><b>46.5</b> (146)         |
| evidence based practice                                                            | not allowed<br>under supervision<br>shared responsibility<br>full autonomy | 8.4 (58)<br>11.6 (80)<br><b>47.2</b> (326)<br>32.9 (227)    | 3.0 (9)<br>16.8 (51)<br>35.0 (106)<br><b>45.2</b> (137) | 1.6 (5)<br>13.4 (41)<br>39.9 (122)<br><b>45.1</b> (138) | 0.7 (2)<br>11.8 (36)<br>38.2 (117)<br><b>49.3</b> (151) | 1.0 (3)<br>11.0 (33)<br>37.7 (113)<br><b>50.3</b> (151)        |
| decision making                                                                    | not allowed<br>under supervision<br>shared responsibility<br>full autonomy | 16.9 (119)<br>16.1 (113)<br><b>47.9</b> (337)<br>19.1 (134) | 4.6 (13)<br>20.6 (58)<br><b>44.0</b> (124)<br>30.9 (87) | 2.8 (8)<br>18.3 (53)<br><b>49.1</b> (142)<br>29.8 (86)  | 0.7 (2)<br>17.4 (50)<br><b>49.5</b> (142)<br>32.4 (93)  | 1.1 (3)<br>15.4 (44)<br><b>48.8</b> (139)<br>34.7 (99)         |
| communication /discussion with patient/family                                      | not allowed<br>under supervision                                           | 6.7 (49)<br>12.2 (89)                                       | 1.2 (4)<br>13.2 (46)                                    | 0.3 (1)<br>11.7 (39)                                    | 0 (0)<br>10.4 (34)                                      | 0.3 (1)<br>9.6 (31)                                            |

|                                                                                                                                                            |                       |                   |                   |                   |                   |                   |
|------------------------------------------------------------------------------------------------------------------------------------------------------------|-----------------------|-------------------|-------------------|-------------------|-------------------|-------------------|
|                                                                                                                                                            | shared responsibility | <b>50.3</b> (368) | 41.4 (135)        | 43.5 (145)        | <b>43.6</b> (142) | 42.6 (138)        |
|                                                                                                                                                            | full autonomy         | 30.8 (225)        | <b>44.2</b> (144) | <b>44.4</b> (148) | <b>46.0</b> (150) | <b>47.5</b> (154) |
| Inter / intraprofessional referrals                                                                                                                        | not allowed           | 13.6 (96)         | 4.8 (14)          | 2.0 (6)           | 1.0 (3)           | 0.7 (2)           |
|                                                                                                                                                            | under supervision     | 13.7 (97)         | 18.2 (53)         | 17.1 (50)         | 15.1 (44)         | 13.6 (39)         |
|                                                                                                                                                            | shared responsibility | <b>51.6</b> (364) | <b>42.3</b> (123) | <b>46.1</b> (135) | <b>46.7</b> (136) | <b>47.2</b> (135) |
|                                                                                                                                                            | full autonomy         | 21.1 (149)        | 34.7 (101)        | 34.8 (102)        | 37.1 (108)        | 38.5 (110)        |
| facilitation of medication management                                                                                                                      | not allowed           | 18.0 (125)        | 3.8 (11)          | 1.0 (3)           | 0.3 (1)           | 0.7 (2)           |
|                                                                                                                                                            | under supervision     | 15.4 (107)        | 19.9 (58)         | 19.3 (57)         | 17.2 (50)         | 16.3 (47)         |
|                                                                                                                                                            | shared responsibility | <b>40.5</b> (282) | <b>39.5</b> (115) | <b>43.7</b> (129) | <b>43.8</b> (127) | <b>42.9</b> (124) |
|                                                                                                                                                            | full autonomy         | 26.1 (182)        | 36.8 (107)        | 35.9 (106)        | 38.6 (112)        | 40.1 (116)        |
| selfcare support and therapeutic education                                                                                                                 | not allowed           | 6.3 (45)          | 1.3 (4)           | 1.2 (4)           | 0 (0)             | 0.3 (1)           |
|                                                                                                                                                            | under supervision     | 9.5 (68)          | 11.6 (37)         | 9.8 (32)          | 8.7 (28)          | 7.5 (24)          |
|                                                                                                                                                            | shared responsibility | <b>47.7</b> (343) | 40.0 (128)        | 42.2 (137)        | 42.5 (137)        | 41.2 (131)        |
|                                                                                                                                                            | full autonomy         | 36.6 (263)        | <b>47.2</b> (151) | <b>46.8</b> (152) | <b>48.8</b> (157) | <b>50.9</b> (162) |
| advice (patient or other healthcare professional)                                                                                                          | not allowed           | 8.5 (59)          | 3.4 (10)          | 0.7 (2)           | 0.3 (1)           | 0.7 (2)           |
|                                                                                                                                                            | under supervision     | 11.3 (78)         | 14.8 (44)         | 13.9 (42)         | 12.5 (38)         | 10.1 (30)         |
|                                                                                                                                                            | shared responsibility | <b>53.8</b> (372) | <b>42.8</b> (127) | <b>46.5</b> (141) | <b>44.2</b> (134) | <b>44.9</b> (133) |
|                                                                                                                                                            | full autonomy         | 26.4 (183)        | 39.1 (116)        | 38.9 (118)        | 42.9 (130)        | 44.3 (131)        |
| discharge planning, transition of care planning                                                                                                            | not allowed           | 13.0 (92)         | 5.9 (17)          | 2.7 (8)           | 1.0 (3)           | 1.0 (3)           |
|                                                                                                                                                            | under supervision     | 14.9 (106)        | 20.1 (58)         | 17.7 (53)         | 15.8 (46)         | 13.8 (40)         |
|                                                                                                                                                            | shared responsibility | <b>50.4</b> (358) | <b>41.7</b> (120) | <b>47.8</b> (143) | <b>49.0</b> (143) | <b>48.8</b> (41)  |
|                                                                                                                                                            | full autonomy         | 21.7 (154)        | 32.3 (93)         | 31.8 (95)         | 34.2 (100)        | 36.3 (105)        |
| transitional care communication, inter / intraprofessional collaboration / communication including reporting, advising, informing, alerting and discussing | not allowed           | 8.9 (63)          | 3.9 (12)          | 1.0 (3)           | 0 (0)             | 0.3 (1)           |
|                                                                                                                                                            | under supervision     | 11.4 (81)         | 14.8 (46)         | 11.8 (37)         | 11.6 (36)         | 9.4 (29)          |
|                                                                                                                                                            | shared responsibility | <b>55.3</b> (393) | <b>45.2</b> (140) | <b>49.2</b> (154) | <b>49.7</b> (154) | <b>50.0</b> (154) |
|                                                                                                                                                            | full autonomy         | 24.5 (174)        | 36.1 (112)        | 38.0 (119)        | 38.7 (120)        | 40.3 (124)        |
| mentoring colleagues                                                                                                                                       | not allowed           | 8.3 (57)          | 4.7 (14)          | 1.3 (4)           | 0 (0)             | 0.3 (1)           |
|                                                                                                                                                            | under supervision     | 10.3 (71)         | 15.4 (46)         | 14.1 (42)         | 12.6 (37)         | 11.3 (33)         |
|                                                                                                                                                            | shared responsibility | <b>49.8</b> (343) | <b>40.3</b> (120) | <b>43.3</b> (129) | 41.8 (123)        | 41.0 (120)        |
|                                                                                                                                                            | full autonomy         | 31.6 (218)        | 39.6 (118)        | 41.3 (123)        | <b>45.6</b> (134) | <b>47.4</b> (139) |

EQF = European qualification framework

<sup>a</sup>n(%) in this column represents opinions of both respondents who were not able to distinguish between levels of education and respondents, who were able to distinguish between levels of education but indicated that for the given task the same degree of responsibility was applicable for all levels of nurse education.

**Bold** numbers represent the most prevalent level of responsibility (mode) per task, per level of nurse education.
